# Supplementary material for: Computer vision for non-contact monitoring of catalyst degradation and product formation kinetics
Source: Royal Society of Chemistry journal article supplement (doi:10.1039/d2sc05702f), 2023-01-01
Supplement: d2sc05702f1.pdf [file d2sc05702f1.pdf]

## HPLC Traces

### HPLC Method:

| Time/min | Acetonitrile/% | Water/% |
|----------|----------------|---------|
| 0.0      | 5              | 95      |
| 3.0      | 50             | 50      |
| 6.0      | 0              | 100     |
| 6.5      | 0              | 100     |
| 7.5      | 5              | 95      |
| 8.5      | 5              | 95      |

### Peaks:

| Compound                                    | Retention time (RT) |
|---------------------------------------------|---------------------|
| Bromobenzene                                | 4.51 min            |
| 1,3,5-trimethoxybenzene (Internal standard) | 3.86 min            |

The product (phenylboronic acid pinacol ester) is unstable in the acid HPLC sample solution, will degrade to phenylboronic acid derivatives. Thus, only bromobenzene and internal standard (1,3,5-trimethoxybenzene) is labeled in the HPLC traces.

### Figure 9 – Borylation reaction with 0.5 mol% catalyst loading under Argon

Data File C:\Chem32\1\Data\Chunhui\Chunhui 2022-04-11 17-29-39\KS41\_0.D  
 Sample Name: KS41\_0

```

=====
Acq. Operator   : SYSTEM                      Seq. Line :    2
Acq. Instrument : Timon HPLC                  Location  :   11
Injection Date  : 11/04/2022 17:41:26       Inj       :    1
                                                Inj Volume: 5.000 µl
Method          : C:\Chem32\1\Data\Chunhui\Chunhui 2022-04-11 17-29-39\CY_KS.M (Sequence
                Method)
Last changed    : 11/04/2022 17:29:40 by SYSTEM
Additional Info  : Peak(s) manually integrated
  
```

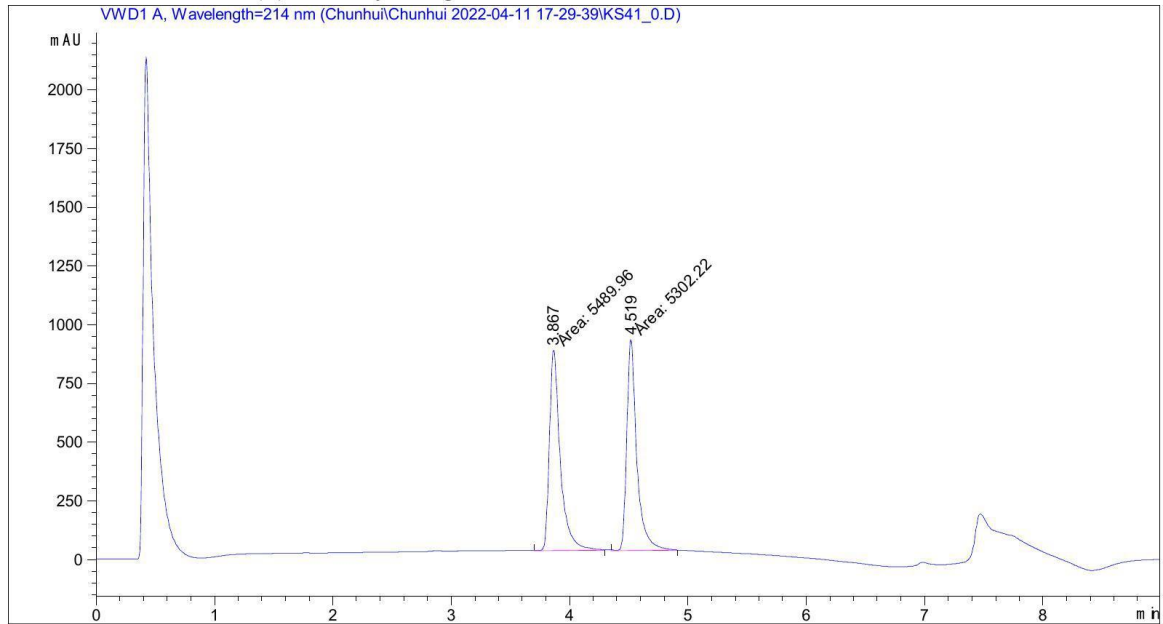

=====  
 Area Percent Report  
 =====

```

Sorted By      : Signal
Multiplier     : 1.0000
Dilution       : 1.0000
Use Multiplier & Dilution Factor with ISTDs
  
```

Signal 1: VWD1 A, Wavelength=214 nm

| Peak # | RetTime [min] | Type | Width [min] | Area [mAU*s] | Height [mAU] | Area %  |
|--------|---------------|------|-------------|--------------|--------------|---------|
| 1      | 3.867         | MM   | 0.1070      | 5489.95508   | 855.09387    | 50.8698 |
| 2      | 4.519         | MM   | 0.0983      | 5302.21680   | 899.28589    | 49.1302 |

Totals :                      1.07922e4 1754.37976

=====  
 \*\*\* End of Report \*\*\*

```
=====
Acq. Operator   : SYSTEM                      Seq. Line :    3
Acq. Instrument : Timon HPLC                  Location  :   12
Injection Date  : 11/04/2022 17:51:46        Inj       :    1
                                           Inj Volume: 5.000 µl
Method          : C:\Chem32\1\Data\Chunhui\Chunhui 2022-04-11 17-29-39\CY_KS.M (Sequence
Method)
Last changed    : 11/04/2022 17:29:40 by SYSTEM
Additional Info  : Peak(s) manually integrated
=====
```

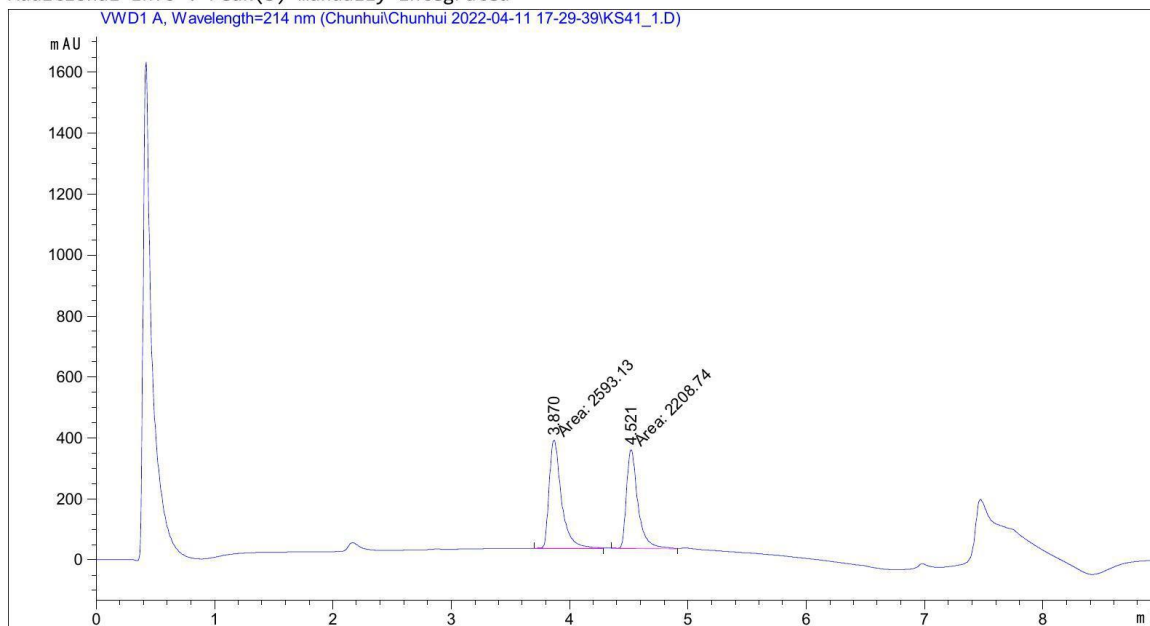

```
=====
                          Area Percent Report
=====
```

```
Sorted By      : Signal
Multiplier     : 1.0000
Dilution       : 1.0000
Use Multiplier & Dilution Factor with ISTDs
```

Signal 1: VWD1 A, Wavelength=214 nm

| Peak # | RetTime [min] | Type | Width [min] | Area [mAU*s] | Height [mAU] | Area %  |
|--------|---------------|------|-------------|--------------|--------------|---------|
| 1      | 3.870         | MM   | 0.1214      | 2593.13086   | 356.12320    | 54.0026 |
| 2      | 4.521         | MM   | 0.1132      | 2208.73535   | 325.08347    | 45.9974 |

```
Totals :                      4801.86621  681.20667
```

```
=====
*** End of Report ***
```

```

=====
Acq. Operator   : SYSTEM                      Seq. Line :    4
Acq. Instrument : Timon HPLC                  Location  :   13
Injection Date  : 11/04/2022 18:02:06       Inj       :    1
                                           Inj Volume: 5.000 µl
Method         : C:\Chem32\1\Data\Chunhui\Chunhui 2022-04-11 17-29-39\CY_KS.M (Sequence
                Method)
Last changed    : 11/04/2022 17:29:40 by SYSTEM
Additional Info  : Peak(s) manually integrated
  
```

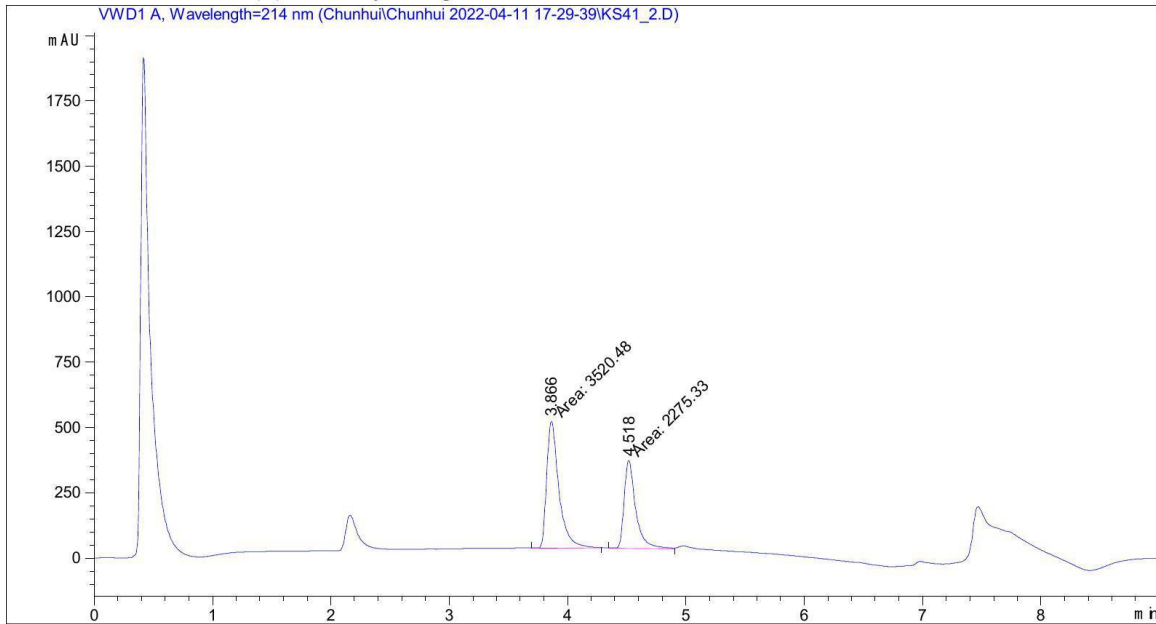

=====  
 Area Percent Report  
 =====

```

Sorted By      :      Signal
Multiplier     :      1.0000
Dilution       :      1.0000
Use Multiplier & Dilution Factor with ISTDs
  
```

Signal 1: VWD1 A, Wavelength=214 nm

| Peak # | RetTime [min] | Type | Width [min] | Area [mAU*s] | Height [mAU] | Area %  |
|--------|---------------|------|-------------|--------------|--------------|---------|
| 1      | 3.866         | MM   | 0.1208      | 3520.47656   | 485.58243    | 60.7417 |
| 2      | 4.518         | MM   | 0.1129      | 2275.33472   | 335.99689    | 39.2583 |

Totals :                    5795.81128   821.57932

=====  
 \*\*\* End of Report \*\*\*



Data File C:\Chem32\1\Data\Chunhui\Chunhui 2022-04-11 17-29-39\KS41\_4.D  
Sample Name: KS41\_4

=====

|                 |                       |            |            |
|-----------------|-----------------------|------------|------------|
| Acq. Operator   | : SYSTEM              | Seq. Line  | : 7        |
| Acq. Instrument | : Timon HPLC          | Location   | : 15       |
| Injection Date  | : 11/04/2022 18:33:08 | Inj        | : 1        |
|                 |                       | Inj Volume | : 5.000 µl |

Method : C:\Chem32\1\Data\Chunhui\Chunhui 2022-04-11 17-29-39\CY\_KS.M (Sequence Method)  
Last changed : 11/04/2022 17:29:40 by SYSTEM  
Additional Info : Peak(s) manually integrated

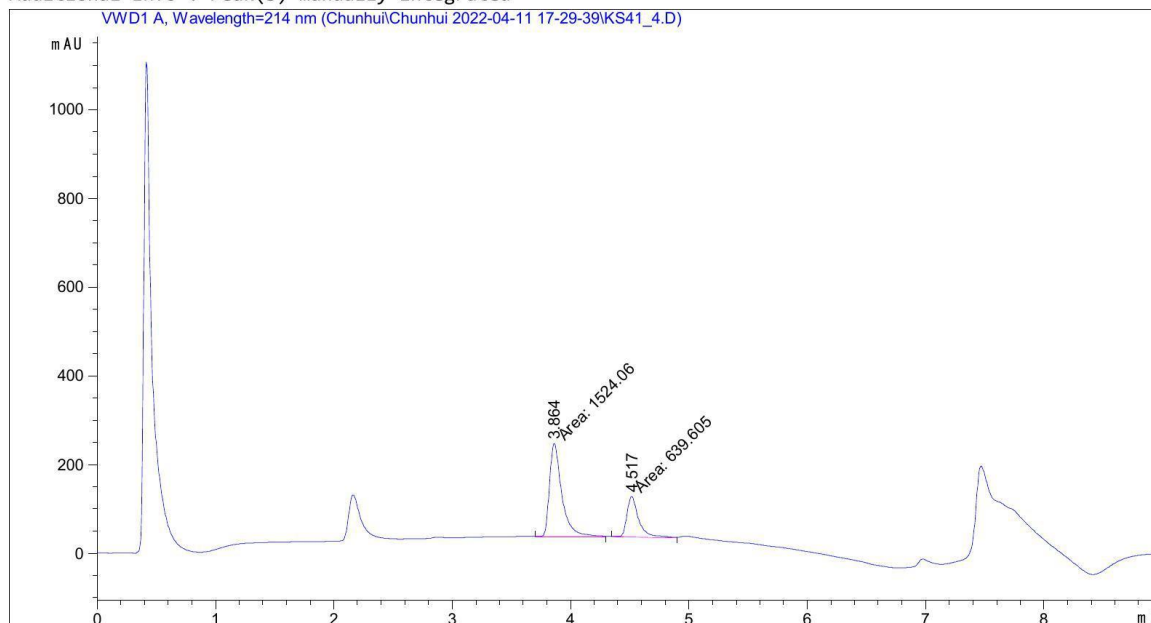

=====

Area Percent Report

=====

|            |   |        |
|------------|---|--------|
| Sorted By  | : | Signal |
| Multiplier | : | 1.0000 |
| Dilution   | : | 1.0000 |

Use Multiplier & Dilution Factor with ISTDs

Signal 1: VWD1 A, Wavelength=214 nm

| Peak # | RetTime [min] | Type | Width [min] | Area [mAU*s] | Height [mAU] | Area %  |
|--------|---------------|------|-------------|--------------|--------------|---------|
| 1      | 3.864         | MM   | 0.1211      | 1524.06360   | 209.74847    | 70.4389 |
| 2      | 4.517         | MM   | 0.1164      | 639.60516    | 91.58849     | 29.5611 |

Totals : 2163.66876 301.33696

=====

\*\*\* End of Report \*\*\*

```

=====
Acq. Operator   : SYSTEM                      Seq. Line :    8
Acq. Instrument : Timon HPLC                 Location  :   16
Injection Date  : 11/04/2022 18:43:29       Inj       :    1
                                           Inj Volume: 5.000 µl
Method         : C:\Chem32\1\Data\Chunhui\Chunhui 2022-04-11 17-29-39\CY_KS.M (Sequence
Method)
Last changed   : 11/04/2022 17:29:40 by SYSTEM
Additional Info : Peak(s) manually integrated
  
```

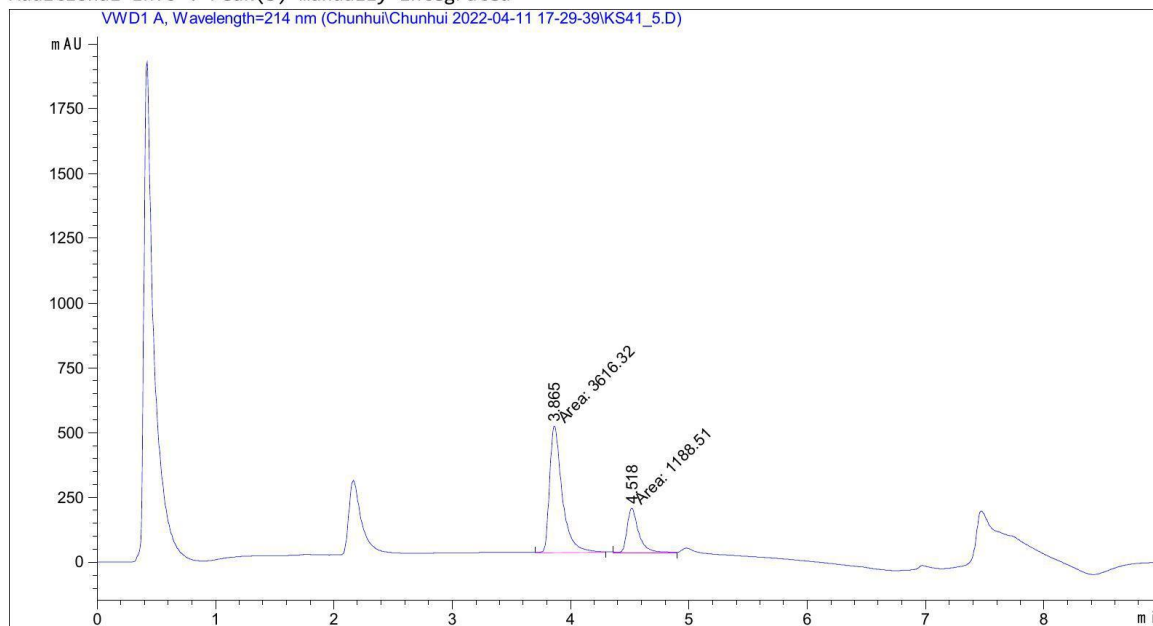

=====  
 Area Percent Report  
 =====

```

Sorted By      : Signal
Multiplier     : 1.0000
Dilution      : 1.0000
Use Multiplier & Dilution Factor with ISTDs
  
```

Signal 1: VWD1 A, Wavelength=214 nm

| Peak # | RetTime [min] | Type | Width [min] | Area [mAU*s] | Height [mAU] | Area %  |
|--------|---------------|------|-------------|--------------|--------------|---------|
| 1      | 3.865         | MM   | 0.1234      | 3616.32349   | 488.32648    | 75.2643 |
| 2      | 4.518         | MM   | 0.1154      | 1188.50659   | 171.64297    | 24.7357 |

Totals :                            4804.83008   659.96945

=====  
 \*\*\* End of Report \*\*\*

```
=====
Acq. Operator   : SYSTEM                      Seq. Line :    9
Acq. Instrument : Timon HPLC                  Location  :   17
Injection Date  : 11/04/2022 18:53:49        Inj       :    1
                                           Inj Volume: 5.000 µl
Method          : C:\Chem32\1\Data\Chunhui\Chunhui 2022-04-11 17-29-39\CY_KS.M (Sequence
                  Method)
Last changed    : 11/04/2022 17:29:40 by SYSTEM
Additional Info : Peak(s) manually integrated
=====
```

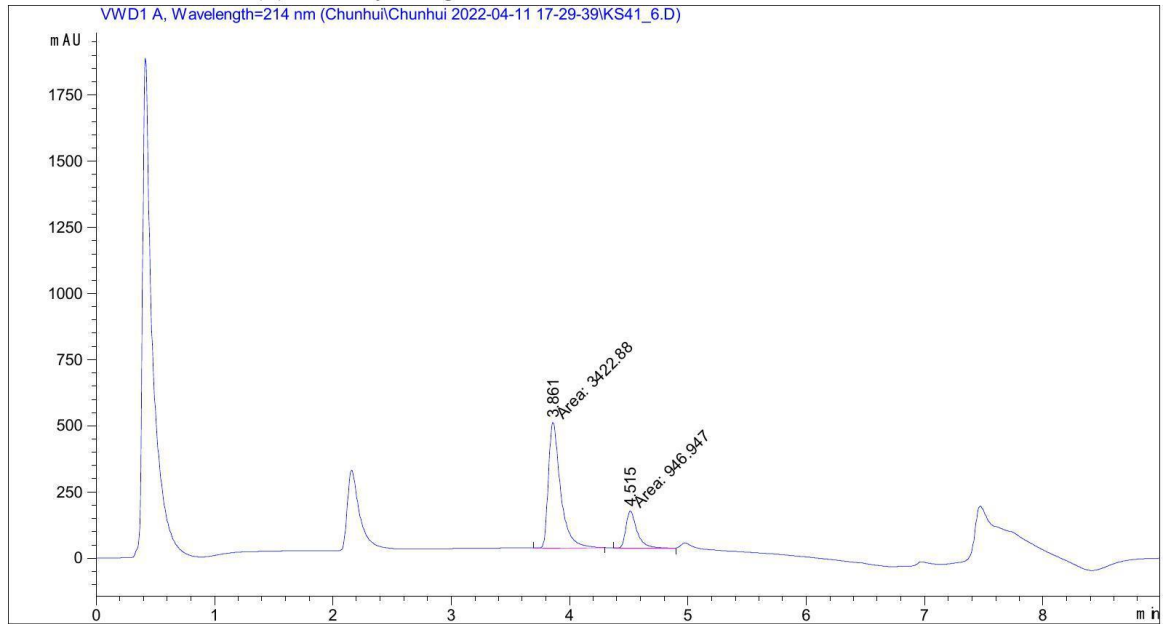

=====  
Area Percent Report  
=====

Sorted By : Signal  
Multiplier : 1.0000  
Dilution : 1.0000  
Use Multiplier & Dilution Factor with ISTDs

Signal 1: VWD1 A, Wavelength=214 nm

| Peak # | RetTime [min] | Type | Width [min] | Area [mAU*s] | Height [mAU] | Area %  |
|--------|---------------|------|-------------|--------------|--------------|---------|
| 1      | 3.861         | MM   | 0.1198      | 3422.88306   | 476.04437    | 78.3299 |
| 2      | 4.515         | MM   | 0.1119      | 946.94714    | 141.03406    | 21.6701 |

Totals :                      4369.83020    617.07843

=====  
\*\*\* End of Report \*\*\*









```

=====
Acq. Operator   : SYSTEM                      Seq. Line :   14
Acq. Instrument : Timon HPLC                  Location  :   21
Injection Date  : 11/04/2022 19:45:40       Inj       :    1
                                           Inj Volume: 5.000 µl
Method         : C:\Chem32\1\Data\Chunhui\Chunhui 2022-04-11 17-29-39\CY_KS.M (Sequence
                Method)
Last changed    : 11/04/2022 17:29:40 by SYSTEM
Additional Info : Peak(s) manually integrated
  
```

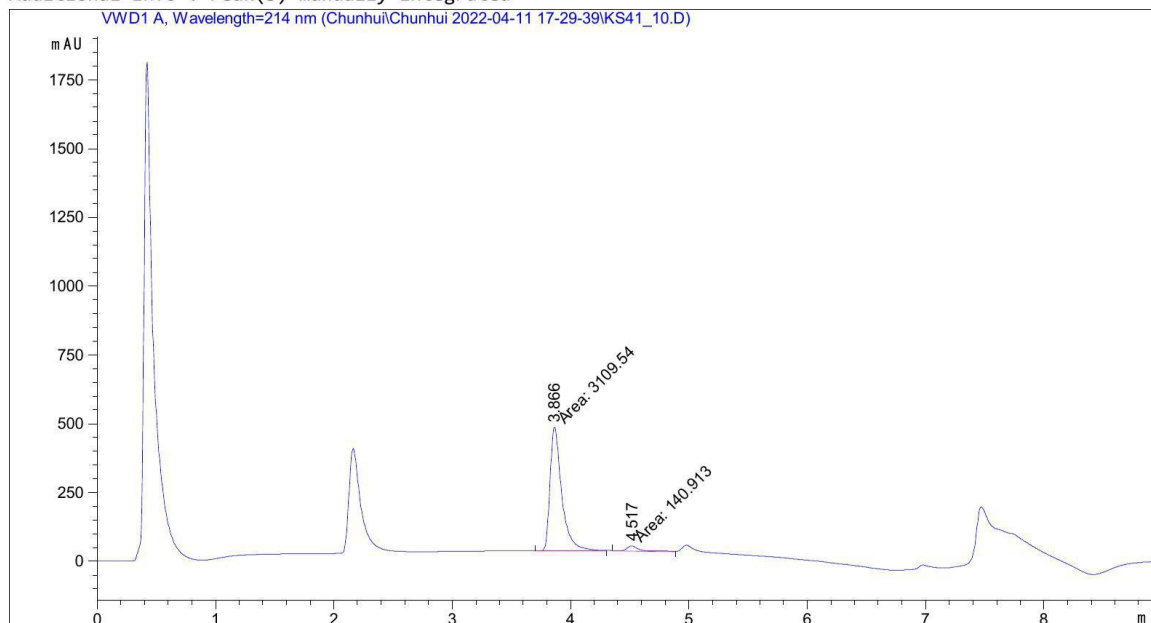

=====  
 Area Percent Report  
 =====

```

Sorted By      :      Signal
Multiplier     :      1.0000
Dilution       :      1.0000
Use Multiplier & Dilution Factor with ISTDs
  
```

Signal 1: VWD1 A, Wavelength=214 nm

| Peak # | RetTime [min] | Type | Width [min] | Area [mAU*s] | Height [mAU] | Area %  |
|--------|---------------|------|-------------|--------------|--------------|---------|
| 1      | 3.866         | MM   | 0.1153      | 3109.54443   | 449.30341    | 95.6648 |
| 2      | 4.517         | MM   | 0.1245      | 140.91266    | 18.85712     | 4.3352  |

Totals :                                    3250.45709   468.16052

=====  
 \*\*\* End of Report \*\*\*

**Figure 9 – Borylation reaction with 0.5 mol% catalyst loading under Nitrogen**

```

=====
Acq. Operator   : SYSTEM                      Seq. Line : 12
Acq. Instrument : Timon HPLC                  Location  : 70
Injection Date  : 04/04/2022 21:23:24        Inj       : 1
                                           Inj Volume: 5.000 µl
Method          : C:\Chem32\1\Data\Chunhui\Chunhui 2022-04-04 19-28-28\CY_KS.M (Sequence
                Method)
Last changed    : 04/04/2022 19:28:29 by SYSTEM
Additional Info  : Peak(s) manually integrated
  
```

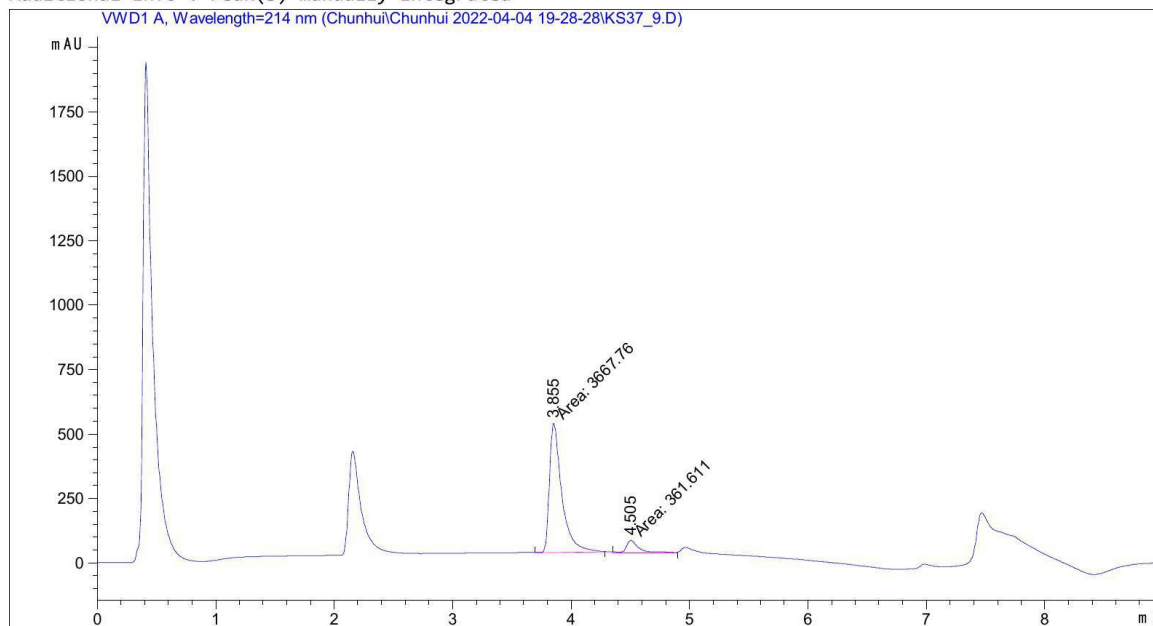

=====  
 Area Percent Report  
 =====

```

Sorted By      : Signal
Multiplier     : 1.0000
Dilution       : 1.0000
Use Multiplier & Dilution Factor with ISTDs
  
```

Signal 1: VWD1 A, Wavelength=214 nm

| Peak # | RetTime [min] | Type | Width [min] | Area [mAU*s] | Height [mAU] | Area %  |
|--------|---------------|------|-------------|--------------|--------------|---------|
| 1      | 3.855         | MM   | 0.1214      | 3667.75562   | 503.39334    | 91.0256 |
| 2      | 4.505         | MM   | 0.1250      | 361.61118    | 48.22803     | 8.9744  |

Totals :                    4029.36679   551.62137

=====  
 \*\*\* End of Report \*\*\*













```

=====
Acq. Operator   : SYSTEM                      Seq. Line :    5
Acq. Instrument : Timon HPLC                  Location  :   64
Injection Date  : 04/04/2022 20:10:48        Inj       :    1
                                           Inj Volume: 5.000 µl
Method          : C:\Chem32\1\Data\Chunhui\Chunhui 2022-04-04 19-28-28\CY_KS.M (Sequence
                : Method)
Last changed    : 04/04/2022 19:28:29 by SYSTEM
Additional Info  : Peak(s) manually integrated
  
```

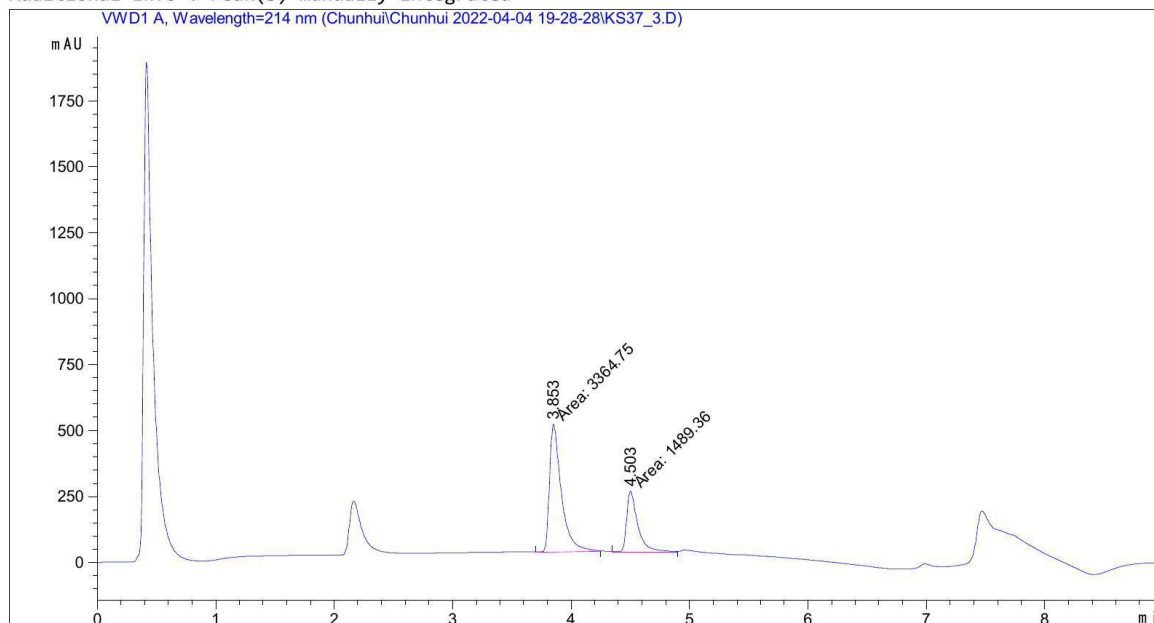

=====  
 Area Percent Report  
 =====

```

Sorted By      : Signal
Multiplier     : 1.0000
Dilution      : 1.0000
Use Multiplier & Dilution Factor with ISTDs
  
```

Signal 1: VWD1 A, Wavelength=214 nm

| Peak # | RetTime [min] | Type | Width [min] | Area [mAU*s] | Height [mAU] | Area %  |
|--------|---------------|------|-------------|--------------|--------------|---------|
| 1      | 3.853         | MM   | 0.1160      | 3364.74756   | 483.38730    | 69.3175 |
| 2      | 4.503         | MM   | 0.1079      | 1489.36377   | 230.13171    | 30.6825 |

Totals :                    4854.11133   713.51901

=====  
 \*\*\* End of Report \*\*\*

```

=====
Acq. Operator   : SYSTEM                      Seq. Line :    4
Acq. Instrument : Timon HPLC                  Location  :   63
Injection Date  : 04/04/2022 20:00:27        Inj       :    1
                                           Inj Volume: 5.000 µl
Method          : C:\Chem32\1\Data\Chunhui\Chunhui 2022-04-04 19-28-28\CY_KS.M (Sequence
                Method)
Last changed    : 04/04/2022 19:28:29 by SYSTEM
Additional Info  : Peak(s) manually integrated
  
```

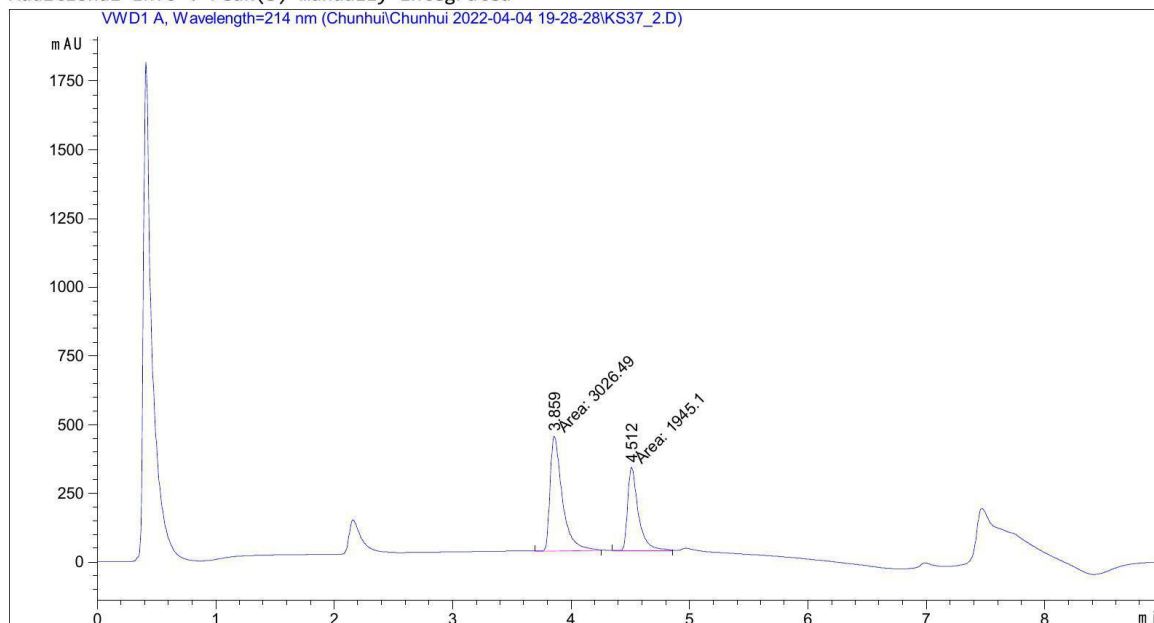

=====  
 Area Percent Report  
 =====

```

Sorted By      :      Signal
Multiplier     :      1.0000
Dilution      :      1.0000
Use Multiplier & Dilution Factor with ISTDs
  
```

Signal 1: VWD1 A, Wavelength=214 nm

| Peak # | RetTime [min] | Type | Width [min] | Area [mAU*s] | Height [mAU] | Area %  |
|--------|---------------|------|-------------|--------------|--------------|---------|
| 1      | 3.859         | MM   | 0.1206      | 3026.49292   | 418.28613    | 60.8757 |
| 2      | 4.512         | MM   | 0.1064      | 1945.09839   | 304.58002    | 39.1243 |

Totals :                                    4971.59131   722.86615

=====  
 \*\*\* End of Report \*\*\*



```

=====
Acq. Operator   : SYSTEM                      Seq. Line :    2
Acq. Instrument : Timon HPLC                  Location  :   61
Injection Date  : 04/04/2022 19:39:43       Inj       :    1
                                           Inj Volume: 5.000 µl
Method         : C:\Chem32\1\Data\Chunhui\Chunhui 2022-04-04 19-28-28\CY_KS.M (Sequence
                Method)
Last changed    : 04/04/2022 19:28:29 by SYSTEM
Additional Info : Peak(s) manually integrated
  
```

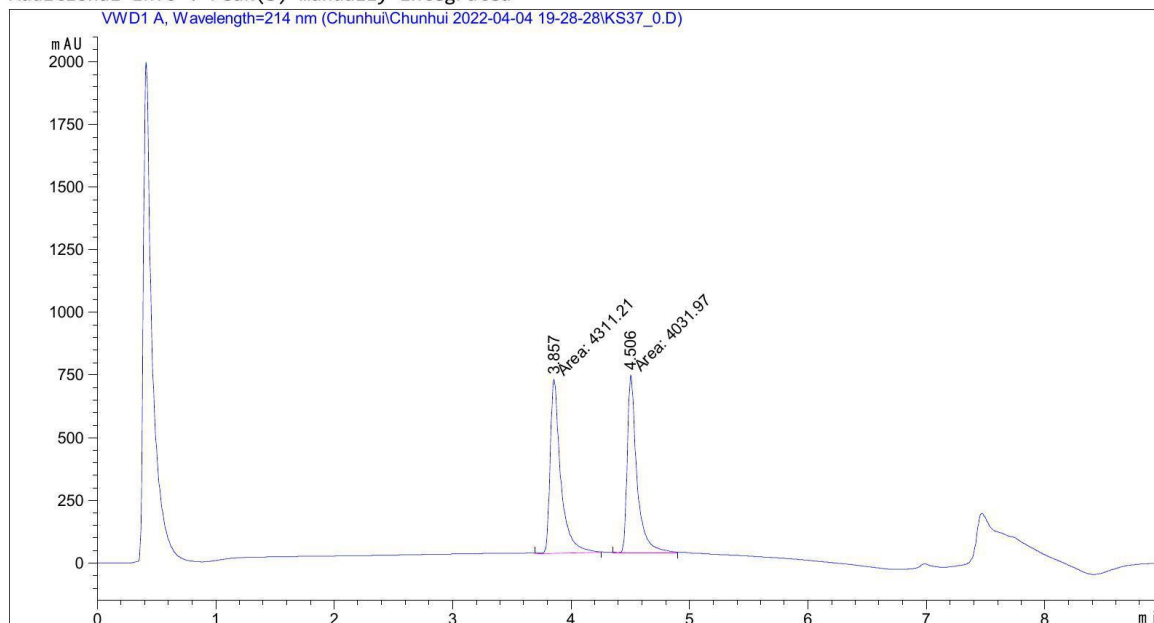

=====  
 Area Percent Report  
 =====

```

Sorted By      :      Signal
Multiplier     :      1.0000
Dilution      :      1.0000
Use Multiplier & Dilution Factor with ISTDs
  
```

Signal 1: VWD1 A, Wavelength=214 nm

| Peak # | RetTime [min] | Type | Width [min] | Area [mAU*s] | Height [mAU] | Area %  |
|--------|---------------|------|-------------|--------------|--------------|---------|
| 1      | 3.857         | MM   | 0.1035      | 4311.21436   | 694.40619    | 51.6735 |
| 2      | 4.506         | MM   | 0.0946      | 4031.96948   | 710.20667    | 48.3265 |

Totals :                    8343.18384 1404.61285

=====  
 \*\*\* End of Report \*\*\*





**Figure 9 – Borylation reaction with 0.5 mol% catalyst loading and exposed to air**



















```

=====
Acq. Operator   : SYSTEM                      Seq. Line :   16
Acq. Instrument : Timon HPLC                 Location  :    73
Injection Date  : 04/04/2022 22:04:57       Inj       :    1
                                           Inj Volume: 5.000 µl
Method         : C:\Chem32\1\Data\Chunhui\Chunhui 2022-04-04 19-28-28\CY_KS.M (Sequence
                Method)
Last changed    : 04/04/2022 19:28:29 by SYSTEM
Additional Info : Peak(s) manually integrated
  
```

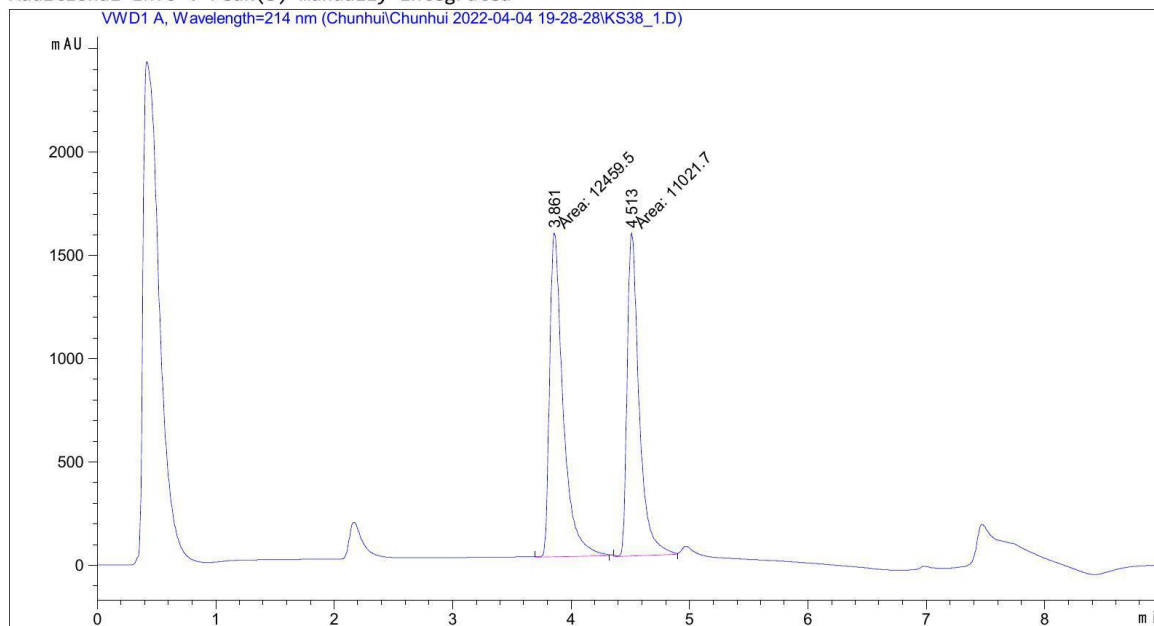

=====  
 Area Percent Report  
 =====

```

Sorted By      :      Signal
Multiplier     :      1.0000
Dilution      :      1.0000
Use Multiplier & Dilution Factor with ISTDs
  
```

Signal 1: VWD1 A, Wavelength=214 nm

| Peak # | RetTime [min] | Type | Width [min] | Area [mAU*s] | Height [mAU] | Area %  |
|--------|---------------|------|-------------|--------------|--------------|---------|
| 1      | 3.861         | MM   | 0.1323      | 1.24595e4    | 1569.94812   | 53.0615 |
| 2      | 4.513         | MM   | 0.1174      | 1.10217e4    | 1564.63013   | 46.9385 |

Totals :                                    2.34812e4  3134.57825

=====  
 \*\*\* End of Report \*\*\*





**Figure 10 – Borylation reaction with 0.2 mol% catalyst loading under Argon**

```

=====
Acq. Operator   : SYSTEM                      Seq. Line :   20
Acq. Instrument : Timon HPLC                  Location  :   20
Injection Date  : 24/05/2022 21:47:16        Inj       :    1
                                           Inj Volume: 5.000 µl

Method         : C:\Chem32\1\Data\Prosperity\Prosperity 2022-05-24 17-16-59\CY_KS.M (
                Sequence Method)
Last changed   : 24/05/2022 18:23:51 by SYSTEM
Additional Info: Peak(s) manually integrated
  
```

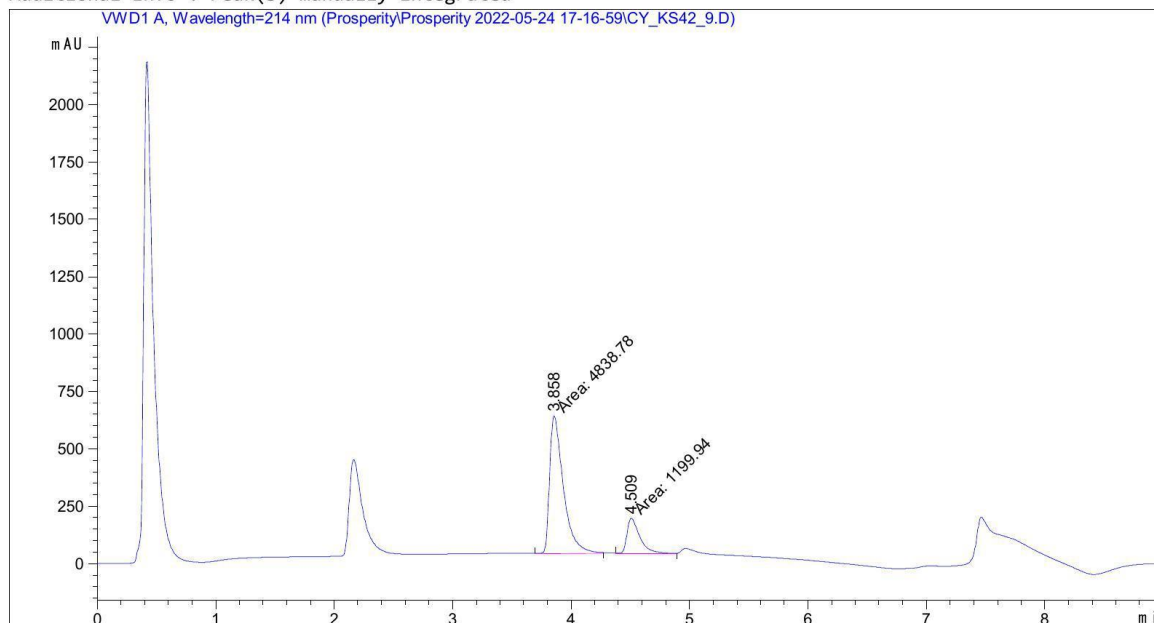

=====  
 Area Percent Report  
 =====

```

Sorted By      :      Signal
Multiplier     :      1.0000
Dilution       :      1.0000
Use Multiplier & Dilution Factor with ISTDs
  
```

Signal 1: VWD1 A, Wavelength=214 nm

| Peak # | RetTime [min] | Type | Width [min] | Area [mAU*s] | Height [mAU] | Area %  |
|--------|---------------|------|-------------|--------------|--------------|---------|
| 1      | 3.858         | MM   | 0.1344      | 4838.78174   | 600.08698    | 80.1293 |
| 2      | 4.509         | MM   | 0.1293      | 1199.93762   | 154.68846    | 19.8707 |

Totals :                    6038.71936   754.77544

=====  
 \*\*\* End of Report \*\*\*

```

=====
Acq. Operator   : SYSTEM                      Seq. Line :   19
Acq. Instrument : Timon HPLC                 Location  :   19
Injection Date  : 24/05/2022 21:36:51       Inj       :    1
                                           Inj Volume: 5.000 µl
Method         : C:\Chem32\1\Data\Prosperity\Prosperity 2022-05-24 17-16-59\CY_KS.M (
                Sequence Method)
Last changed   : 24/05/2022 18:23:51 by SYSTEM
Additional Info: Peak(s) manually integrated
  
```

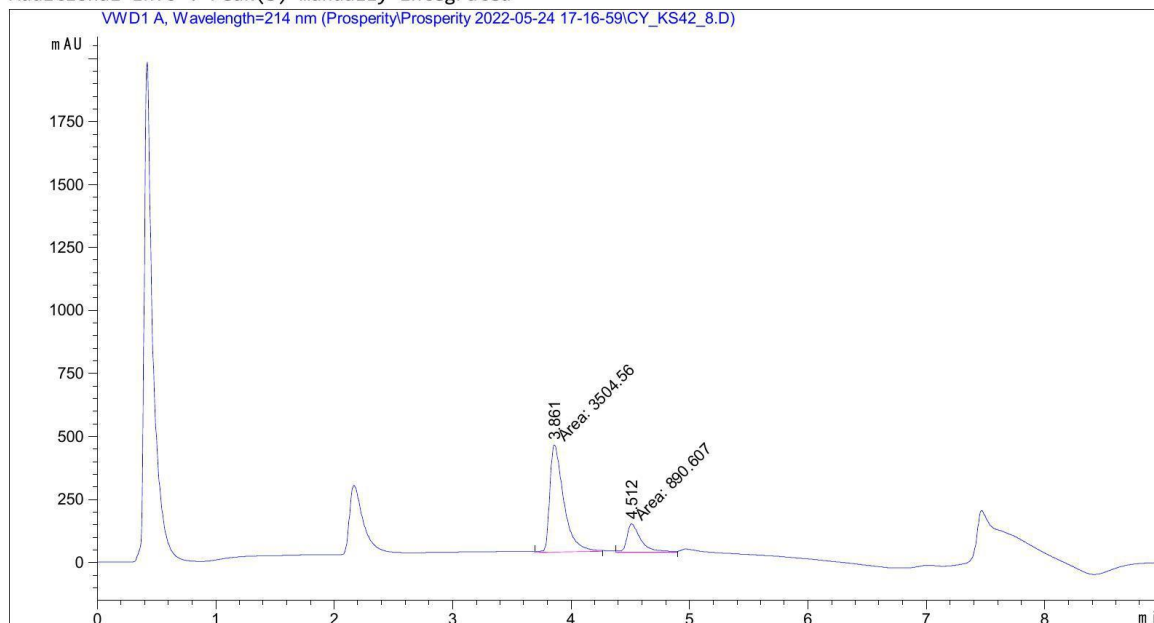

=====  
 Area Percent Report  
 =====

```

Sorted By      :      Signal
Multiplier     :      1.0000
Dilution       :      1.0000
Use Multiplier & Dilution Factor with ISTDs
  
```

Signal 1: VWD1 A, Wavelength=214 nm

| Peak # | RetTime [min] | Type | Width [min] | Area [mAU*s] | Height [mAU] | Area %  |
|--------|---------------|------|-------------|--------------|--------------|---------|
| 1      | 3.861         | MM   | 0.1371      | 3504.55957   | 425.98560    | 79.7367 |
| 2      | 4.512         | MM   | 0.1337      | 890.60712    | 110.99963    | 20.2633 |

Totals :                    4395.16669   536.98522

=====  
 \*\*\* End of Report \*\*\*

```

=====
Acq. Operator   : SYSTEM                      Seq. Line :   18
Acq. Instrument : Timon HPLC                  Location  :   18
Injection Date  : 24/05/2022 21:26:29        Inj       :    1
                                           Inj Volume: 5.000 µl
Method         : C:\Chem32\1\Data\Prosperity\Prosperity 2022-05-24 17-16-59\CY_KS.M (
                Sequence Method)
Last changed    : 24/05/2022 18:23:51 by SYSTEM
Additional Info  : Peak(s) manually integrated
  
```

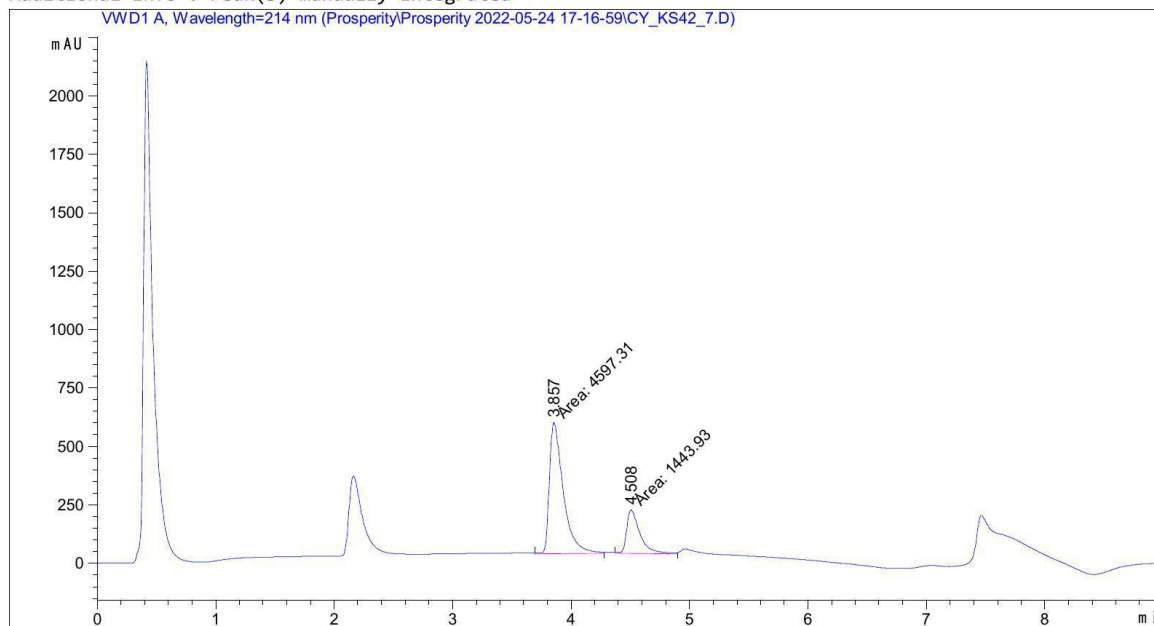

=====  
 Area Percent Report  
 =====

```

Sorted By      :      Signal
Multiplier     :      1.0000
Dilution      :      1.0000
Use Multiplier & Dilution Factor with ISTDs
  
```

Signal 1: VWD1 A, Wavelength=214 nm

| Peak # | RetTime [min] | Type | Width [min] | Area [mAU*s] | Height [mAU] | Area %  |
|--------|---------------|------|-------------|--------------|--------------|---------|
| 1      | 3.857         | MM   | 0.1362      | 4597.30908   | 562.39502    | 76.0987 |
| 2      | 4.508         | MM   | 0.1290      | 1443.93445   | 186.53908    | 23.9013 |

Totals :                                    6041.24353   748.93410

=====  
 \*\*\* End of Report \*\*\*



```
=====
Acq. Operator   : SYSTEM                      Seq. Line :   17
Acq. Instrument : Timon HPLC                 Location  :   17
Injection Date  : 24/05/2022 21:16:09       Inj       :    1
                                           Inj Volume: 5.000 µl
Method          : C:\Chem32\1\Data\Prosperity\Prosperity 2022-05-24 17-16-59\CY_KS.M (
                : Sequence Method)
Last changed    : 24/05/2022 18:23:51 by SYSTEM
Additional Info  : Peak(s) manually integrated
=====
```

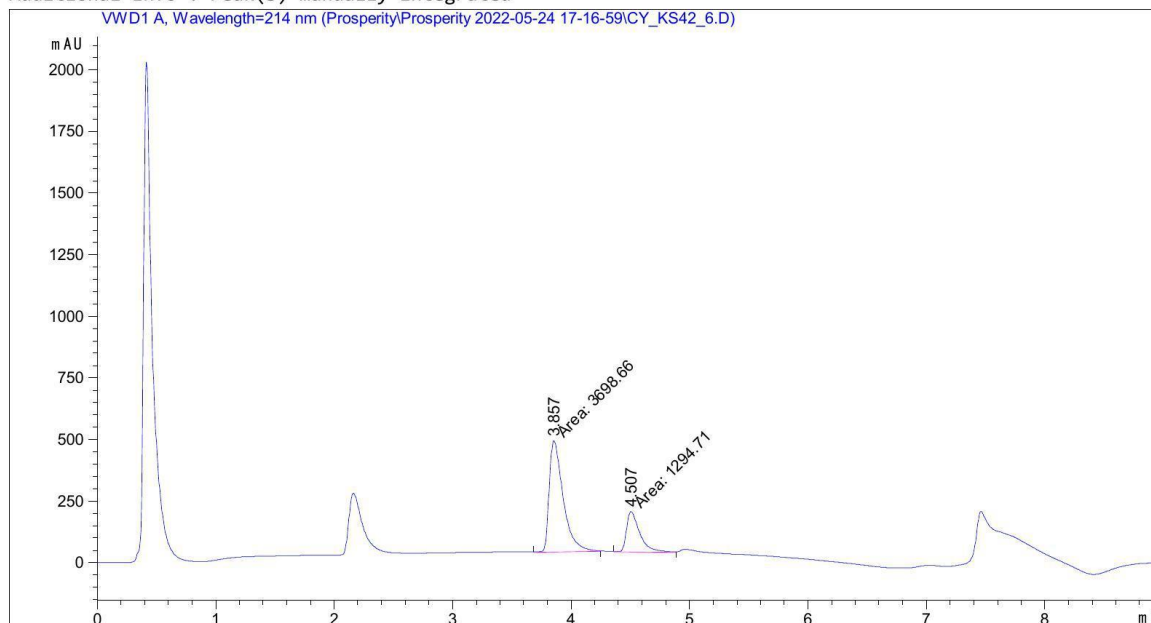

```
=====
                          Area Percent Report
=====
```

```
Sorted By           :      Signal
Multiplier          :      1.0000
Dilution            :      1.0000
Use Multiplier & Dilution Factor with ISTDs
```

Signal 1: VWD1 A, Wavelength=214 nm

| Peak # | RetTime [min] | Type | Width [min] | Area [mAU*s] | Height [mAU] | Area %  |
|--------|---------------|------|-------------|--------------|--------------|---------|
| 1      | 3.857         | MM   | 0.1365      | 3698.65576   | 451.48514    | 74.0714 |
| 2      | 4.507         | MM   | 0.1310      | 1294.71008   | 164.70125    | 25.9286 |

Totals :                                    4993.36584   616.18639

```
=====
*** End of Report ***
=====
```

```

=====
Acq. Operator   : SYSTEM                      Seq. Line : 16
Acq. Instrument : Timon HPLC                  Location  : 16
Injection Date  : 24/05/2022 21:05:49       Inj       : 1
                                           Inj Volume: 5.000 µl
Method          : C:\Chem32\1\Data\Prosperity\Prosperity 2022-05-24 17-16-59\CY_KS.M (
                : Sequence Method)
Last changed    : 24/05/2022 18:23:51 by SYSTEM
Additional Info  : Peak(s) manually integrated
  
```

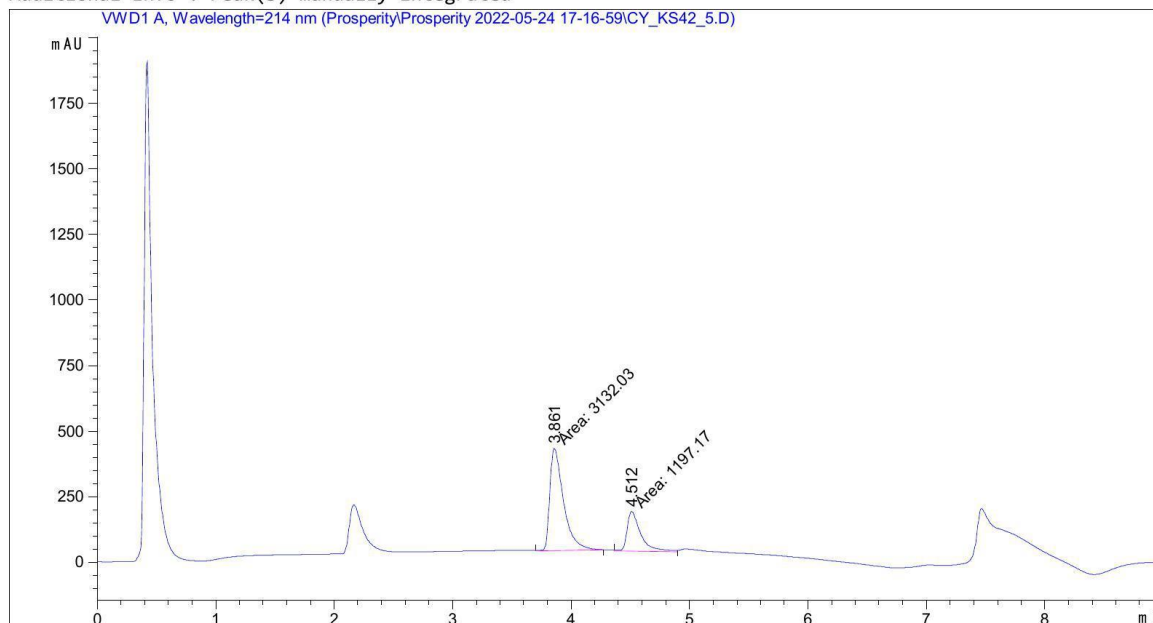

=====  
 Area Percent Report  
 =====

```

Sorted By      : Signal
Multiplier     : 1.0000
Dilution      : 1.0000
Use Multiplier & Dilution Factor with ISTDs
  
```

Signal 1: VWD1 A, Wavelength=214 nm

| Peak # | RetTime [min] | Type | Width [min] | Area [mAU*s] | Height [mAU] | Area %  |
|--------|---------------|------|-------------|--------------|--------------|---------|
| 1      | 3.861         | MM   | 0.1342      | 3132.03345   | 388.91037    | 72.3466 |
| 2      | 4.512         | MM   | 0.1326      | 1197.17261   | 150.51689    | 27.6534 |

Totals :                    4329.20605   539.42726

=====  
 \*\*\* End of Report \*\*\*

```

=====
Acq. Operator   : SYSTEM                      Seq. Line :   14
Acq. Instrument : Timon HPLC                  Location  :   15
Injection Date  : 24/05/2022 20:45:03        Inj       :    1
                                           Inj Volume: 5.000 µl
Method         : C:\Chem32\1\Data\Prosperity\Prosperity 2022-05-24 17-16-59\CY_KS.M (
                Sequence Method)
Last changed   : 24/05/2022 18:23:51 by SYSTEM
Additional Info : Peak(s) manually integrated
  
```

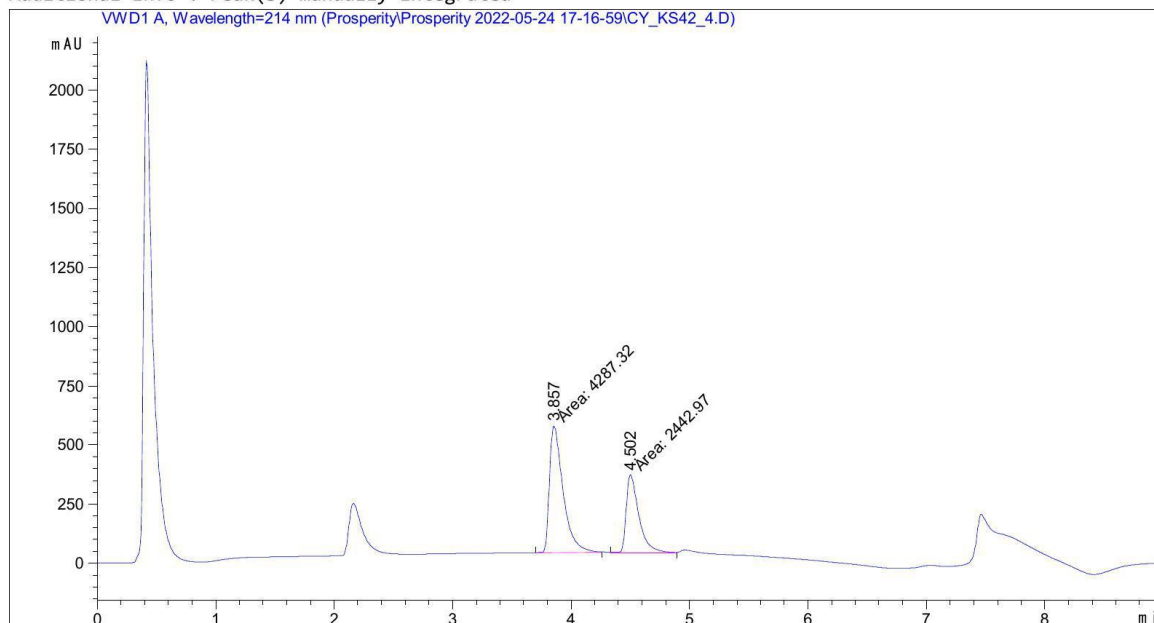

=====  
 Area Percent Report  
 =====

```

Sorted By      :      Signal
Multiplier     :      1.0000
Dilution      :      1.0000
Use Multiplier & Dilution Factor with ISTDs
  
```

Signal 1: VWD1 A, Wavelength=214 nm

| Peak # | RetTime [min] | Type | Width [min] | Area [mAU*s] | Height [mAU] | Area %  |
|--------|---------------|------|-------------|--------------|--------------|---------|
| 1      | 3.857         | MM   | 0.1334      | 4287.31885   | 535.61859    | 63.7018 |
| 2      | 4.502         | MM   | 0.1233      | 2442.97363   | 330.28552    | 36.2982 |

Totals :                    6730.29248   865.90411

=====  
 \*\*\* End of Report \*\*\*

```

=====
Acq. Operator   : SYSTEM                      Seq. Line :   13
Acq. Instrument : Timon HPLC                  Location  :   14
Injection Date  : 24/05/2022 20:34:44        Inj       :    1
                                           Inj Volume: 5.000 µl
Method         : C:\Chem32\1\Data\Prosperity\Prosperity 2022-05-24 17-16-59\CY_KS.M (
                Sequence Method)
Last changed   : 24/05/2022 18:23:51 by SYSTEM
Additional Info : Peak(s) manually integrated
  
```

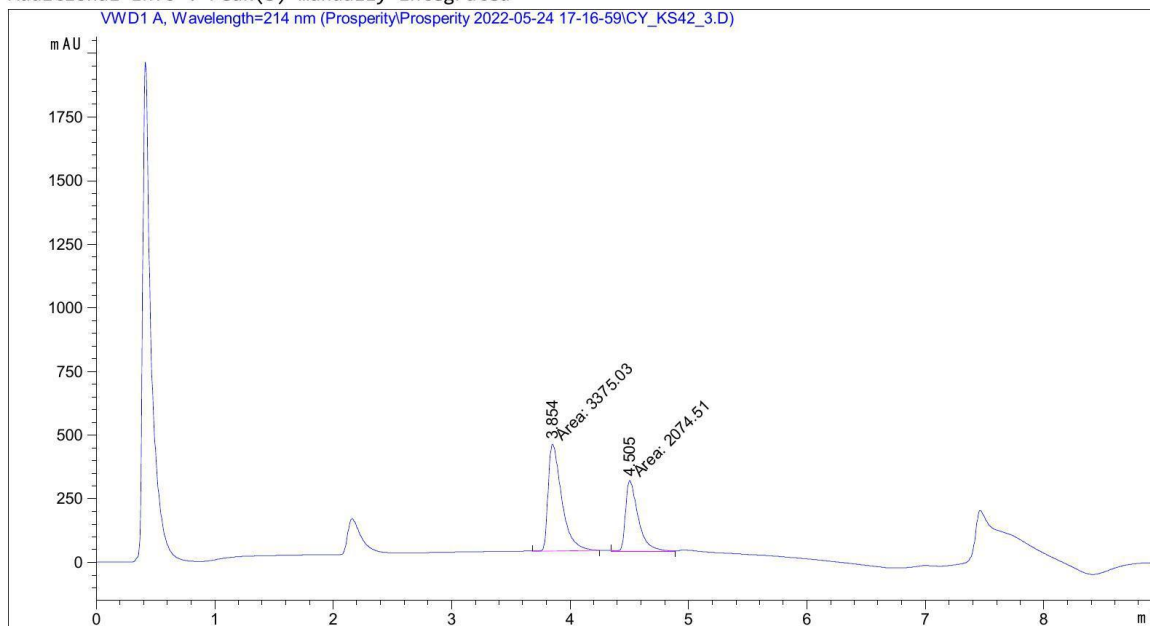

=====  
 Area Percent Report  
 =====

```

Sorted By      :      Signal
Multiplier     :      1.0000
Dilution      :      1.0000
Use Multiplier & Dilution Factor with ISTDs
  
```

Signal 1: VWD1 A, Wavelength=214 nm

| Peak # | RetTime [min] | Type | Width [min] | Area [mAU*s] | Height [mAU] | Area %  |
|--------|---------------|------|-------------|--------------|--------------|---------|
| 1      | 3.854         | MM   | 0.1334      | 3375.03003   | 421.68637    | 61.9324 |
| 2      | 4.505         | MM   | 0.1241      | 2074.50513   | 278.63278    | 38.0676 |

Totals :                    5449.53516   700.31915

=====  
 \*\*\* End of Report \*\*\*

```
=====
Acq. Operator   : SYSTEM                      Seq. Line : 12
Acq. Instrument : Timon HPLC                  Location  : 13
Injection Date  : 24/05/2022 20:24:24        Inj       : 1
                                                Inj Volume: 5.000 µl
Method          : C:\Chem32\1\Data\Prosperity\Prosperity 2022-05-24 17-16-59\CY_KS.M (
                Sequence Method)
Last changed    : 24/05/2022 18:23:51 by SYSTEM
Additional Info  : Peak(s) manually integrated
=====
```

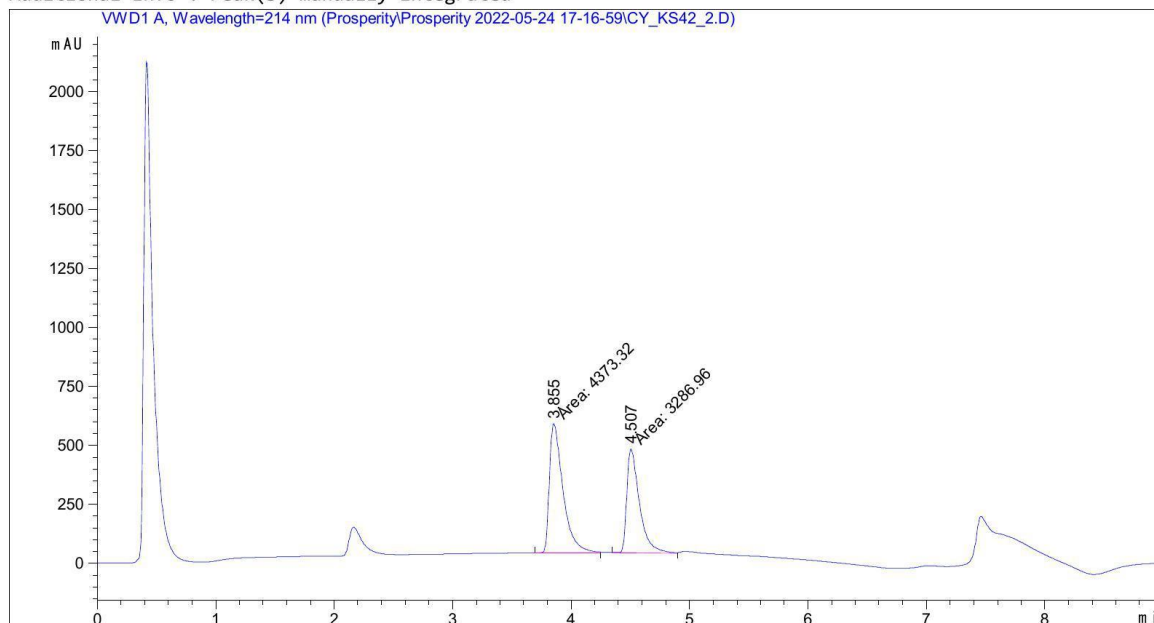

```
=====
Area Percent Report
=====
```

```
Sorted By      : Signal
Multiplier     : 1.0000
Dilution       : 1.0000
Use Multiplier & Dilution Factor with ISTDs
```

Signal 1: VWD1 A, Wavelength=214 nm

| Peak # | RetTime [min] | Type | Width [min] | Area [mAU*s] | Height [mAU] | Area %  |
|--------|---------------|------|-------------|--------------|--------------|---------|
| 1      | 3.855         | MM   | 0.1327      | 4373.31787   | 549.09906    | 57.0909 |
| 2      | 4.507         | MM   | 0.1239      | 3286.96021   | 442.31119    | 42.9091 |

```
Totals :                7660.27808  991.41025
```

```
=====
*** End of Report ***
```

```

=====
Acq. Operator   : SYSTEM                      Seq. Line :   11
Acq. Instrument : Timon HPLC                  Location  :   12
Injection Date  : 24/05/2022 20:14:06        Inj       :    1
                                           Inj Volume: 5.000 µl
Method          : C:\Chem32\1\Data\Prosperity\Prosperity 2022-05-24 17-16-59\CY_KS.M (
                : Sequence Method)
Last changed    : 24/05/2022 18:23:51 by SYSTEM
Additional Info  : Peak(s) manually integrated
  
```

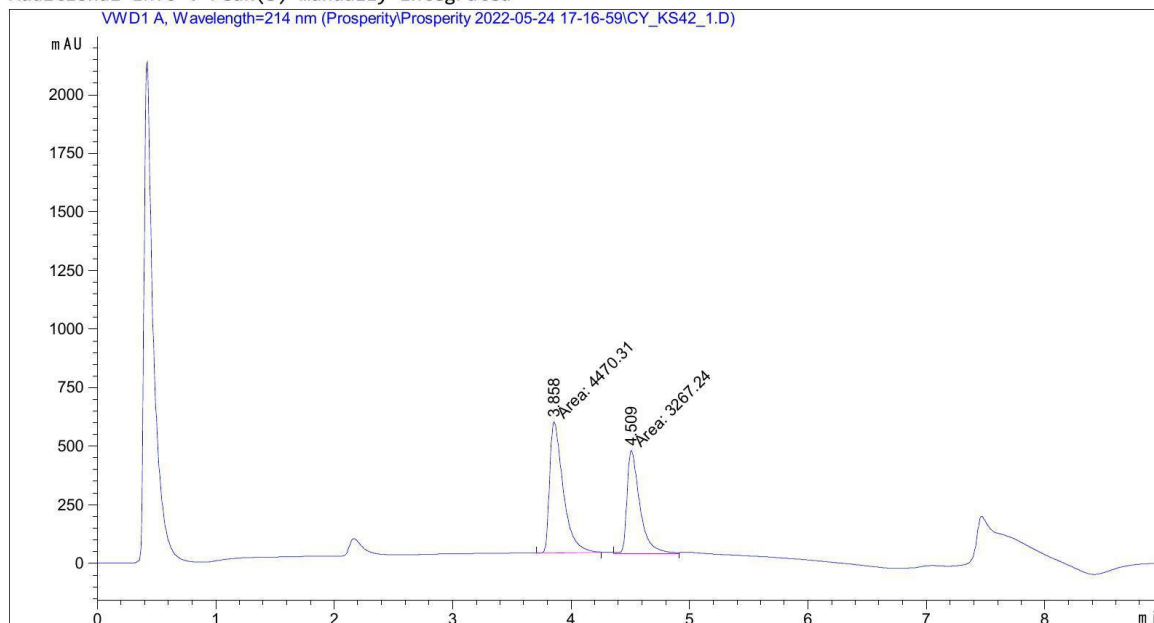

=====  
 Area Percent Report  
 =====

```

Sorted By      : Signal
Multiplier     : 1.0000
Dilution       : 1.0000
Use Multiplier & Dilution Factor with ISTDs
  
```

Signal 1: VWD1 A, Wavelength=214 nm

| Peak # | RetTime [min] | Type | Width [min] | Area [mAU*s] | Height [mAU] | Area %  |
|--------|---------------|------|-------------|--------------|--------------|---------|
| 1      | 3.858         | MM   | 0.1331      | 4470.31348   | 559.74695    | 57.7743 |
| 2      | 4.509         | MM   | 0.1241      | 3267.23755   | 438.69598    | 42.2257 |

Totals :                    7737.55103  998.44293

=====  
 \*\*\* End of Report \*\*\*

```

=====
Acq. Operator   : SYSTEM                      Seq. Line :   10
Acq. Instrument : Timon HPLC                  Location  :   11
Injection Date  : 24/05/2022 20:03:45        Inj       :    1
                                           Inj Volume: 5.000 µl
Method         : C:\Chem32\1\Data\Prosperity\Prosperity 2022-05-24 17-16-59\CY_KS.M (
                Sequence Method)
Last changed   : 24/05/2022 18:23:51 by SYSTEM
Additional Info: Peak(s) manually integrated
  
```

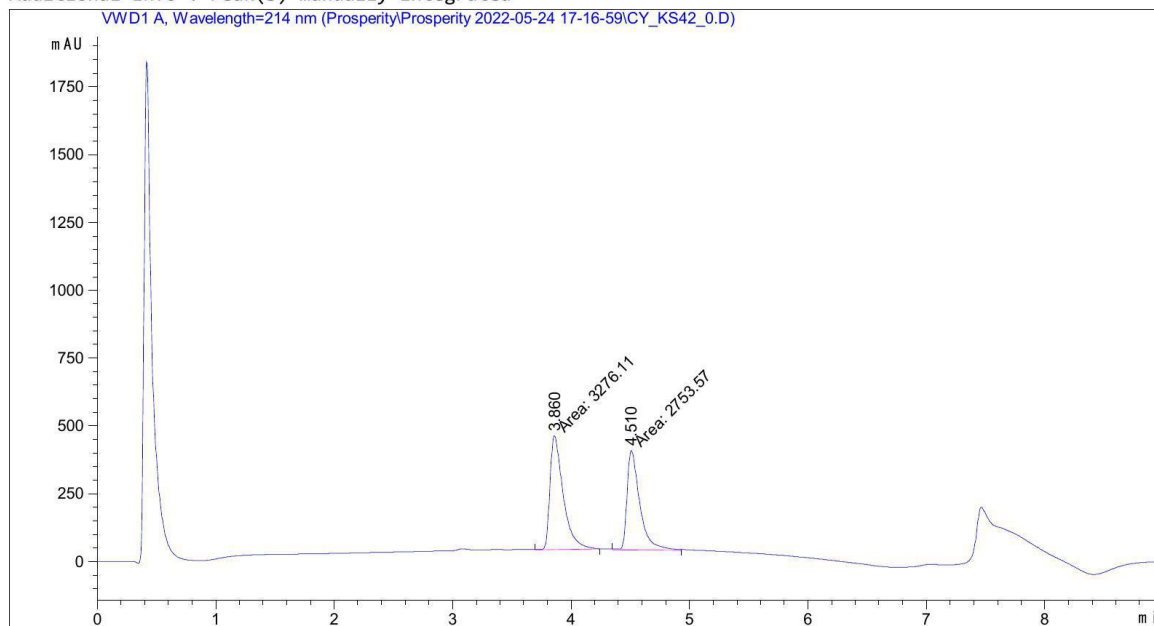

=====  
 Area Percent Report  
 =====

```

Sorted By      :      Signal
Multiplier     :      1.0000
Dilution      :      1.0000
Use Multiplier & Dilution Factor with ISTDs
  
```

Signal 1: VWD1 A, Wavelength=214 nm

| Peak # | RetTime [min] | Type | Width [min] | Area [mAU*s] | Height [mAU] | Area %  |
|--------|---------------|------|-------------|--------------|--------------|---------|
| 1      | 3.860         | MM   | 0.1299      | 3276.11304   | 420.18365    | 54.3331 |
| 2      | 4.510         | MM   | 0.1250      | 2753.57397   | 367.09586    | 45.6669 |

Totals :                    6029.68701  787.27951

=====  
 \*\*\* End of Report \*\*\*





**Figure 10 – Borylation reaction with 0.2 mol% catalyst loading under Nitrogen**

```

=====
Acq. Operator   : SYSTEM                      Seq. Line : 23
Acq. Instrument : Timon HPLC                  Location  : 22
Injection Date  : 24/05/2022 22:18:24        Inj       : 1
                                           Inj Volume: 5.000 µl
Method          : C:\Chem32\1\Data\Prosperity\Prosperity 2022-05-24 17-16-59\CY_KS.M (
                  Sequence Method)
Last changed    : 24/05/2022 18:23:51 by SYSTEM
Additional Info  : Peak(s) manually integrated
  
```

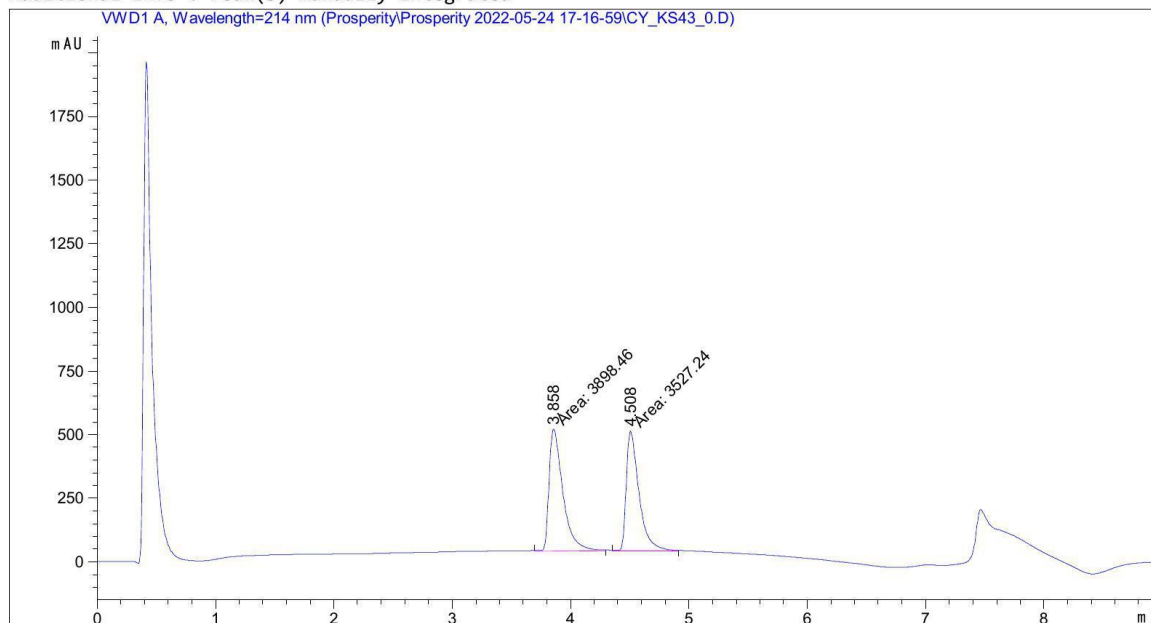

=====  
 Area Percent Report  
 =====

```

Sorted By      : Signal
Multiplier     : 1.0000
Dilution      : 1.0000
Use Multiplier & Dilution Factor with ISTDs
  
```

Signal 1: VWD1 A, Wavelength=214 nm

| Peak # | RetTime [min] | Type | Width [min] | Area [mAU*s] | Height [mAU] | Area %  |
|--------|---------------|------|-------------|--------------|--------------|---------|
| 1      | 3.858         | MM   | 0.1355      | 3898.45776   | 479.44394    | 52.4995 |
| 2      | 4.508         | MM   | 0.1249      | 3527.24170   | 470.64722    | 47.5005 |

Totals :                                7425.69946    950.09116

=====  
 \*\*\* End of Report \*\*\*

```

=====
Acq. Operator   : SYSTEM                      Seq. Line : 24
Acq. Instrument : Timon HPLC                  Location  : 23
Injection Date  : 24/05/2022 22:28:45       Inj       : 1
                                                Inj Volume: 5.000 µl
Method          : C:\Chem32\1\Data\Prosperity\Prosperity 2022-05-24 17-16-59\CY_KS.M (
                : Sequence Method)
Last changed    : 24/05/2022 18:23:51 by SYSTEM
Additional Info  : Peak(s) manually integrated
  
```

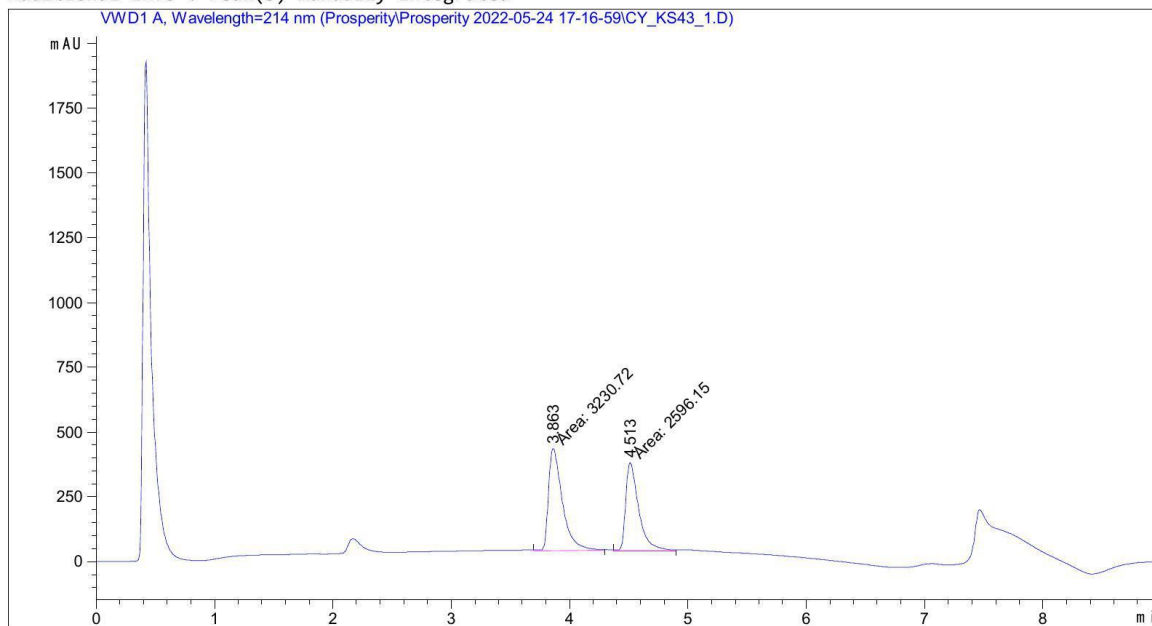

=====  
 Area Percent Report  
 =====

```

Sorted By      : Signal
Multiplier     : 1.0000
Dilution       : 1.0000
Use Multiplier & Dilution Factor with ISTDs
  
```

Signal 1: VWd1 A, Wavelength=214 nm

| Peak # | RetTime [min] | Type | Width [min] | Area [mAU*s] | Height [mAU] | Area %  |
|--------|---------------|------|-------------|--------------|--------------|---------|
| 1      | 3.863         | MM   | 0.1365      | 3230.71631   | 394.33316    | 55.4451 |
| 2      | 4.513         | MM   | 0.1272      | 2596.15454   | 340.24539    | 44.5549 |

Totals :                    5826.87085   734.57855

=====  
 \*\*\* End of Report \*\*\*

```

=====
Acq. Operator   : SYSTEM                      Seq. Line : 25
Acq. Instrument : Timon HPLC                 Location  : 24
Injection Date  : 24/05/2022 22:39:05      Inj       : 1
                                                Inj Volume: 5.000 µl
Method         : C:\Chem32\1\Data\Prosperity\Prosperity 2022-05-24 17-16-59\CY_KS.M (
                Sequence Method)
Last changed    : 24/05/2022 18:23:51 by SYSTEM
Additional Info : Peak(s) manually integrated
  
```

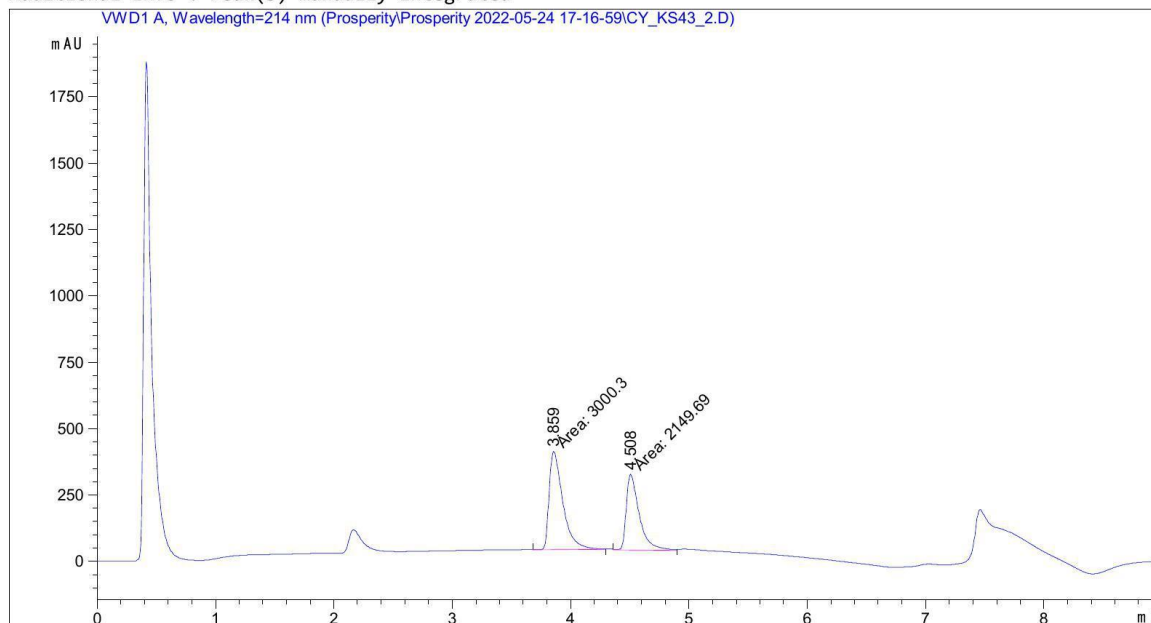

=====  
 Area Percent Report  
 =====

```

Sorted By      : Signal
Multiplier     : 1.0000
Dilution       : 1.0000
Use Multiplier & Dilution Factor with ISTDs
  
```

Signal 1: VWD1 A, Wavelength=214 nm

| Peak # | RetTime [min] | Type | Width [min] | Area [mAU*s] | Height [mAU] | Area %  |
|--------|---------------|------|-------------|--------------|--------------|---------|
| 1      | 3.859         | MM   | 0.1352      | 3000.29810   | 369.88593    | 58.2583 |
| 2      | 4.508         | MM   | 0.1261      | 2149.69165   | 284.21649    | 41.7417 |

Totals :                    5149.98975   654.10242

=====  
 \*\*\* End of Report \*\*\*

```

=====
Acq. Operator   : SYSTEM                      Seq. Line : 26
Acq. Instrument : Timon HPLC                  Location  : 25
Injection Date  : 24/05/2022 22:49:26       Inj       : 1
                                                Inj Volume: 5.000 µl
Method          : C:\Chem32\1\Data\Prosperity\Prosperity 2022-05-24 17-16-59\CY_KS.M (
                : Sequence Method)
Last changed    : 24/05/2022 18:23:51 by SYSTEM
Additional Info  : Peak(s) manually integrated
  
```

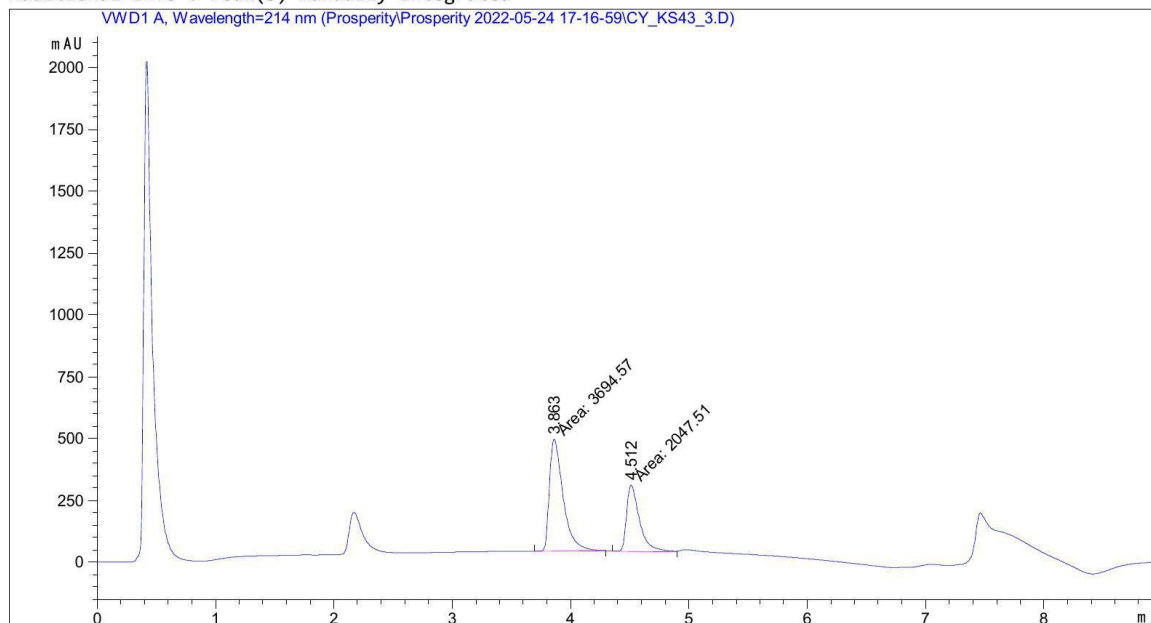

=====  
 Area Percent Report  
 =====

```

Sorted By      : Signal
Multiplier     : 1.0000
Dilution      : 1.0000
Use Multiplier & Dilution Factor with ISTDs
  
```

Signal 1: VWD1 A, Wavelength=214 nm

| Peak # | RetTime [min] | Type | Width [min] | Area [mAU*s] | Height [mAU] | Area %  |
|--------|---------------|------|-------------|--------------|--------------|---------|
| 1      | 3.863         | MM   | 0.1357      | 3694.56592   | 453.82535    | 64.3419 |
| 2      | 4.512         | MM   | 0.1270      | 2047.51440   | 268.60461    | 35.6581 |

Totals :                    5742.08032   722.42996

=====  
 \*\*\* End of Report \*\*\*

```

=====
Acq. Operator   : SYSTEM                      Seq. Line : 28
Acq. Instrument : Timon HPLC                  Location  : 26
Injection Date  : 24/05/2022 23:10:12        Inj       : 1
                                           Inj Volume: 5.000 µl
Method          : C:\Chem32\1\Data\Prosperity\Prosperity 2022-05-24 17-16-59\CY_KS.M (
                : Sequence Method)
Last changed    : 24/05/2022 18:23:51 by SYSTEM
Additional Info  : Peak(s) manually integrated
  
```

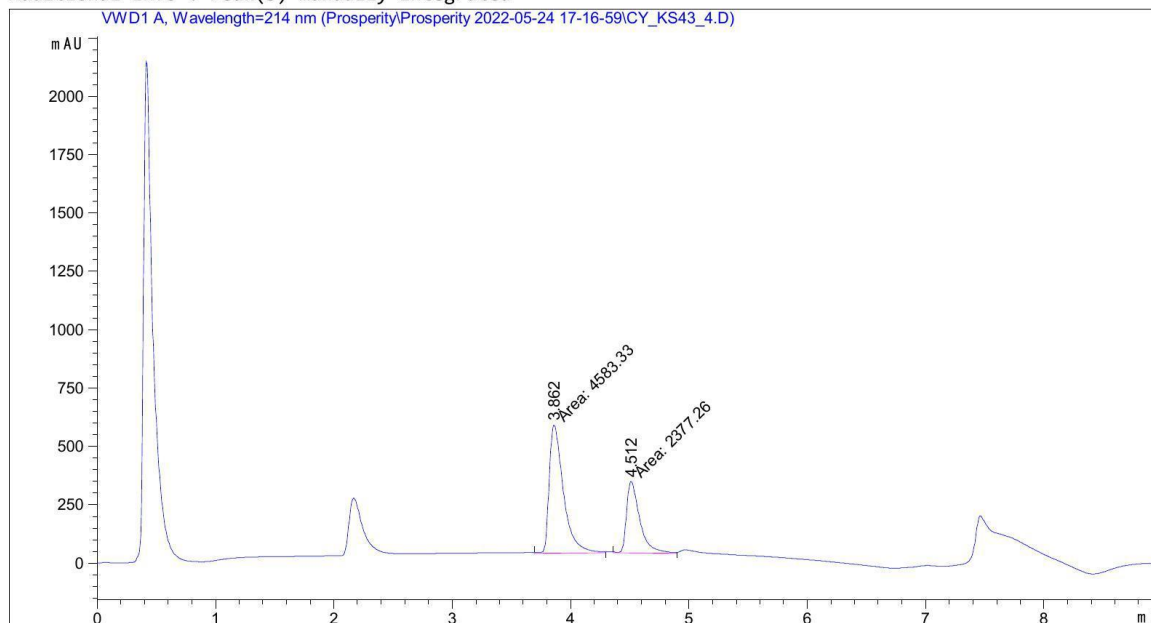

=====  
 Area Percent Report  
 =====

```

Sorted By      : Signal
Multiplier     : 1.0000
Dilution      : 1.0000
Use Multiplier & Dilution Factor with ISTDs
  
```

Signal 1: VWD1 A, Wavelength=214 nm

| Peak # | RetTime [min] | Type | Width [min] | Area [mAU*s] | Height [mAU] | Area %  |
|--------|---------------|------|-------------|--------------|--------------|---------|
| 1      | 3.862         | MM   | 0.1392      | 4583.33008   | 548.84412    | 65.8468 |
| 2      | 4.512         | MM   | 0.1291      | 2377.26245   | 306.98596    | 34.1532 |

Totals :                    6960.59253   855.83008

=====  
 \*\*\* End of Report \*\*\*

Data File C:\Chem32\1\Data\Prosperity\Prosperity 2022-05-24 17-16-59\CY\_KS43\_5.D  
 Sample Name: CY\_KS43\_5

```

=====
Acq. Operator   : SYSTEM                      Seq. Line :   29
Acq. Instrument : Timon HPLC                  Location  :   27
Injection Date  : 24/05/2022 23:20:32         Inj       :    1
                                           Inj Volume: 5.000 µl
Method         : C:\Chem32\1\Data\Prosperity\Prosperity 2022-05-24 17-16-59\CY_KS.M (
                Sequence Method)
Last changed   : 24/05/2022 18:23:51 by SYSTEM
Additional Info : Peak(s) manually integrated
  
```

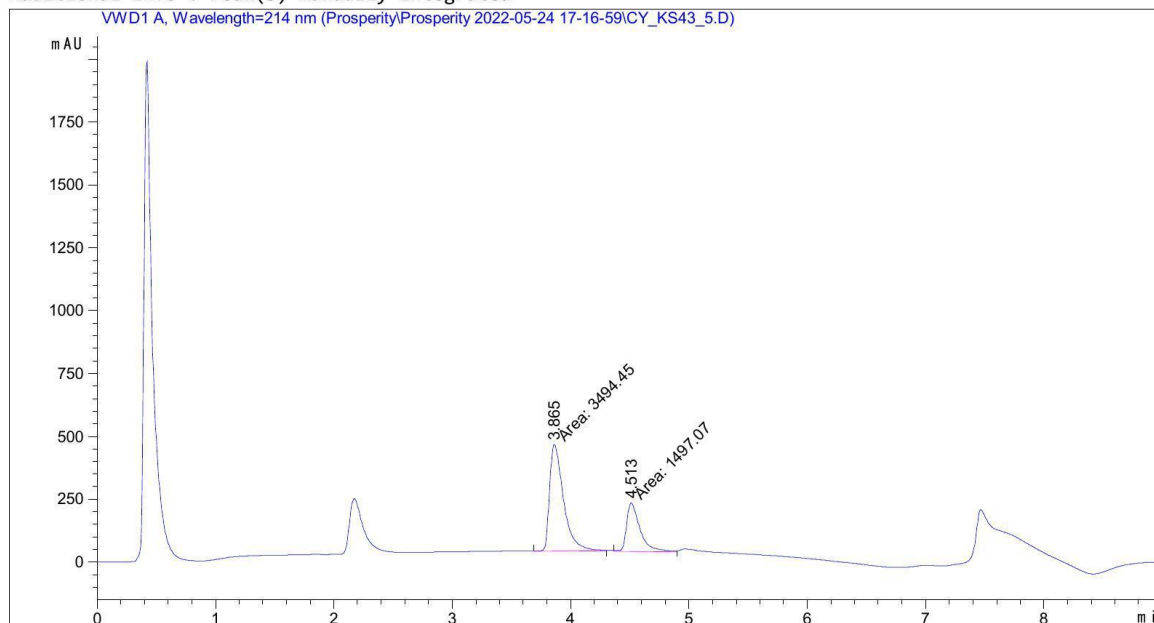

=====  
 Area Percent Report  
 =====

```

Sorted By      : Signal
Multiplier     : 1.0000
Dilution       : 1.0000
Use Multiplier & Dilution Factor with ISTDs
  
```

Signal 1: VWD1 A, Wavelength=214 nm

| Peak # | RetTime [min] | Type | Width [min] | Area [mAU*s] | Height [mAU] | Area %  |
|--------|---------------|------|-------------|--------------|--------------|---------|
| 1      | 3.865         | MM   | 0.1374      | 3494.45239   | 423.98785    | 70.0078 |
| 2      | 4.513         | MM   | 0.1301      | 1497.06506   | 191.72386    | 29.9922 |

Totals :                    4991.51746   615.71172

=====  
 \*\*\* End of Report \*\*\*

```

=====
Acq. Operator   : SYSTEM                      Seq. Line :   30
Acq. Instrument : Timon HPLC                  Location  :   28
Injection Date  : 24/05/2022 23:30:53        Inj       :    1
                                           Inj Volume: 5.000 µl

Method         : C:\Chem32\1\Data\Prosperity\Prosperity 2022-05-24 17-16-59\CY_KS.M (
                Sequence Method)
Last changed   : 24/05/2022 18:23:51 by SYSTEM
Additional Info : Peak(s) manually integrated
  
```

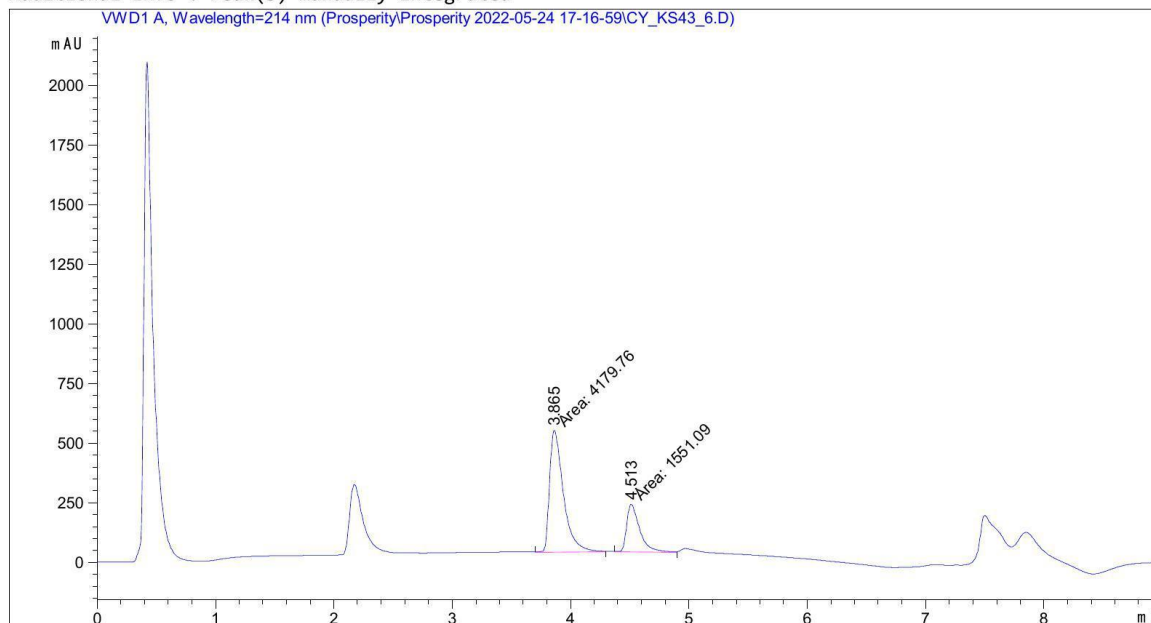

=====  
 Area Percent Report  
 =====

```

Sorted By      :      Signal
Multiplier     :      1.0000
Dilution       :      1.0000
Use Multiplier & Dilution Factor with ISTDs
  
```

Signal 1: VWD1 A, Wavelength=214 nm

| Peak # | RetTime [min] | Type | Width [min] | Area [mAU*s] | Height [mAU] | Area %  |
|--------|---------------|------|-------------|--------------|--------------|---------|
| 1      | 3.865         | MM   | 0.1363      | 4179.75635   | 511.09512    | 72.9344 |
| 2      | 4.513         | MM   | 0.1287      | 1551.08862   | 200.90512    | 27.0656 |

Totals :                    5730.84497   712.00024

=====  
 \*\*\* End of Report \*\*\*



```

=====
Acq. Operator   : SYSTEM                      Seq. Line :   31
Acq. Instrument : Timon HPLC                  Location  :   29
Injection Date  : 24/05/2022 23:41:14        Inj       :    1
                                           Inj Volume: 5.000 µl
Method          : C:\Chem32\1\Data\Prosperity\Prosperity 2022-05-24 17-16-59\CY_KS.M (
                : Sequence Method)
Last changed    : 24/05/2022 18:23:51 by SYSTEM
Additional Info  : Peak(s) manually integrated
  
```

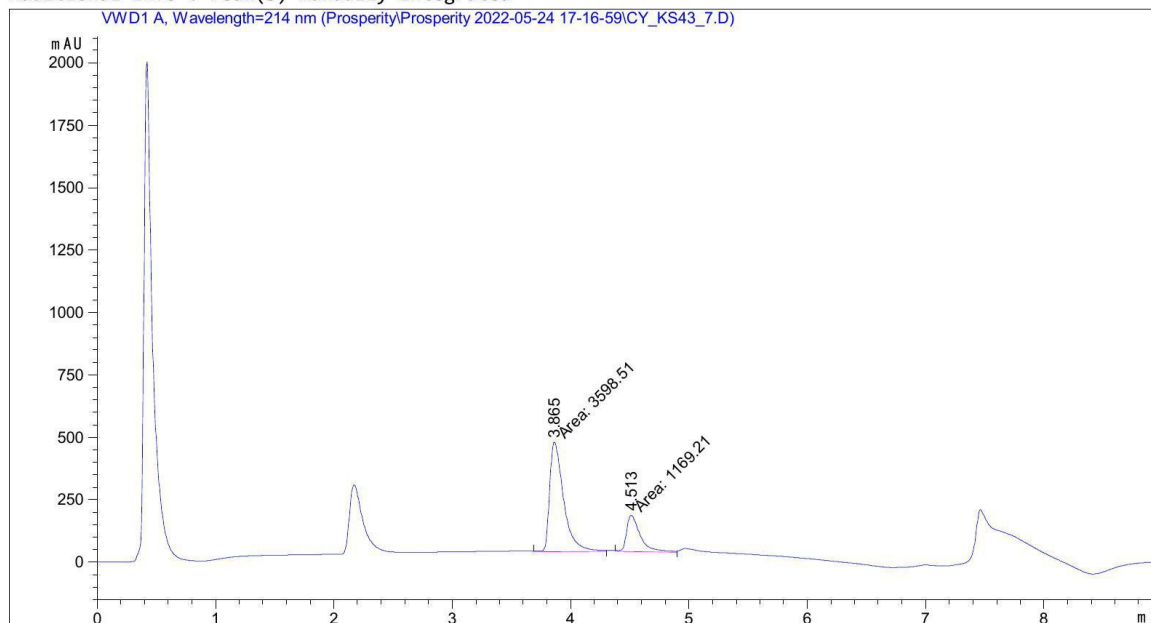

=====  
 Area Percent Report  
 =====

```

Sorted By      : Signal
Multiplier     : 1.0000
Dilution       : 1.0000
Use Multiplier & Dilution Factor with ISTDs
  
```

Signal 1: VWD1 A, Wavelength=214 nm

| Peak # | RetTime [min] | Type | Width [min] | Area [mAU*s] | Height [mAU] | Area %  |
|--------|---------------|------|-------------|--------------|--------------|---------|
| 1      | 3.865         | MM   | 0.1369      | 3598.50928   | 438.21997    | 75.4766 |
| 2      | 4.513         | MM   | 0.1337      | 1169.20898   | 145.75748    | 24.5234 |

Totals :                    4767.71826   583.97745

=====  
 \*\*\* End of Report \*\*\*

```

=====
Acq. Operator   : SYSTEM                      Seq. Line :   33
Acq. Instrument : Timon HPLC                  Location  :   30
Injection Date  : 25/05/2022 00:02:03        Inj       :    1
                                           Inj Volume: 5.000 µl
Method         : C:\Chem32\1\Data\Prosperity\Prosperity 2022-05-24 17-16-59\CY_KS.M (
                Sequence Method)
Last changed    : 24/05/2022 18:23:51 by SYSTEM
Additional Info : Peak(s) manually integrated
  
```

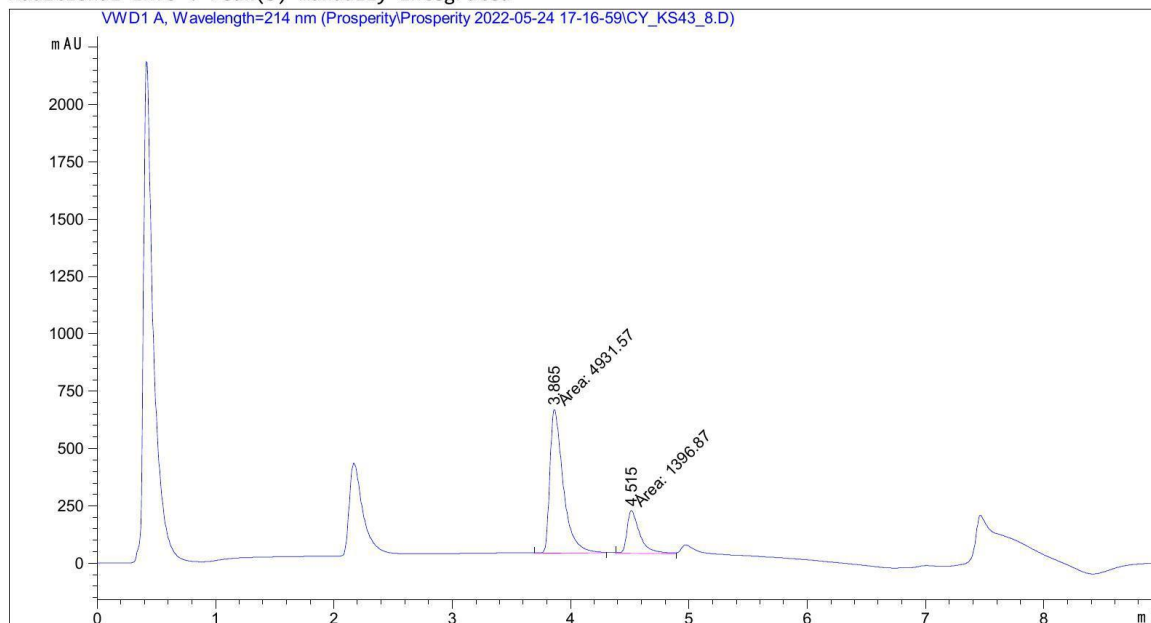

=====  
 Area Percent Report  
 =====

```

Sorted By      :      Signal
Multiplier     :      1.0000
Dilution      :      1.0000
Use Multiplier & Dilution Factor with ISTDs
  
```

Signal 1: VWD1 A, Wavelength=214 nm

| Peak # | RetTime [min] | Type | Width [min] | Area [mAU*s] | Height [mAU] | Area %  |
|--------|---------------|------|-------------|--------------|--------------|---------|
| 1      | 3.865         | MM   | 0.1312      | 4931.56689   | 626.67621    | 77.9272 |
| 2      | 4.515         | MM   | 0.1246      | 1396.86523   | 186.82523    | 22.0728 |

Totals :                    6328.43213   813.50143

=====  
 \*\*\* End of Report \*\*\*

```

=====
Acq. Operator   : SYSTEM                      Seq. Line :   34
Acq. Instrument : Timon HPLC                  Location  :   31
Injection Date  : 25/05/2022 00:12:25        Inj       :    1
                                           Inj Volume: 5.000 µl
Method          : C:\Chem32\1\Data\Prosperity\Prosperity 2022-05-24 17-16-59\CY_KS.M (
                : Sequence Method)
Last changed    : 24/05/2022 18:23:51 by SYSTEM
Additional Info  : Peak(s) manually integrated
  
```

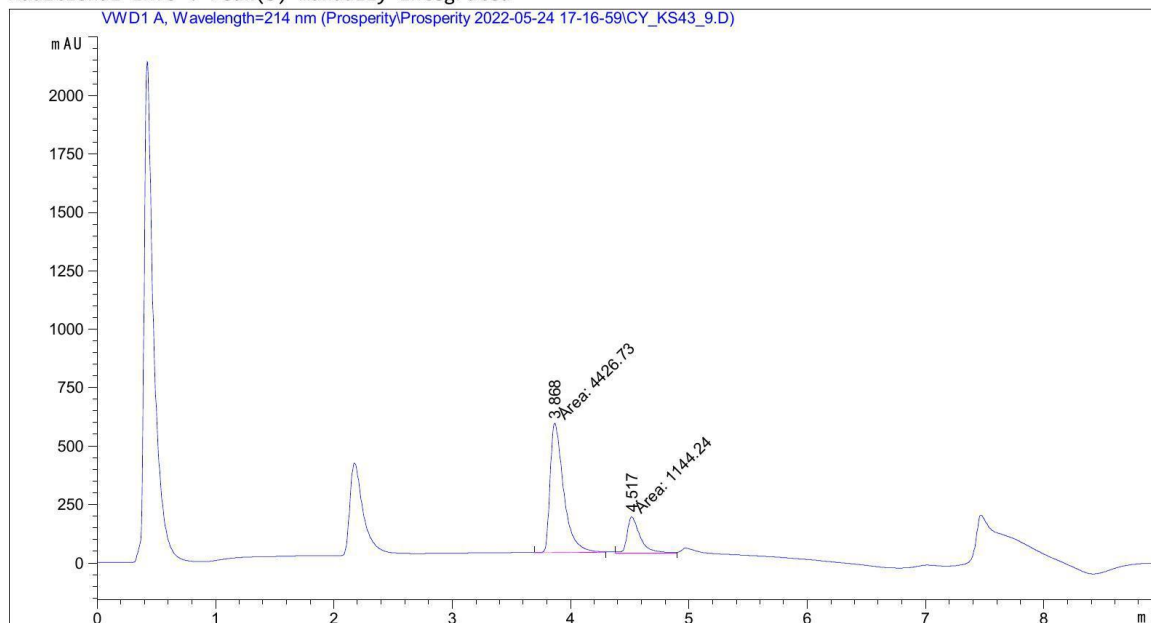

=====  
 Area Percent Report  
 =====

```

Sorted By      : Signal
Multiplier     : 1.0000
Dilution      : 1.0000
Use Multiplier & Dilution Factor with ISTDs
  
```

Signal 1: VWD1 A, Wavelength=214 nm

| Peak # | RetTime [min] | Type | Width [min] | Area [mAU*s] | Height [mAU] | Area %  |
|--------|---------------|------|-------------|--------------|--------------|---------|
| 1      | 3.868         | MM   | 0.1333      | 4426.72705   | 553.57880    | 79.4607 |
| 2      | 4.517         | MM   | 0.1245      | 1144.23547   | 153.13011    | 20.5393 |

Totals :                    5570.96252   706.70891

=====  
 \*\*\* End of Report \*\*\*

```

=====
Acq. Operator   : SYSTEM                      Seq. Line :   35
Acq. Instrument : Timon HPLC                  Location  :   32
Injection Date  : 25/05/2022 00:22:47         Inj       :    1
                                           Inj Volume: 5.000 µl
Method          : C:\Chem32\1\Data\Prosperity\Prosperity 2022-05-24 17-16-59\CY_KS.M (
                  Sequence Method)
Last changed    : 24/05/2022 18:23:51 by SYSTEM
Additional Info  : Peak(s) manually integrated
  
```

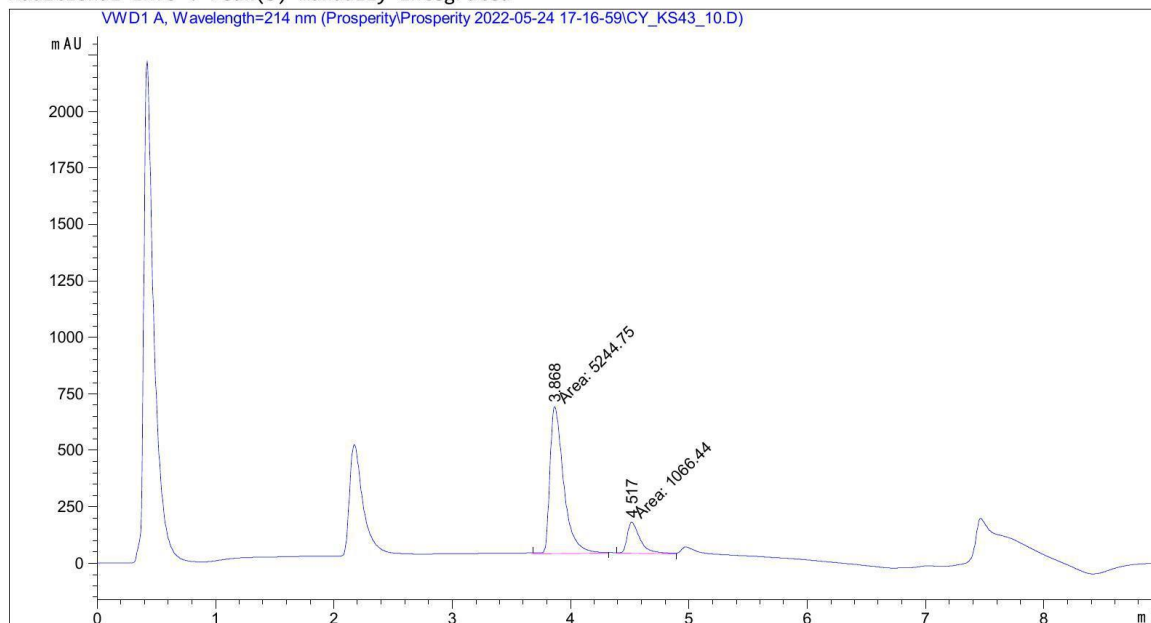

```

=====
                          Area Percent Report
=====
  
```

```

Sorted By      :      Signal
Multiplier     :      1.0000
Dilution       :      1.0000
Use Multiplier & Dilution Factor with ISTDs
  
```

Signal 1: VWD1 A, Wavelength=214 nm

| Peak # | RetTime [min] | Type | Width [min] | Area [mAU*s] | Height [mAU] | Area %  |
|--------|---------------|------|-------------|--------------|--------------|---------|
| 1      | 3.868         | MM   | 0.1347      | 5244.74707   | 649.16217    | 83.1024 |
| 2      | 4.517         | MM   | 0.1286      | 1066.44104   | 138.22710    | 16.8976 |

```
Totals :                      6311.18811  787.38927
```

```

=====
*** End of Report ***
  
```

```

=====
Acq. Operator   : SYSTEM                      Seq. Line :   36
Acq. Instrument : Timon HPLC                  Location  :   33
Injection Date  : 25/05/2022 00:33:07       Inj       :    1
                                           Inj Volume: 5.000 µl
Method         : C:\Chem32\1\Data\Prosperity\Prosperity 2022-05-24 17-16-59\CY_KS.M (
                Sequence Method)
Last changed   : 24/05/2022 18:23:51 by SYSTEM
Additional Info : Peak(s) manually integrated
  
```

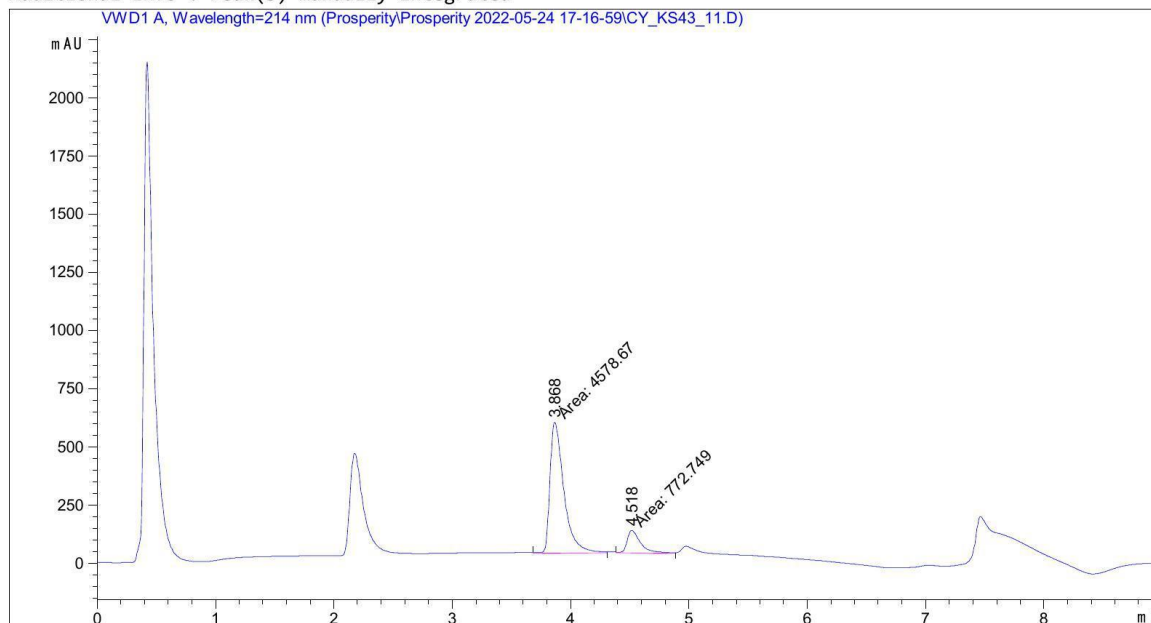

=====  
 Area Percent Report  
 =====

```

Sorted By      :      Signal
Multiplier     :      1.0000
Dilution       :      1.0000
Use Multiplier & Dilution Factor with ISTDs
  
```

Signal 1: VWD1 A, Wavelength=214 nm

| Peak # | RetTime [min] | Type | Width [min] | Area [mAU*s] | Height [mAU] | Area %  |
|--------|---------------|------|-------------|--------------|--------------|---------|
| 1      | 3.868         | MM   | 0.1358      | 4578.66846   | 561.76074    | 85.5599 |
| 2      | 4.518         | MM   | 0.1321      | 772.74945    | 97.48956     | 14.4401 |

Totals :                    5351.41791   659.25031

=====  
 \*\*\* End of Report \*\*\*
