# Supplementary material for: Computer vision for non-contact monitoring of catalyst degradation and product formation kinetics
Source: Royal Society of Chemistry journal article supplement (doi:10.1039/d2sc05702f), 2023-01-01
Supplement: d2sc05702f2.pdf [file d2sc05702f2.pdf]

## LC-MS Traces

### Scheme 8 – Borylation Reaction with Pre-heated catalyst solution

| Compound                                    | Retention time (RT) |
|---------------------------------------------|---------------------|
| Bromobenzene                                | 8.01 min            |
| 1,3,5-trimethoxybenzene (Internal standard) | 7.19 min            |
| Phenylboronic acid pinacol ester            | 8.76 min            |

The product (phenylboronic acid pinacol ester) is unstable in the aqueous LC-MS sample solution, will degrade to phenylboronic acid derivatives (RT = 4.99 min).

Data File C:\Chem32\1\Data\Oct19\Seq\_daily 2019-10-30 14-13-44\CY\_KS14\_0.D  
Sample Name: CY\_KS14\_0

```
=====
Acq. Operator   : SYSTEM                      Seq. Line :    1
Acq. Instrument : 6130B LCMS                 Location  :    3
Injection Date  : 30-Oct-19 2:16:08 PM      Inj       :    1
                                           Inj Volume: 10.000 µl
Method          : C:\Chem32\1\Data\Oct19\Seq_daily 2019-10-30 14-13-44\PORO_AMMACE_214_70.M (
                  Sequence Method)
Last changed    : 30-Oct-19 2:13:44 PM by SYSTEM
Method Info     : method for Poroshell 120 4.6 x75 x2.7µm
=====
```

Additional Info : Peak(s) manually integrated

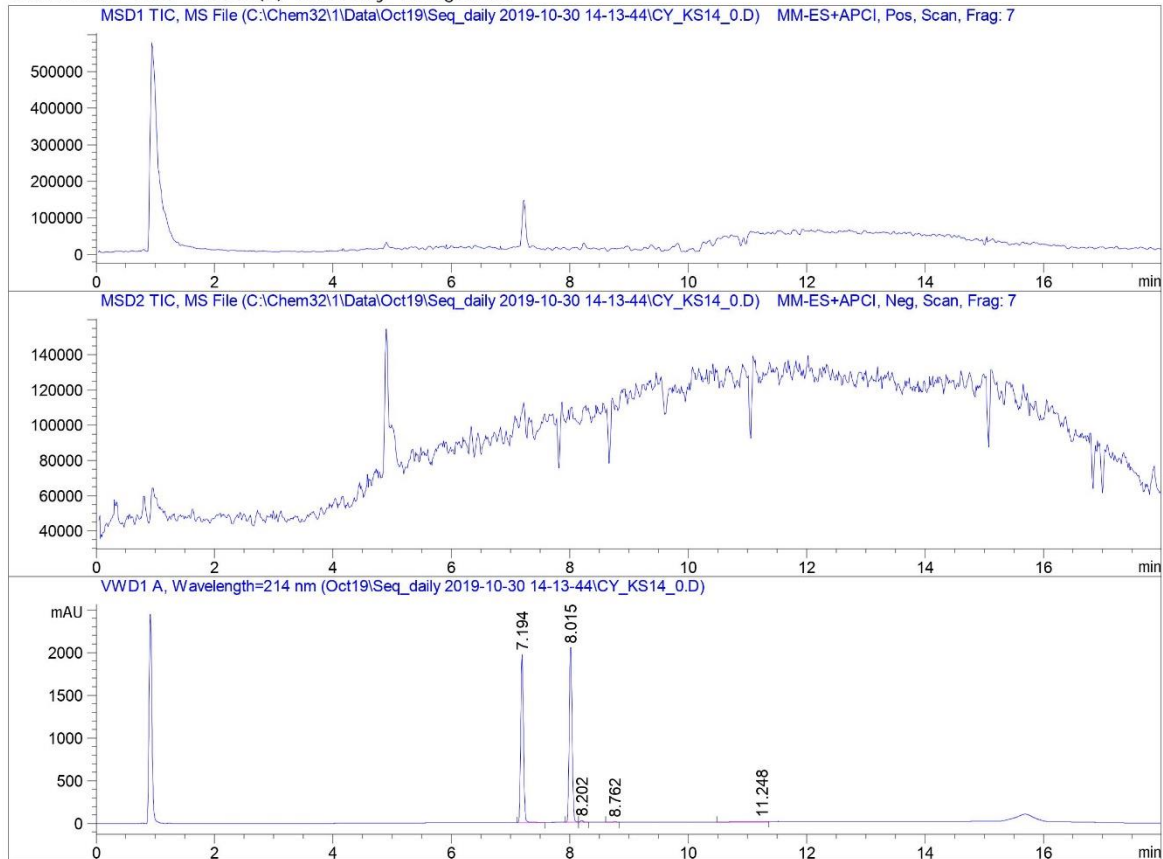

=====  
Area Percent Report  
=====

```
Sorted By      : Signal
Multiplier     : 1.0000
Dilution       : 1.0000
Use Multiplier & Dilution Factor with ISTDs
```

Signal 1: MSD1 TIC, MS File

Signal 2: MSD2 TIC, MS File

Signal 3: VWD1 A, Wavelength=214 nm

| Peak # | RetTime [min] | Type | Width [min] | Area [mAU*s] | Height [mAU] | Area %  |
|--------|---------------|------|-------------|--------------|--------------|---------|
| 1      | 7.194         | BB   | 0.0501      | 6223.38770   | 1963.34949   | 46.8536 |
| 2      | 8.015         | BV   | 0.0531      | 6781.76807   | 2054.18188   | 51.0574 |
| 3      | 8.202         | VB   | 0.0520      | 65.65144     | 19.66779     | 0.4943  |
| 4      | 8.762         | VB   | 0.0487      | 17.86457     | 5.63215      | 0.1345  |
| 5      | 11.248        | BV   | 0.4156      | 193.95953    | 5.83337      | 1.4602  |

Totals : 1.32826e4 4048.66468

=====  
\*\*\* End of Report \*\*\*

Data File C:\Chem32\1\Data\Oct19\Seq\_daily 2019-10-30 14-13-44\CY\_KS14\_1.D  
Sample Name: CY\_KS14\_1

```
=====
Acq. Operator   : SYSTEM                      Seq. Line :    2
Acq. Instrument : 6130B LCMS                  Location  :    4
Injection Date  : 30-Oct-19 2:35:44 PM       Inj       :    1
                                           Inj Volume: 10.000 µl
Method          : C:\Chem32\1\Data\Oct19\Seq_daily 2019-10-30 14-13-44\PORO_AMMACE_214_70.M (
                  Sequence Method)
Last changed    : 30-Oct-19 2:13:44 PM by SYSTEM
Method Info     : method for Poroshell 120 4.6 x75 x2.7um
=====
```

Additional Info : Peak(s) manually integrated

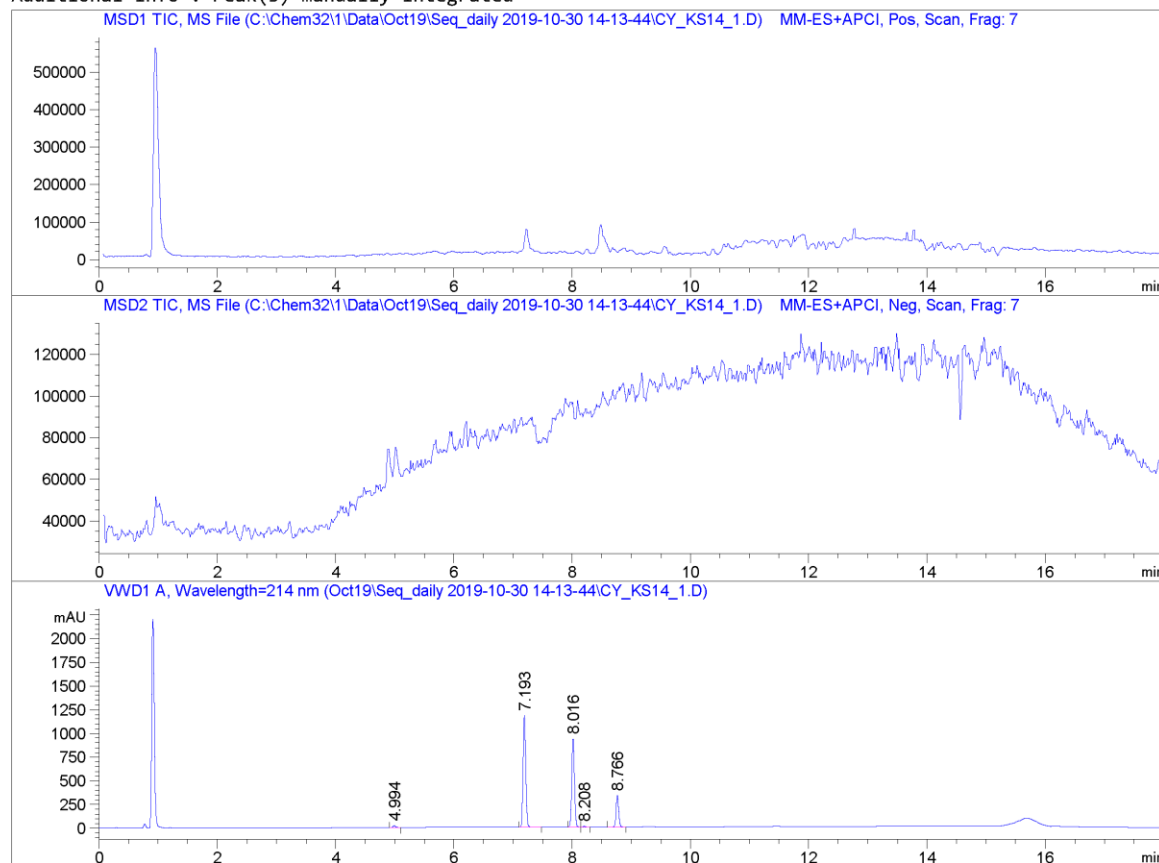

```
=====
                          Area Percent Report
=====
```

```
Sorted By      :      Signal
Multiplier     :      1.0000
Dilution       :      1.0000
Use Multiplier & Dilution Factor with ISTDs
```

Data File C:\Chem32\1\Data\Oct19\Seq\_daily 2019-10-30 14-13-44\CY\_KS14\_1.D  
Sample Name: CY\_KS14\_1

Signal 1: MSD1 TIC, MS File

Signal 2: MSD2 TIC, MS File

Signal 3: VWD1 A, Wavelength=214 nm

| Peak # | RetTime [min] | Type | Width [min] | Area [mAU*s] | Height [mAU] | Area %  |
|--------|---------------|------|-------------|--------------|--------------|---------|
| 1      | 4.994         | BV   | 0.0516      | 80.66749     | 24.44972     | 1.0405  |
| 2      | 7.193         | BB   | 0.0491      | 3653.05273   | 1182.64063   | 47.1208 |
| 3      | 8.016         | BV   | 0.0490      | 2987.28027   | 932.23676    | 38.5330 |
| 4      | 8.208         | VB   | 0.0493      | 27.77909     | 8.60116      | 0.3583  |
| 5      | 8.766         | BV   | 0.0485      | 1003.74170   | 331.11255    | 12.9473 |

Totals : 7752.52128 2479.04081

=====  
\*\*\* End of Report \*\*\*

```
=====
Acq. Operator   : SYSTEM                      Seq. Line :    3
Acq. Instrument : 6130B LCMS                 Location  :    5
Injection Date  : 30-Oct-19 2:55:22 PM      Inj       :    1
                                           Inj Volume: 10.000 µl
Method          : C:\Chem32\1\Data\Oct19\Seq_daily 2019-10-30 14-13-44\PORO_AMMACE_214_70.M (
                : Sequence Method)
Last changed    : 30-Oct-19 2:13:44 PM by SYSTEM
Method Info     : method for Poroshell 120 4.6 x75 x2.7um
=====
```

Additional Info : Peak(s) manually integrated

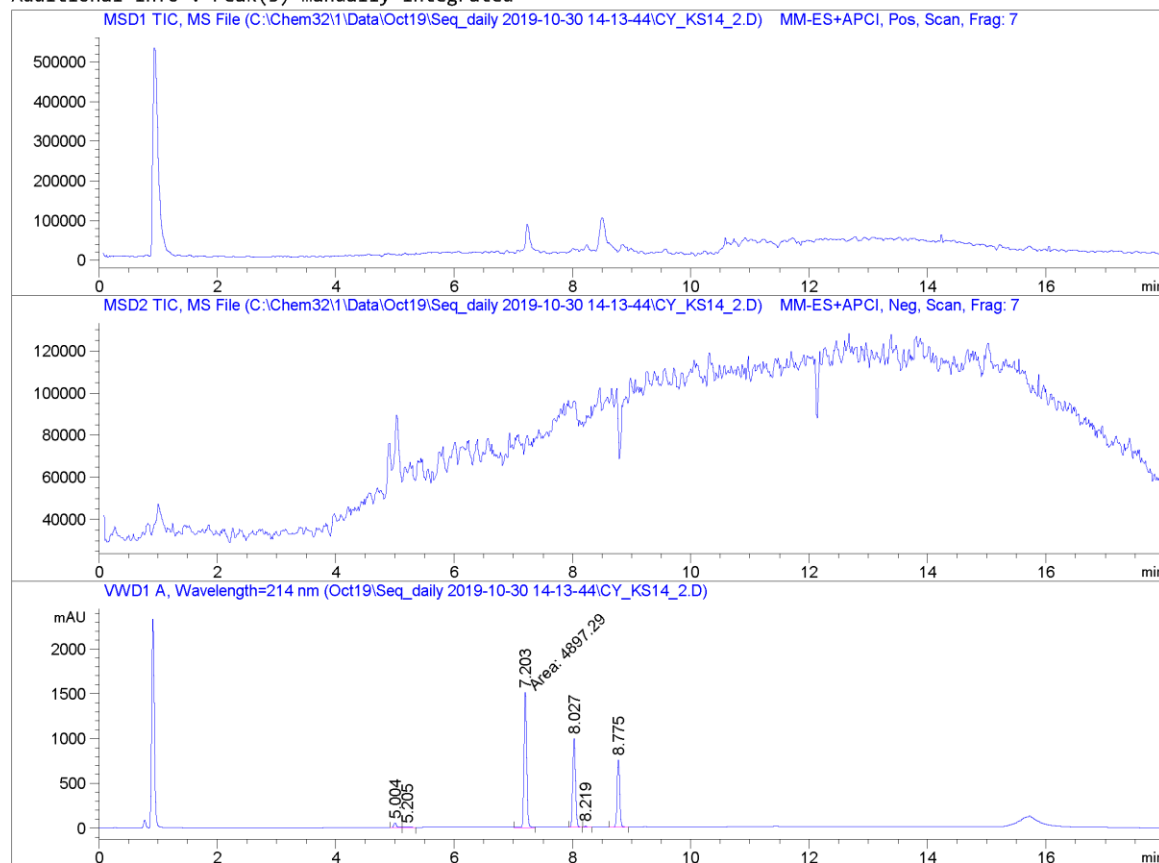

=====  
Area Percent Report  
=====

```
Sorted By      : Signal
Multiplier     : 1.0000
Dilution       : 1.0000
Use Multiplier & Dilution Factor with ISTDs
```

Data File C:\Chem32\1\Data\Oct19\Seq\_daily 2019-10-30 14-13-44\CY\_KS14\_2.D  
Sample Name: CY\_KS14\_2

Signal 1: MSD1 TIC, MS File

Signal 2: MSD2 TIC, MS File

Signal 3: VWD1 A, Wavelength=214 nm

| Peak # | RetTime [min] | Type | Width [min] | Area [mAU*s] | Height [mAU] | Area %  |
|--------|---------------|------|-------------|--------------|--------------|---------|
| 1      | 5.004         | BV   | 0.0525      | 177.51767    | 52.54781     | 1.6828  |
| 2      | 5.205         | VV   | 0.1368      | 27.16753     | 2.75659      | 0.2575  |
| 3      | 7.203         | MM   | 0.0538      | 4897.29492   | 1517.53845   | 46.4239 |
| 4      | 8.027         | BV   | 0.0505      | 3152.93237   | 984.83838    | 29.8882 |
| 5      | 8.219         | VV   | 0.0505      | 32.03975     | 9.60901      | 0.3037  |
| 6      | 8.775         | VV   | 0.0483      | 2262.11768   | 749.22552    | 21.4438 |

Totals : 1.05491e4 3316.51577

=====  
\*\*\* End of Report \*\*\*

Data File C:\Chem32\1\Data\Oct19\Seq\_daily 2019-10-30 14-13-44\CY\_KS14\_3.D  
Sample Name: CY\_KS14\_3

```
=====
Acq. Operator   : SYSTEM                      Seq. Line :    4
Acq. Instrument : 6130B LCMS                 Location  :    6
Injection Date  : 30-Oct-19 3:14:59 PM      Inj       :    1
                                           Inj Volume: 10.000 µl
Method         : C:\Chem32\1\Data\Oct19\Seq_daily 2019-10-30 14-13-44\PORO_AMMACE_214_70.M (
                Sequence Method)
Last changed   : 30-Oct-19 2:13:44 PM by SYSTEM
Method Info    : method for Poroshell 120 4.6 x75 x2.7um
=====
```

Additional Info : Peak(s) manually integrated

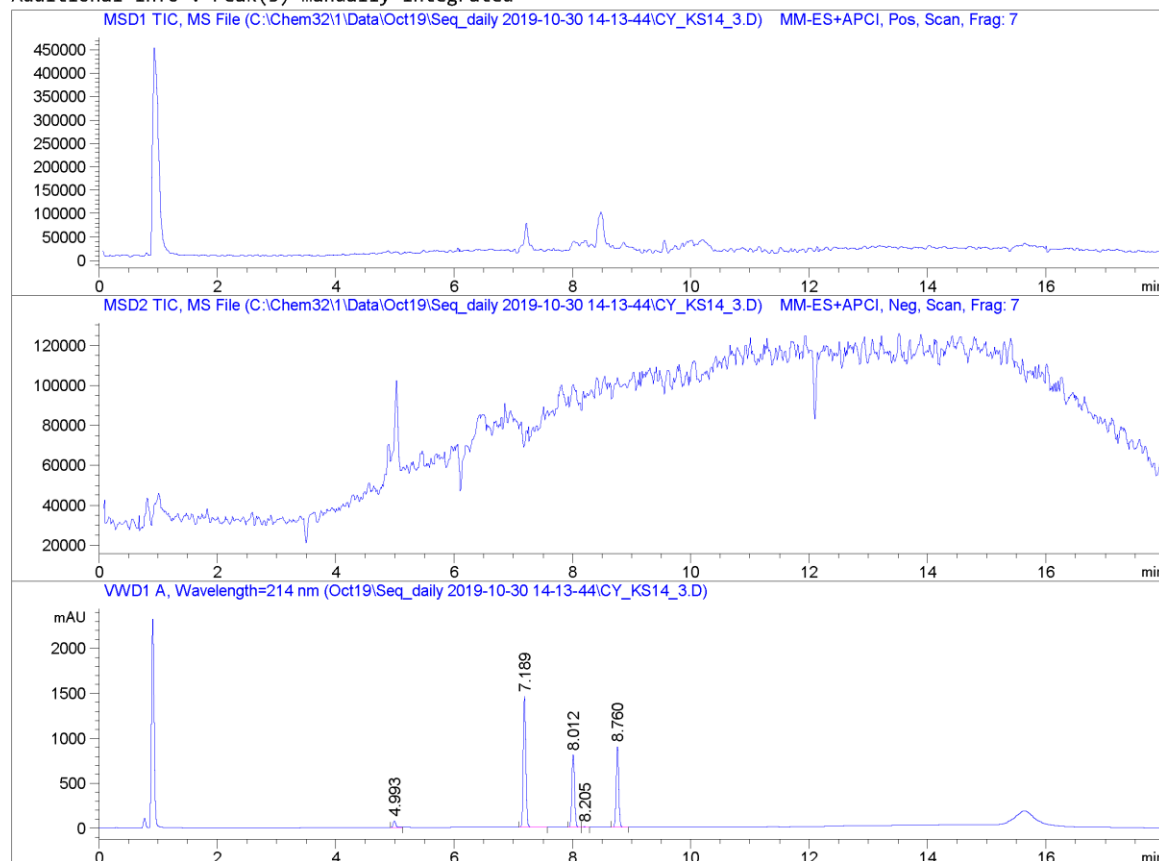

```
=====
                          Area Percent Report
=====
```

```
Sorted By      :      Signal
Multiplier     :      1.0000
Dilution      :      1.0000
Use Multiplier & Dilution Factor with ISTDs
```



Data File C:\Chem32\1\Data\Oct19\Seq\_daily 2019-10-30 14-13-44\CY\_KS14\_3.D  
Sample Name: CY\_KS14\_3

Signal 1: MSD1 TIC, MS File

Signal 2: MSD2 TIC, MS File

Signal 3: VWD1 A, Wavelength=214 nm

| Peak # | RetTime [min] | Type | Width [min] | Area [mAU*s] | Height [mAU] | Area %  |
|--------|---------------|------|-------------|--------------|--------------|---------|
| 1      | 4.993         | BB   | 0.0483      | 227.84889    | 72.53455     | 2.2765  |
| 2      | 7.189         | BB   | 0.0491      | 4497.90479   | 1458.06519   | 44.9406 |
| 3      | 8.012         | BV   | 0.0503      | 2568.38086   | 805.21124    | 25.6618 |
| 4      | 8.205         | VV   | 0.0492      | 23.02415     | 7.15427      | 0.2300  |
| 5      | 8.760         | BB   | 0.0467      | 2691.40649   | 896.15845    | 26.8910 |

Totals : 1.00086e4 3239.12370

=====  
\*\*\* End of Report \*\*\*

Data File C:\Chem32\1\Data\Oct19\Seq\_daily 2019-10-30 14-13-44\CY\_KS14\_4.D  
Sample Name: CY\_KS14\_4

```
=====
Acq. Operator   : SYSTEM                      Seq. Line :    7
Acq. Instrument : 6130B LCMS                 Location  :    7
Injection Date  : 30-Oct-19 4:13:49 PM      Inj       :    1
                                           Inj Volume: 10.000 µl
Method          : C:\Chem32\1\Data\Oct19\Seq_daily 2019-10-30 14-13-44\PORO_AMMACE_214_70.M (
                : Sequence Method)
Last changed    : 30-Oct-19 2:13:44 PM by SYSTEM
Method Info     : method for Poroshell 120 4.6 x75 x2.7um
=====
```

Additional Info : Peak(s) manually integrated

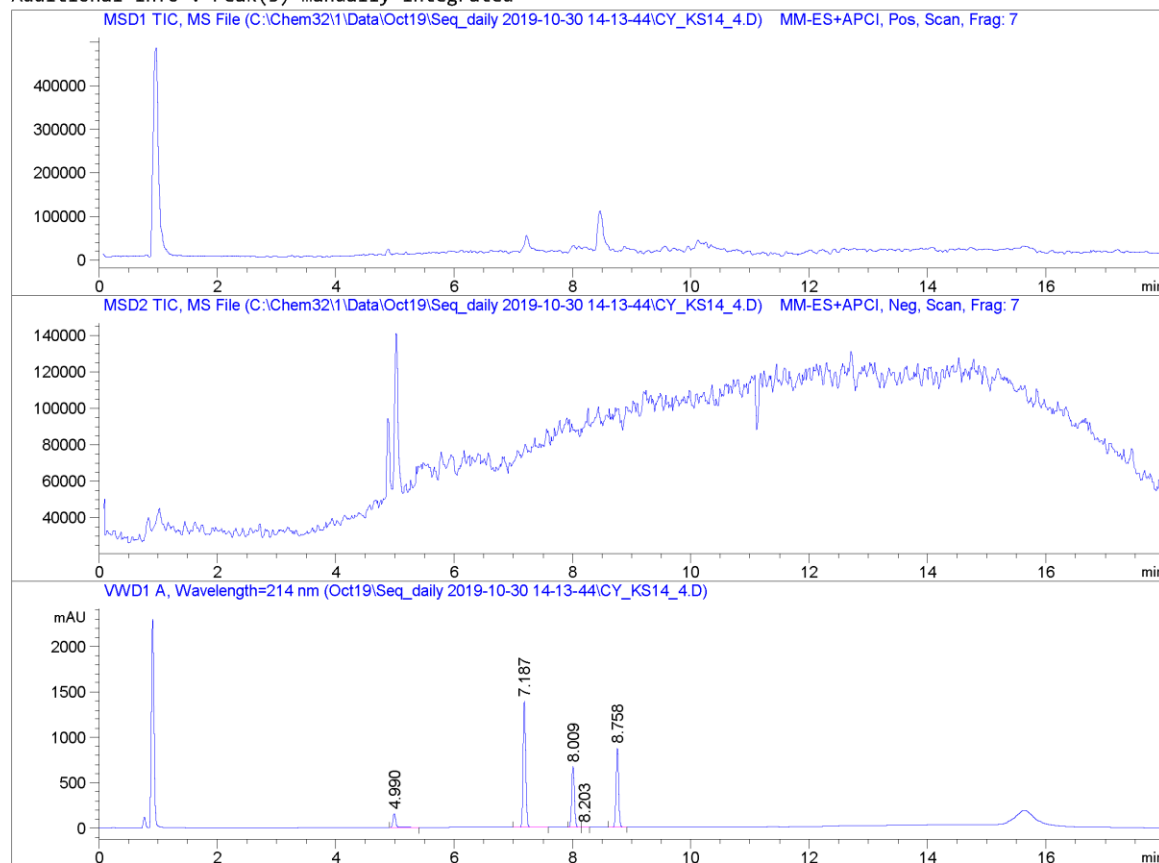

=====  
Area Percent Report  
=====

```
Sorted By      : Signal
Multiplier     : 1.0000
Dilution       : 1.0000
Use Multiplier & Dilution Factor with ISTDs
```

Data File C:\Chem32\1\Data\Oct19\Seq\_daily 2019-10-30 14-13-44\CY\_KS14\_4.D  
Sample Name: CY\_KS14\_4

Signal 1: MSD1 TIC, MS File

Signal 2: MSD2 TIC, MS File

Signal 3: VWD1 A, Wavelength=214 nm

| Peak # | RetTime [min] | Type | Width [min] | Area [mAU*s] | Height [mAU] | Area %  |
|--------|---------------|------|-------------|--------------|--------------|---------|
| 1      | 4.990         | BV   | 0.0539      | 545.89813    | 156.04333    | 5.6577  |
| 2      | 7.187         | VB   | 0.0478      | 4312.30762   | 1390.62122   | 44.6927 |
| 3      | 8.009         | BV   | 0.0505      | 2135.04932   | 666.66504    | 22.1276 |
| 4      | 8.203         | VB   | 0.0483      | 16.28915     | 5.17811      | 0.1688  |
| 5      | 8.758         | BV   | 0.0470      | 2639.24146   | 871.17480    | 27.3531 |

Totals : 9648.78567 3089.68250

=====  
\*\*\* End of Report \*\*\*

```
=====
Acq. Operator   : SYSTEM                      Seq. Line :    8
Acq. Instrument : 6130B LCMS                 Location  :    8
Injection Date  : 30-Oct-19 4:33:30 PM      Inj       :    1
                                           Inj Volume: 10.000 µl
Method          : C:\Chem32\1\Data\Oct19\Seq_daily 2019-10-30 14-13-44\PORO_AMMACE_214_70.M (
                : Sequence Method)
Last changed    : 30-Oct-19 2:13:44 PM by SYSTEM
Method Info     : method for Poroshell 120 4.6 x75 x2.7µm
=====
```

Additional Info : Peak(s) manually integrated

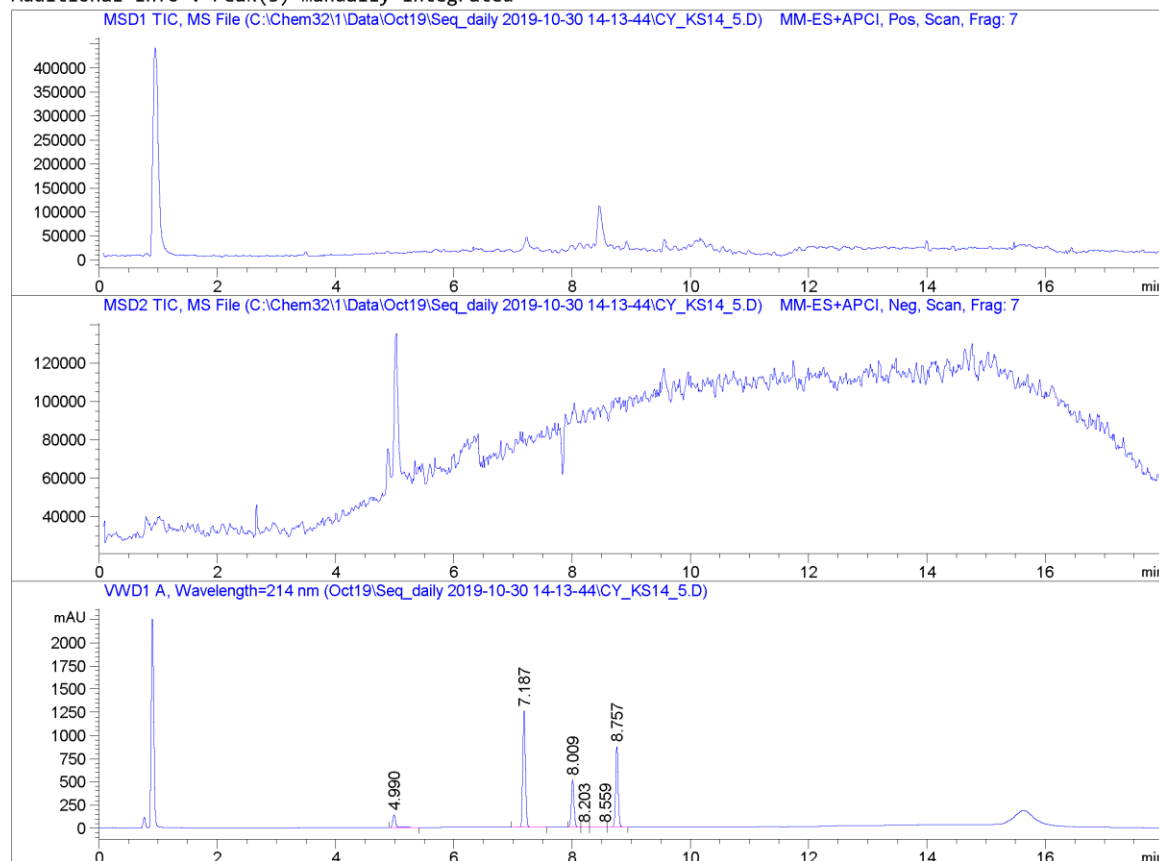

=====  
Area Percent Report  
=====

```
Sorted By      : Signal
Multiplier     : 1.0000
Dilution       : 1.0000
Use Multiplier & Dilution Factor with ISTDs
```

Data File C:\Chem32\1\Data\Oct19\Seq\_daily 2019-10-30 14-13-44\CY\_KS14\_5.D  
Sample Name: CY\_KS14\_5

Signal 1: MSD1 TIC, MS File

Signal 2: MSD2 TIC, MS File

Signal 3: VWD1 A, Wavelength=214 nm

| Peak # | RetTime [min] | Type | Width [min] | Area [mAU*s] | Height [mAU] | Area %  |
|--------|---------------|------|-------------|--------------|--------------|---------|
| 1      | 4.990         | BV   | 0.0543      | 503.34460    | 142.38148    | 5.7382  |
| 2      | 7.187         | VB   | 0.0493      | 3898.15112   | 1256.08765   | 44.4397 |
| 3      | 8.009         | BV   | 0.0506      | 1642.58325   | 511.23456    | 18.7258 |
| 4      | 8.203         | VV   | 0.0623      | 21.99875     | 5.06778      | 0.2508  |
| 5      | 8.559         | VV   | 0.1649      | 26.70543     | 2.03338      | 0.3044  |
| 6      | 8.757         | VV   | 0.0475      | 2678.99780   | 872.28619    | 30.5411 |

Totals : 8771.78096 2789.09105

=====  
\*\*\* End of Report \*\*\*

Data File C:\Chem32\1\Data\Oct19\Seq\_daily 2019-10-30 14-13-44\CY\_KS14\_6.D  
Sample Name: CY\_KS14\_6

```
=====
Acq. Operator   : SYSTEM                      Seq. Line :   13
Acq. Instrument : 6130B LCMS                 Location  :    9
Injection Date  : 30-Oct-19 6:12:34 PM      Inj       :    1
                                           Inj Volume: 10.000 µl
Method          : C:\Chem32\1\Data\Oct19\Seq_daily 2019-10-30 14-13-44\PORO_AMMACE_214_70.M (
                : Sequence Method)
Last changed    : 30-Oct-19 2:13:44 PM by SYSTEM
Method Info     : method for Poroshell 120 4.6 x75 x2.7um
=====
```

Additional Info : Peak(s) manually integrated

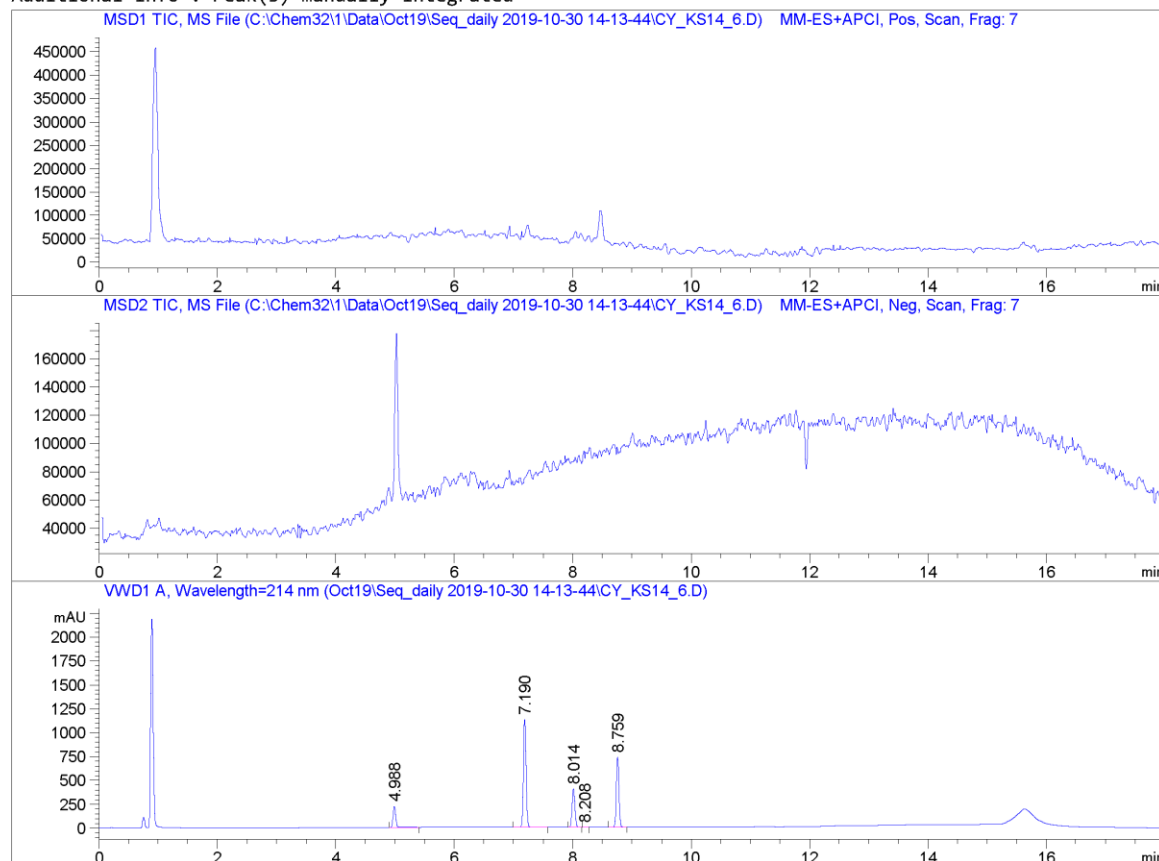

=====  
Area Percent Report  
=====

```
Sorted By      : Signal
Multiplier     : 1.0000
Dilution       : 1.0000
Use Multiplier & Dilution Factor with ISTDs
```

Data File C:\Chem32\1\Data\Oct19\Seq\_daily 2019-10-30 14-13-44\CY\_KS14\_6.D  
Sample Name: CY\_KS14\_6

Signal 1: MSD1 TIC, MS File

Signal 2: MSD2 TIC, MS File

Signal 3: VWD1 A, Wavelength=214 nm

| Peak # | RetTime [min] | Type | Width [min] | Area [mAU*s] | Height [mAU] | Area %  |
|--------|---------------|------|-------------|--------------|--------------|---------|
| 1      | 4.988         | BV   | 0.0510      | 759.91699    | 225.23894    | 9.7251  |
| 2      | 7.190         | VB   | 0.0479      | 3522.59814   | 1134.93628   | 45.0806 |
| 3      | 8.014         | BV   | 0.0506      | 1295.47021   | 403.38464    | 16.5788 |
| 4      | 8.208         | VB   | 0.0482      | 8.28321      | 2.64713      | 0.1060  |
| 5      | 8.759         | BV   | 0.0471      | 2227.73560   | 732.49530    | 28.5095 |

Totals : 7814.00416 2498.70229

=====  
\*\*\* End of Report \*\*\*

Data File C:\Chem32\1\Data\Oct19\Seq\_daily 2019-10-30 14-13-44\CY\_KS14\_7.D  
Sample Name: CY\_KS14\_7

```
=====
Acq. Operator   : SYSTEM                      Seq. Line :   14
Acq. Instrument : 6130B LCMS                 Location  :   10
Injection Date  : 30-Oct-19 6:32:27 PM      Inj       :    1
                                           Inj Volume: 10.000 µl
Method         : C:\Chem32\1\Data\Oct19\Seq_daily 2019-10-30 14-13-44\PORO_AMMACE_214_70.M (
                Sequence Method)
Last changed   : 30-Oct-19 2:13:44 PM by SYSTEM
Method Info    : method for Poroshell 120 4.6 x75 x2.7um
=====
```

Additional Info : Peak(s) manually integrated

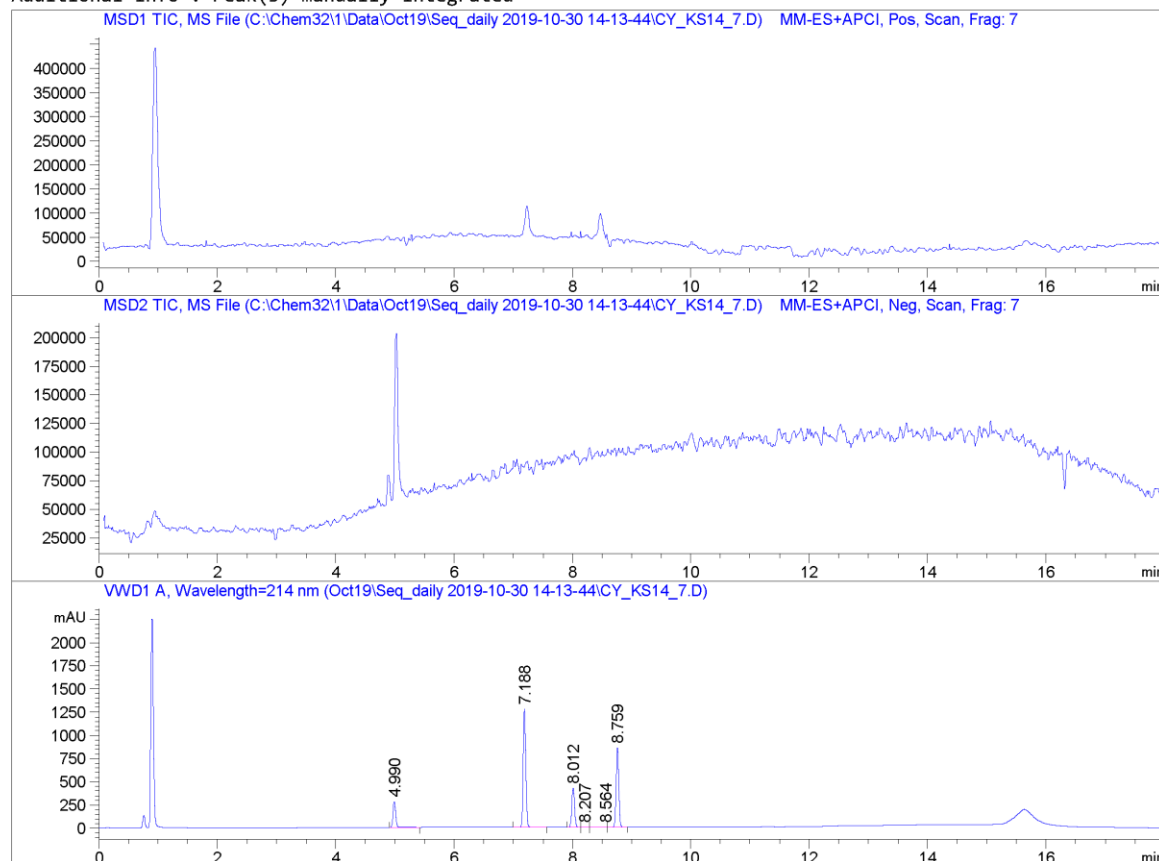

```
=====
                          Area Percent Report
=====
```

```
Sorted By      :      Signal
Multiplier     :      1.0000
Dilution      :      1.0000
Use Multiplier & Dilution Factor with ISTDs
```



Data File C:\Chem32\1\Data\Oct19\Seq\_daily 2019-10-30 14-13-44\CY\_KS14\_7.D  
Sample Name: CY\_KS14\_7

Signal 1: MSD1 TIC, MS File

Signal 2: MSD2 TIC, MS File

Signal 3: VWD1 A, Wavelength=214 nm

| Peak # | RetTime [min] | Type | Width [min] | Area [mAU*s] | Height [mAU] | Area %  |
|--------|---------------|------|-------------|--------------|--------------|---------|
| 1      | 4.990         | BV   | 0.0522      | 946.99036    | 282.44565    | 10.5391 |
| 2      | 7.188         | VB   | 0.0494      | 3980.46729   | 1280.17542   | 44.2987 |
| 3      | 8.012         | BV   | 0.0507      | 1362.33289   | 422.85211    | 15.1614 |
| 4      | 8.207         | VV   | 0.0662      | 17.51275     | 3.74745      | 0.1949  |
| 5      | 8.564         | VV   | 0.1722      | 29.81522     | 2.16684      | 0.3318  |
| 6      | 8.759         | VV   | 0.0476      | 2648.39087   | 859.23358    | 29.4740 |

Totals : 8985.50937 2850.62104

=====  
\*\*\* End of Report \*\*\*

```
=====
Acq. Operator   : SYSTEM                      Seq. Line :   16
Acq. Instrument : 6130B LCMS                 Location  :   11
Injection Date  : 30-Oct-19 7:12:17 PM      Inj       :    1
                                           Inj Volume: 10.000 µl
Method         : C:\Chem32\1\Data\Oct19\Seq_daily 2019-10-30 14-13-44\PORO_AMMACE_214_70.M (
                Sequence Method)
Last changed    : 30-Oct-19 2:13:44 PM by SYSTEM
Method Info     : method for Poroshell 120 4.6 x75 x2.7um
=====
```

Additional Info : Peak(s) manually integrated

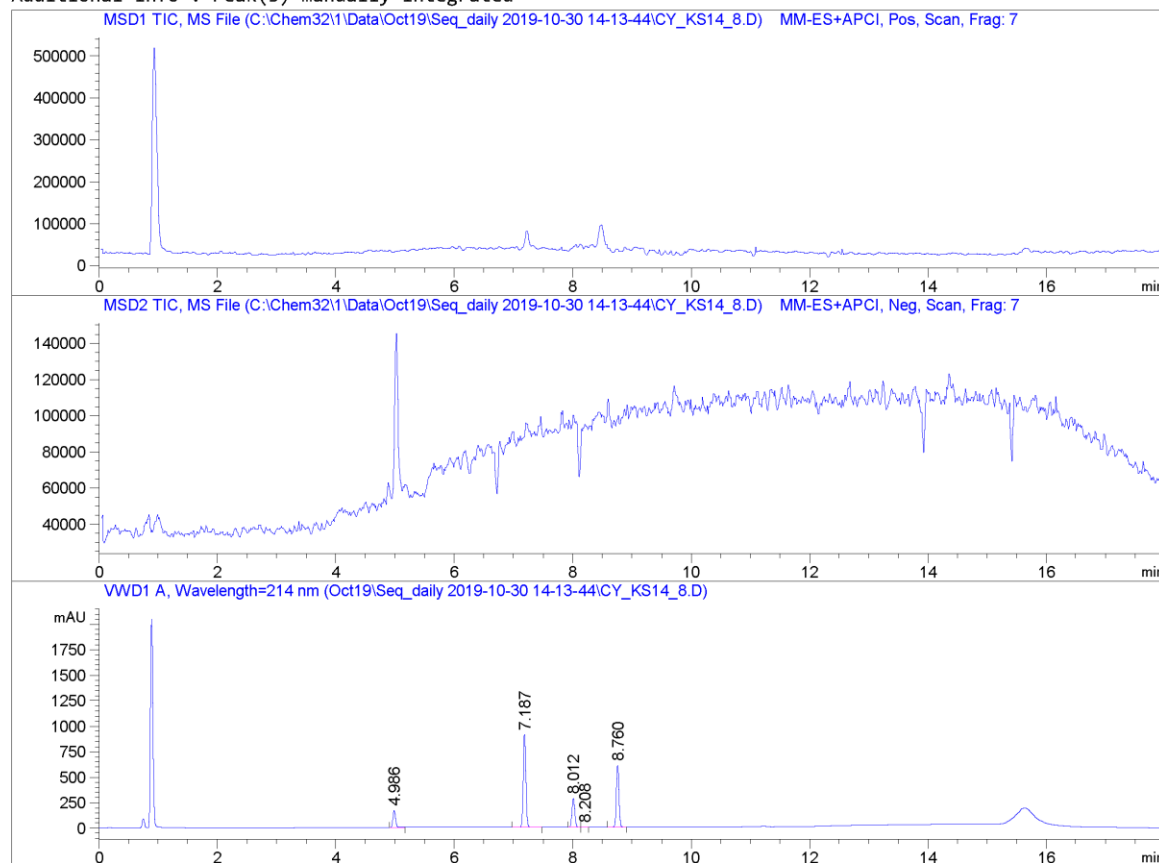

=====  
Area Percent Report  
=====

```
Sorted By      :      Signal
Multiplier     :      1.0000
Dilution       :      1.0000
Use Multiplier & Dilution Factor with ISTDs
```

Data File C:\Chem32\1\Data\Oct19\Seq\_daily 2019-10-30 14-13-44\CY\_KS14\_8.D  
Sample Name: CY\_KS14\_8

Signal 1: MSD1 TIC, MS File

Signal 2: MSD2 TIC, MS File

Signal 3: VWD1 A, Wavelength=214 nm

| Peak # | RetTime [min] | Type | Width [min] | Area [mAU*s] | Height [mAU] | Area %  |
|--------|---------------|------|-------------|--------------|--------------|---------|
| 1      | 4.986         | BB   | 0.0482      | 531.78156    | 169.91632    | 8.7217  |
| 2      | 7.187         | VB   | 0.0475      | 2791.81250   | 908.80664    | 45.7881 |
| 3      | 8.012         | BV   | 0.0504      | 911.70233    | 285.12402    | 14.9527 |
| 4      | 8.208         | VB   | 0.0467      | 5.94825      | 1.89950      | 0.0976  |
| 5      | 8.760         | VV   | 0.0473      | 1856.00537   | 607.69055    | 30.4400 |

Totals :                   6097.25001 1973.43703

=====  
\*\*\* End of Report \*\*\*

Data File C:\Chem32\1\Data\Oct19\Seq\_daily 2019-10-30 14-13-44\CY\_KS14\_9.D  
Sample Name: CY\_KS14\_9

```
=====
Acq. Operator   : SYSTEM                      Seq. Line :   17
Acq. Instrument : 6130B LCMS                 Location  :   12
Injection Date  : 30-Oct-19 7:31:53 PM      Inj       :    1
                                           Inj Volume: 10.000 µl
Method         : C:\Chem32\1\Data\Oct19\Seq_daily 2019-10-30 14-13-44\PORO_AMMACE_214_70.M (
                Sequence Method)
Last changed   : 30-Oct-19 2:13:44 PM by SYSTEM
Method Info    : method for Poroshell 120 4.6 x75 x2.7µm
=====
```

Additional Info : Peak(s) manually integrated

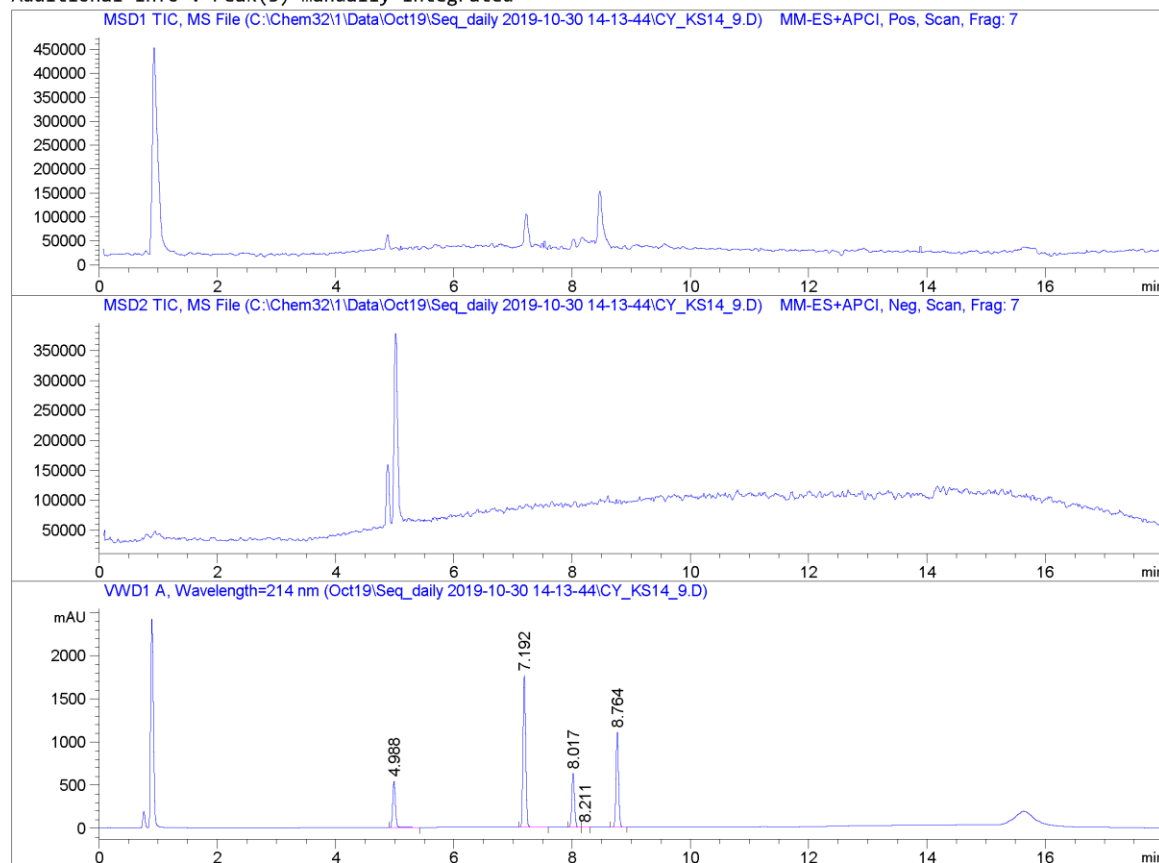

```
=====
                          Area Percent Report
=====
```

```
Sorted By      :      Signal
Multiplier     :      1.0000
Dilution       :      1.0000
Use Multiplier & Dilution Factor with ISTDs
```

Signal 1: MSD1 TIC, MS File

Signal 2: MSD2 TIC, MS File

Signal 3: VWD1 A, Wavelength=214 nm

| Peak # | RetTime [min] | Type | Width [min] | Area [mAU*s] | Height [mAU] | Area %  |
|--------|---------------|------|-------------|--------------|--------------|---------|
| 1      | 4.988         | BV   | 0.0497      | 1769.19775   | 541.99048    | 14.0423 |
| 2      | 7.192         | BB   | 0.0480      | 5491.95947   | 1760.93274   | 43.5903 |
| 3      | 8.017         | BV   | 0.0505      | 1991.66907   | 622.03577    | 15.8081 |
| 4      | 8.211         | VB   | 0.0484      | 12.36854     | 3.78086      | 0.0982  |
| 5      | 8.764         | BV   | 0.0470      | 3333.84448   | 1101.54578   | 26.4611 |

Totals : 1.25990e4 4030.28562

=====  
\*\*\* End of Report \*\*\*

Data File C:\Chem32\1\Data\Oct19\Seq\_daily 2019-10-30 14-13-44\CY\_KS14\_10.D  
Sample Name: CY\_KS14\_10

```
=====
Acq. Operator   : SYSTEM                      Seq. Line :   34
Acq. Instrument : 6130B LCMS                  Location  :   13
Injection Date  : 31-Oct-19 1:05:49 AM       Inj       :    1
                                           Inj Volume: 10.000 µl
Method         : C:\Chem32\1\Data\Oct19\Seq_daily 2019-10-30 14-13-44\PORO_AMMACE_214_70.M (
                Sequence Method)
Last changed    : 30-Oct-19 2:13:44 PM by SYSTEM
Method Info     : method for Poroshell 120 4.6 x75 x2.7µm
=====
```

Additional Info : Peak(s) manually integrated

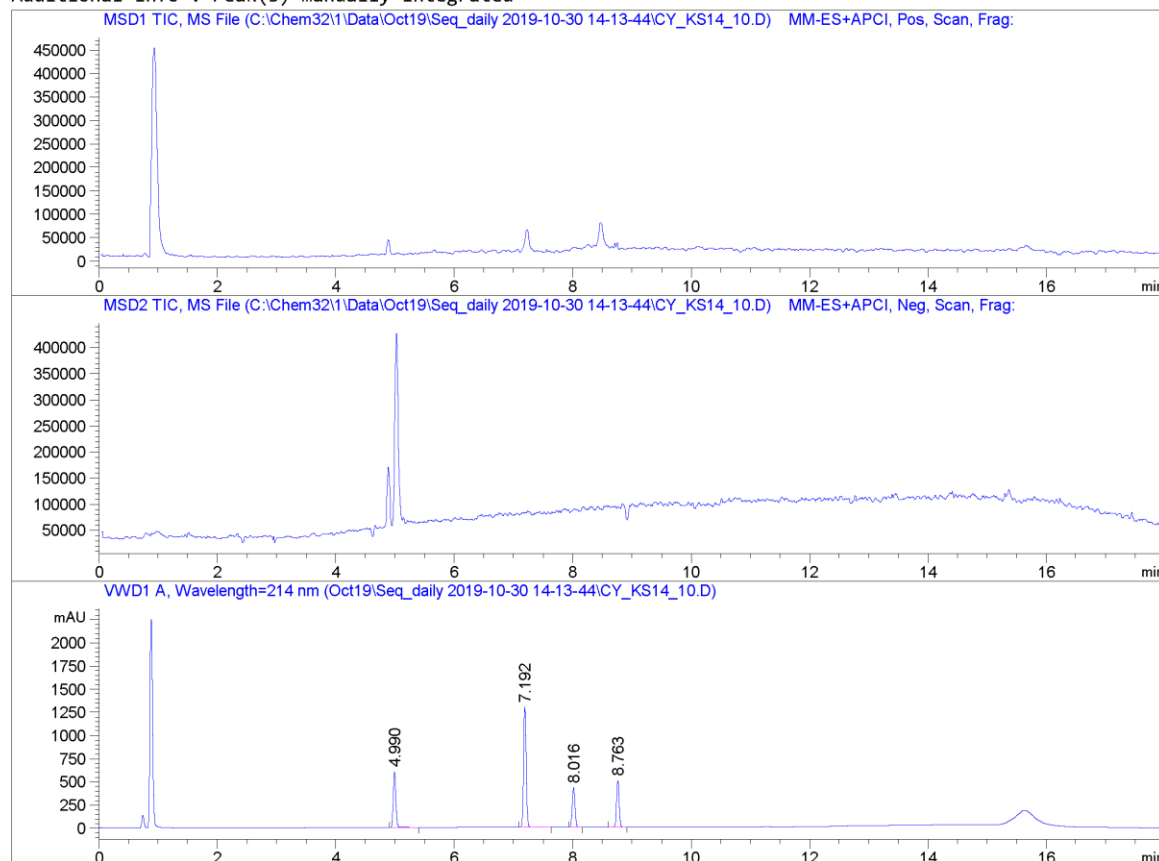

```
=====
                          Area Percent Report
=====
```

```
Sorted By      :      Signal
Multiplier     :      1.0000
Dilution       :      1.0000
Use Multiplier & Dilution Factor with ISTDs
```

Data File C:\Chem32\1\Data\Oct19\Seq\_daily 2019-10-30 14-13-44\CY\_KS14\_10.D  
Sample Name: CY\_KS14\_10

Signal 1: MSD1 TIC, MS File

Signal 2: MSD2 TIC, MS File

Signal 3: VWD1 A, Wavelength=214 nm

| Peak # | RetTime [min] | Type | Width [min] | Area [mAU*s] | Height [mAU] | Area %  |
|--------|---------------|------|-------------|--------------|--------------|---------|
| 1      | 4.990         | BV   | 0.0480      | 1890.69495   | 607.55341    | 21.5464 |
| 2      | 7.192         | BB   | 0.0489      | 3999.90137   | 1302.51331   | 45.5830 |
| 3      | 8.016         | BV   | 0.0487      | 1360.69885   | 428.00900    | 15.5066 |
| 4      | 8.763         | BV   | 0.0469      | 1523.68726   | 504.91229    | 17.3640 |

Totals : 8774.98242 2842.98801

=====  
\*\*\* End of Report \*\*\*

Data File C:\Chem32\1\Data\Oct19\Seq\_daily 2019-10-30 14-13-44\CY\_KS14\_11.D  
Sample Name: CY\_KS14\_11

```
=====
Acq. Operator   : SYSTEM                      Seq. Line :   35
Acq. Instrument : 6130B LCMS                 Location  :   14
Injection Date  : 31-Oct-19 1:25:24 AM      Inj       :    1
                                           Inj Volume: 10.000 µl
Method         : C:\Chem32\1\Data\Oct19\Seq_daily 2019-10-30 14-13-44\PORO_AMMACE_214_70.M (
                Sequence Method)
Last changed   : 30-Oct-19 2:13:44 PM by SYSTEM
Method Info    : method for Poroshell 120 4.6 x75 x2.7um
=====
```

Additional Info : Peak(s) manually integrated

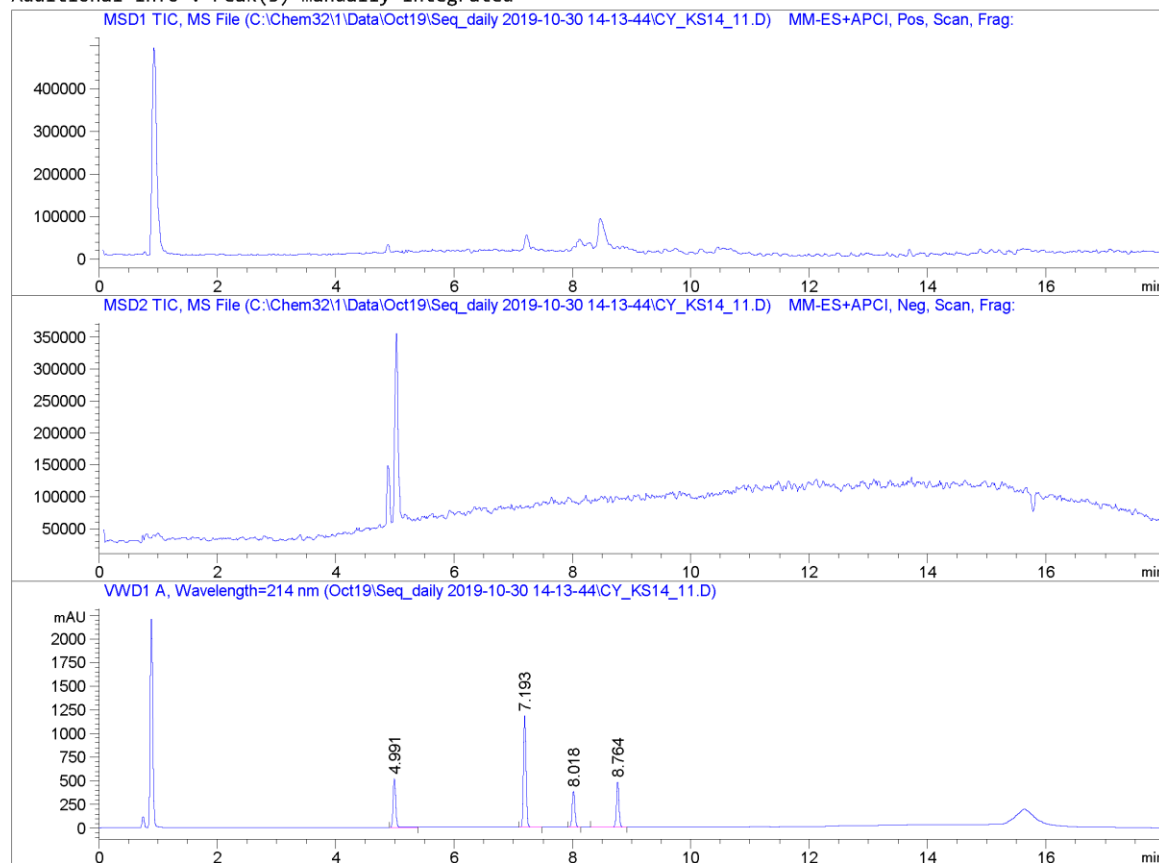

```
=====
                          Area Percent Report
=====
```

```
Sorted By      :      Signal
Multiplier     :      1.0000
Dilution       :      1.0000
Use Multiplier & Dilution Factor with ISTDs
```



Data File C:\Chem32\1\Data\Oct19\Seq\_daily 2019-10-30 14-13-44\CY\_KS14\_11.D  
Sample Name: CY\_KS14\_11

Signal 1: MSD1 TIC, MS File

Signal 2: MSD2 TIC, MS File

Signal 3: VWD1 A, Wavelength=214 nm

| Peak # | RetTime [min] | Type | Width [min] | Area [mAU*s] | Height [mAU] | Area %  |
|--------|---------------|------|-------------|--------------|--------------|---------|
| 1      | 4.991         | BB   | 0.0480      | 1606.82959   | 515.60278    | 20.4509 |
| 2      | 7.193         | BB   | 0.0488      | 3599.23340   | 1176.28821   | 45.8091 |
| 3      | 8.018         | BV   | 0.0501      | 1194.73254   | 376.76279    | 15.2059 |
| 4      | 8.764         | BV   | 0.0473      | 1456.22791   | 477.04208    | 18.5341 |

Totals :                                7857.02344 2545.69586

=====  
\*\*\* End of Report \*\*\*

## **Scheme 8 – Borylation Reaction with Non-preheated Catalyst Solution**

Data File C:\Chem32\1\Data\Nov19\Seq\_daily 2019-11-26 13-10-17\CY\_KS\_21\_0.D  
Sample Name: CY\_KS\_21\_0

```
=====
Acq. Operator   : SYSTEM                      Seq. Line :    8
Acq. Instrument : 6130B LCMS                  Location  :   51
Injection Date  : 26-Nov-19 3:29:58 PM       Inj       :    1
                                           Inj Volume: 10.000 µl
Method          : C:\Chem32\1\Data\Nov19\Seq_daily 2019-11-26 13-10-17\PORO_AMMACE_214_70.M (
                  Sequence Method)
Last changed    : 26-Nov-19 2:13:51 PM by SYSTEM
Method Info     : method for Poroshell 120 4.6 x75 x2.7µm
=====
```

Additional Info : Peak(s) manually integrated

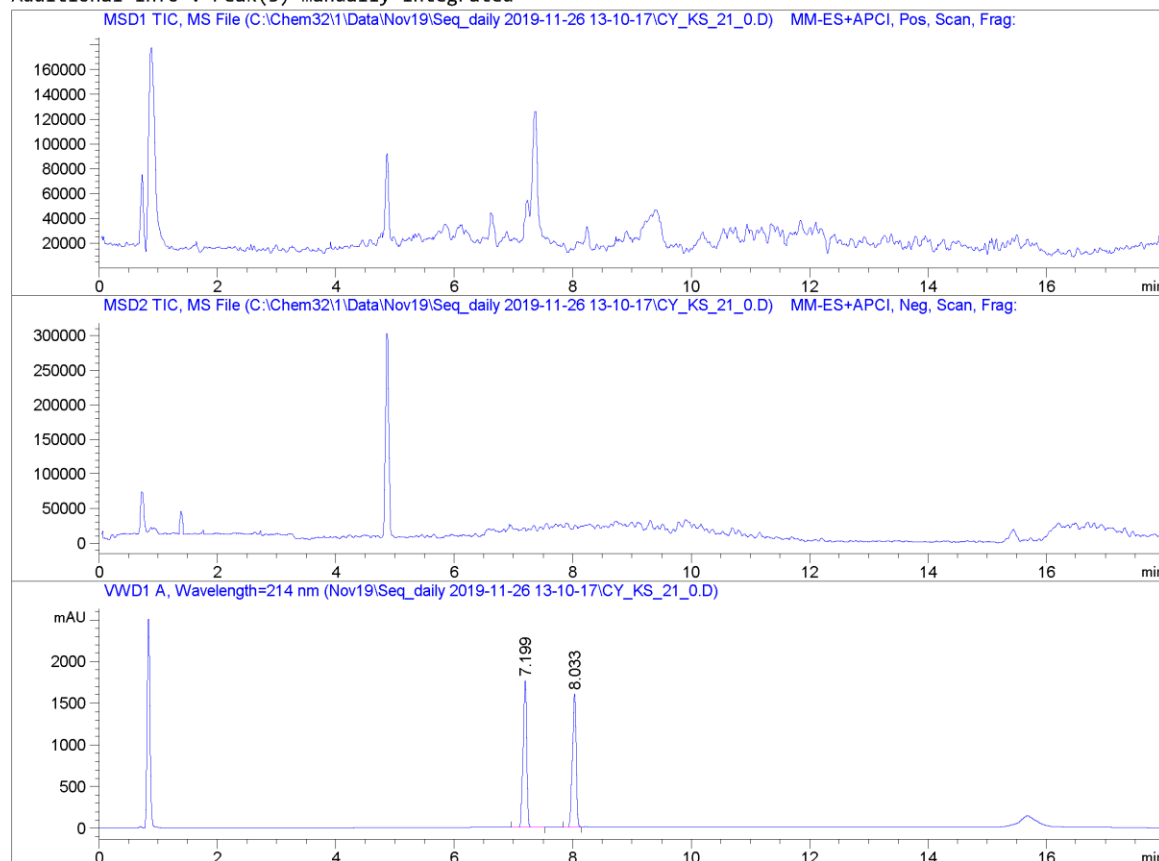

```
=====
                          Area Percent Report
=====
```

```
Sorted By      :      Signal
Multiplier     :      1.0000
Dilution       :      1.0000
Use Multiplier & Dilution Factor with ISTDs
```

Data File C:\Chem32\1\Data\Nov19\Seq\_daily 2019-11-26 13-10-17\CY\_KS\_21\_0.D  
Sample Name: CY\_KS\_21\_0

Signal 1: MSD1 TIC, MS File

Signal 2: MSD2 TIC, MS File

Signal 3: VWD1 A, Wavelength=214 nm

| Peak # | RetTime [min] | Type | Width [min] | Area [mAU*s] | Height [mAU] | Area %  |
|--------|---------------|------|-------------|--------------|--------------|---------|
| 1      | 7.199         | VB   | 0.0618      | 7343.55420   | 1760.91309   | 51.1996 |
| 2      | 8.033         | BV   | 0.0657      | 6999.43408   | 1595.62891   | 48.8004 |

Totals : 1.43430e4 3356.54199

=====  
\*\*\* End of Report \*\*\*

Data File C:\Chem32\1\Data\Nov19\Seq\_daily 2019-11-26 13-10-17\CY\_KS\_21\_1.D  
Sample Name: CY\_KS\_21\_1

```
=====
Acq. Operator   : SYSTEM                      Seq. Line :    9
Acq. Instrument : 6130B LCMS                 Location  :   52
Injection Date  : 26-Nov-19 3:49:32 PM      Inj       :    1
                                           Inj Volume: 10.000 µl
Method          : C:\Chem32\1\Data\Nov19\Seq_daily 2019-11-26 13-10-17\PORO_AMMACE_214_70.M (
                : Sequence Method)
Last changed    : 26-Nov-19 2:13:51 PM by SYSTEM
Method Info     : method for Poroshell 120 4.6 x75 x2.7um
=====
```

Additional Info : Peak(s) manually integrated

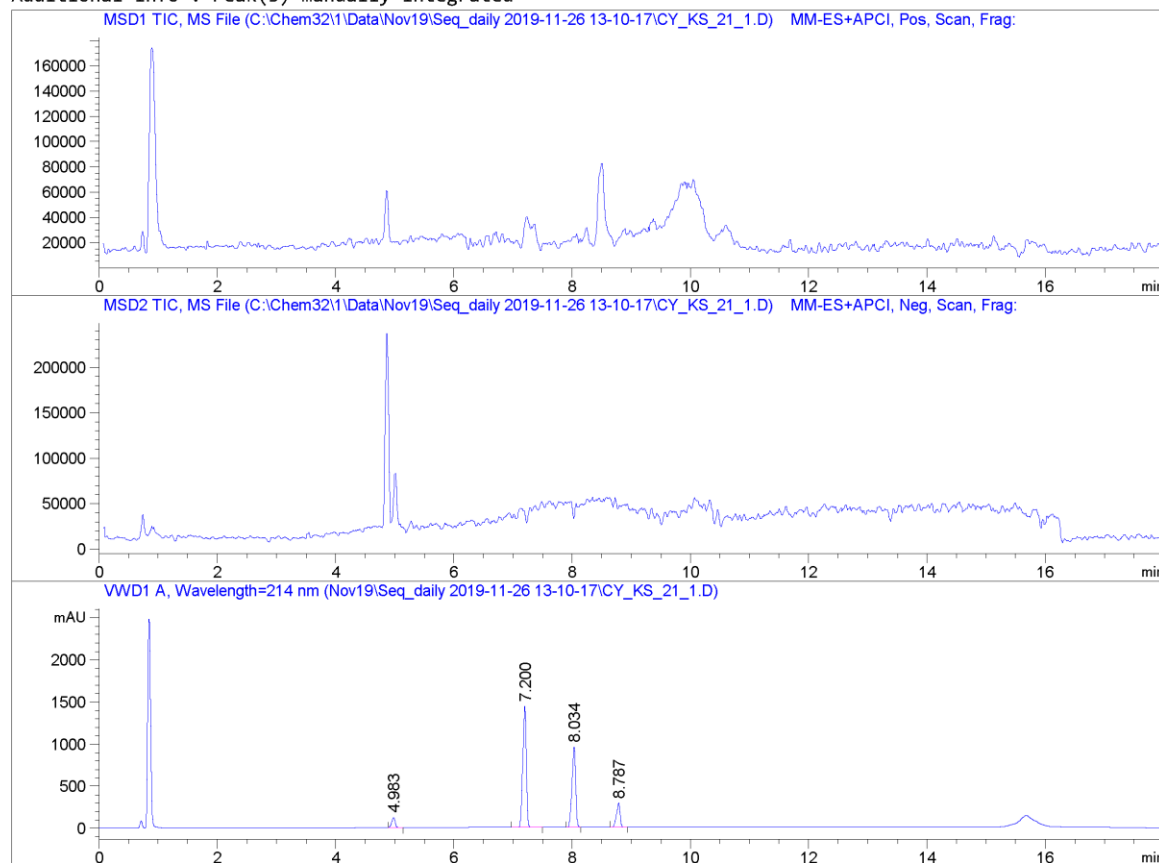

=====  
Area Percent Report  
=====

```
Sorted By      : Signal
Multiplier     : 1.0000
Dilution       : 1.0000
Use Multiplier & Dilution Factor with ISTDs
```

Data File C:\Chem32\1\Data\Nov19\Seq\_daily 2019-11-26 13-10-17\CY\_KS\_21\_1.D  
Sample Name: CY\_KS\_21\_1

Signal 1: MSD1 TIC, MS File

Signal 2: MSD2 TIC, MS File

Signal 3: VWD1 A, Wavelength=214 nm

| Peak # | RetTime [min] | Type | Width [min] | Area [mAU*s] | Height [mAU] | Area %  |
|--------|---------------|------|-------------|--------------|--------------|---------|
| 1      | 4.983         | BB   | 0.0596      | 496.07339    | 124.55663    | 4.2278  |
| 2      | 7.200         | VB   | 0.0609      | 5901.26367   | 1441.25977   | 50.2936 |
| 3      | 8.034         | BV   | 0.0649      | 4124.48828   | 956.32281    | 35.1510 |
| 4      | 8.787         | VV   | 0.0624      | 1211.79822   | 286.57910    | 10.3276 |

Totals :                            1.17336e4  2808.71832

=====  
\*\*\* End of Report \*\*\*

Data File C:\Chem32\1\Data\Nov19\Seq\_daily 2019-11-26 13-10-17\CY\_KS\_21\_2.D  
Sample Name: CY\_KS\_21\_2

```
=====
Acq. Operator   : SYSTEM                      Seq. Line :   10
Acq. Instrument : 6130B LCMS                  Location  :   53
Injection Date  : 26-Nov-19 4:09:08 PM       Inj       :    1
                                           Inj Volume: 10.000 µl
Method          : C:\Chem32\1\Data\Nov19\Seq_daily 2019-11-26 13-10-17\PORO_AMMACE_214_70.M (
                : Sequence Method)
Last changed    : 26-Nov-19 2:13:51 PM by SYSTEM
Method Info     : method for Poroshell 120 4.6 x75 x2.7um
=====
```

Additional Info : Peak(s) manually integrated

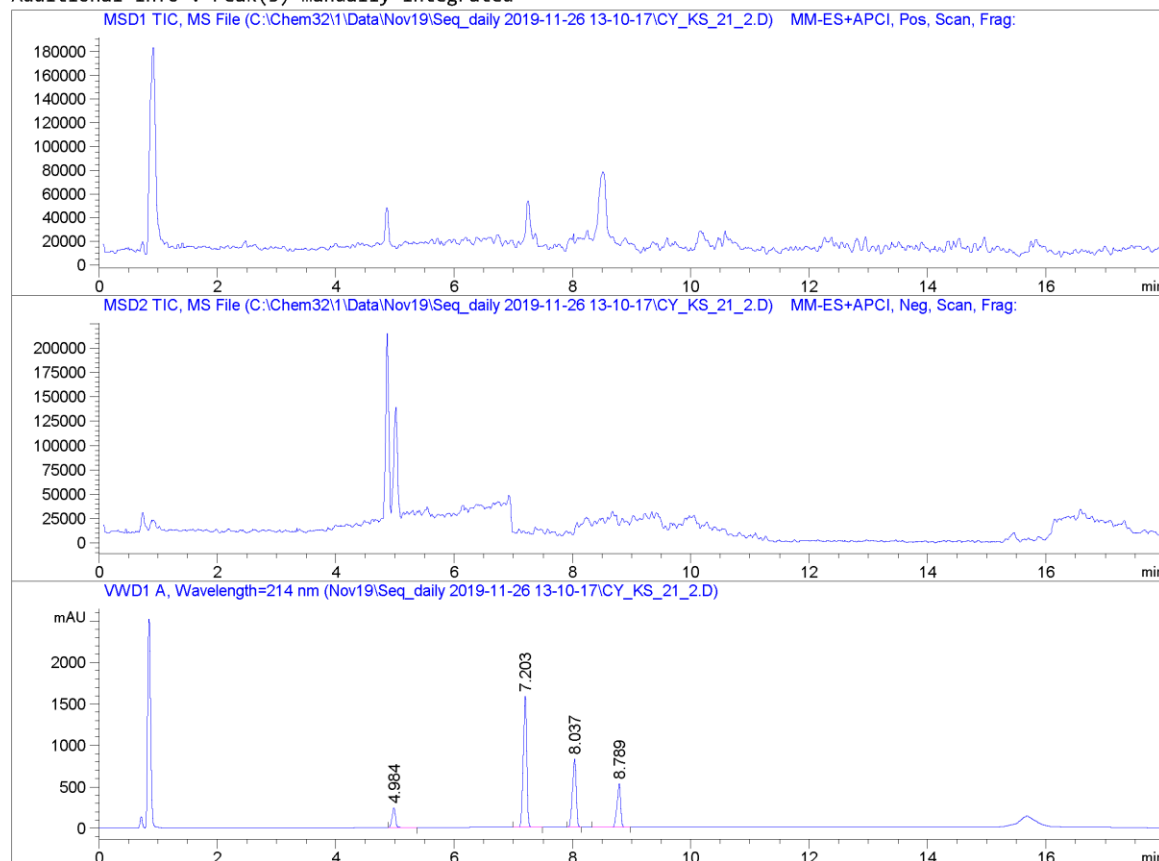

=====  
Area Percent Report  
=====

```
Sorted By      : Signal
Multiplier     : 1.0000
Dilution       : 1.0000
Use Multiplier & Dilution Factor with ISTDs
```

Data File C:\Chem32\1\Data\Nov19\Seq\_daily 2019-11-26 13-10-17\CY\_KS\_21\_2.D  
Sample Name: CY\_KS\_21\_2

Signal 1: MSD1 TIC, MS File

Signal 2: MSD2 TIC, MS File

Signal 3: VWD1 A, Wavelength=214 nm

| Peak # | RetTime [min] | Type | Width [min] | Area [mAU*s] | Height [mAU] | Area %  |
|--------|---------------|------|-------------|--------------|--------------|---------|
| 1      | 4.984         | VV   | 0.0616      | 998.71948    | 240.24475    | 7.4890  |
| 2      | 7.203         | VB   | 0.0613      | 6523.60986   | 1579.24976   | 48.9180 |
| 3      | 8.037         | BV   | 0.0637      | 3583.00903   | 826.92700    | 26.8676 |
| 4      | 8.789         | BV   | 0.0614      | 2230.45972   | 523.48090    | 16.7254 |

Totals : 1.33358e4 3169.90240

=====  
\*\*\* End of Report \*\*\*



Data File C:\Chem32\1\Data\Nov19\Seq\_daily 2019-11-26 13-10-17\CY\_KS\_21\_3.D  
Sample Name: CY\_KS\_21\_3

```
=====
Acq. Operator   : SYSTEM                      Seq. Line :   11
Acq. Instrument : 6130B LCMS                 Location  :   54
Injection Date  : 26-Nov-19 4:28:44 PM      Inj       :    1
                                           Inj Volume: 10.000 µl
Method         : C:\Chem32\1\Data\Nov19\Seq_daily 2019-11-26 13-10-17\PORO_AMMACE_214_70.M (
                Sequence Method)
Last changed   : 26-Nov-19 2:13:51 PM by SYSTEM
Method Info    : method for Poroshell 120 4.6 x75 x2.7um
=====
```

Additional Info : Peak(s) manually integrated

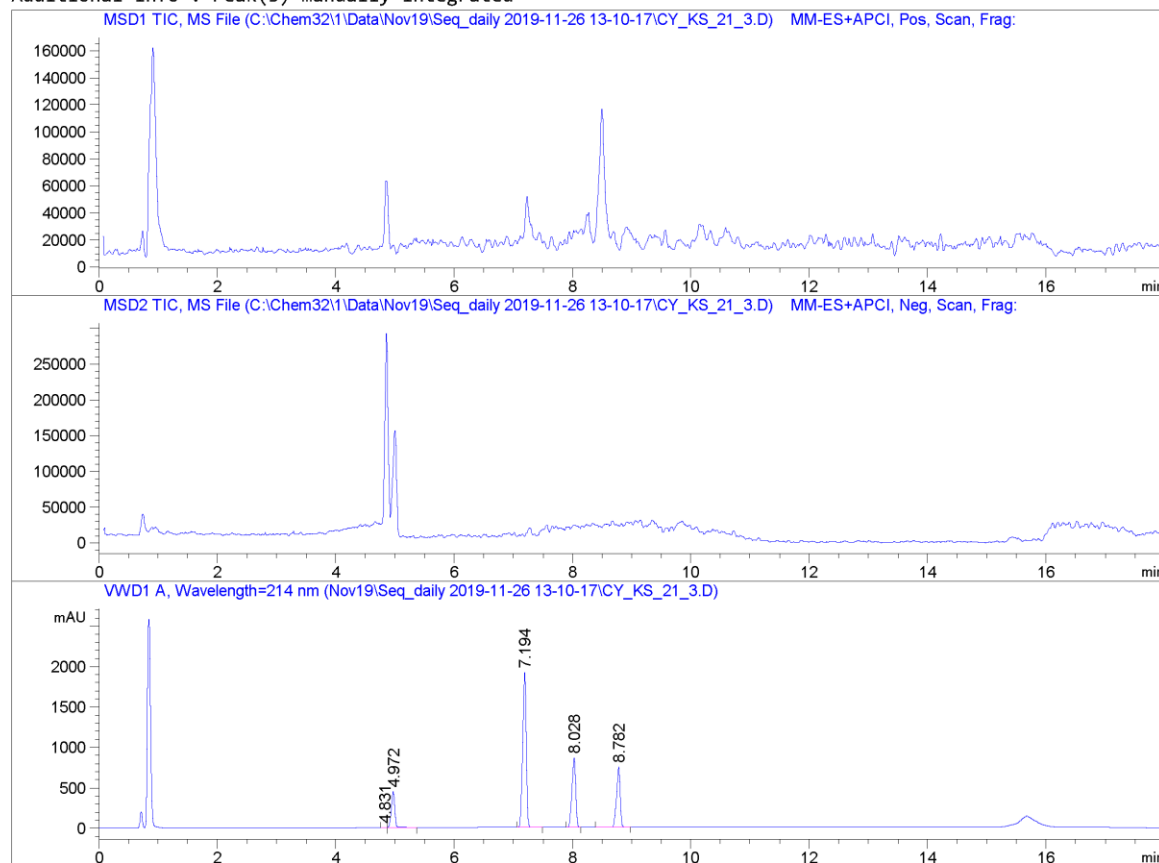

=====  
Area Percent Report  
=====

```
Sorted By      :      Signal
Multiplier     :      1.0000
Dilution       :      1.0000
Use Multiplier & Dilution Factor with ISTDs
```

Data File C:\Chem32\1\Data\Nov19\Seq\_daily 2019-11-26 13-10-17\CY\_KS\_21\_3.D  
Sample Name: CY\_KS\_21\_3

Signal 1: MSD1 TIC, MS File

Signal 2: MSD2 TIC, MS File

Signal 3: VWD1 A, Wavelength=214 nm

| Peak # | RetTime [min] | Type | Width [min] | Area [mAU*s] | Height [mAU] | Area %  |
|--------|---------------|------|-------------|--------------|--------------|---------|
| 1      | 4.831         | BV   | 0.0526      | 5.90045      | 1.74397      | 0.0353  |
| 2      | 4.972         | VV   | 0.0627      | 1842.22656   | 446.28290    | 11.0092 |
| 3      | 7.194         | BB   | 0.0619      | 8001.80029   | 1913.68896   | 47.8189 |
| 4      | 8.028         | BV   | 0.0654      | 3743.63257   | 859.81769    | 22.3720 |
| 5      | 8.782         | BV   | 0.0625      | 3140.00464   | 741.88239    | 18.7647 |

Totals : 1.67336e4 3963.41591

=====  
\*\*\* End of Report \*\*\*

```
=====
Acq. Operator   : SYSTEM                      Seq. Line :   14
Acq. Instrument : 6130B LCMS                 Location  :   55
Injection Date  : 26-Nov-19 5:27:54 PM      Inj       :    1
                                           Inj Volume: 10.000 µl
Method         : C:\Chem32\1\Data\Nov19\Seq_daily 2019-11-26 13-10-17\PORO_AMMACE_214_70.M (
                Sequence Method)
Last changed   : 26-Nov-19 2:13:51 PM by SYSTEM
Method Info    : method for Poroshell 120 4.6 x75 x2.7um
=====
```

Additional Info : Peak(s) manually integrated

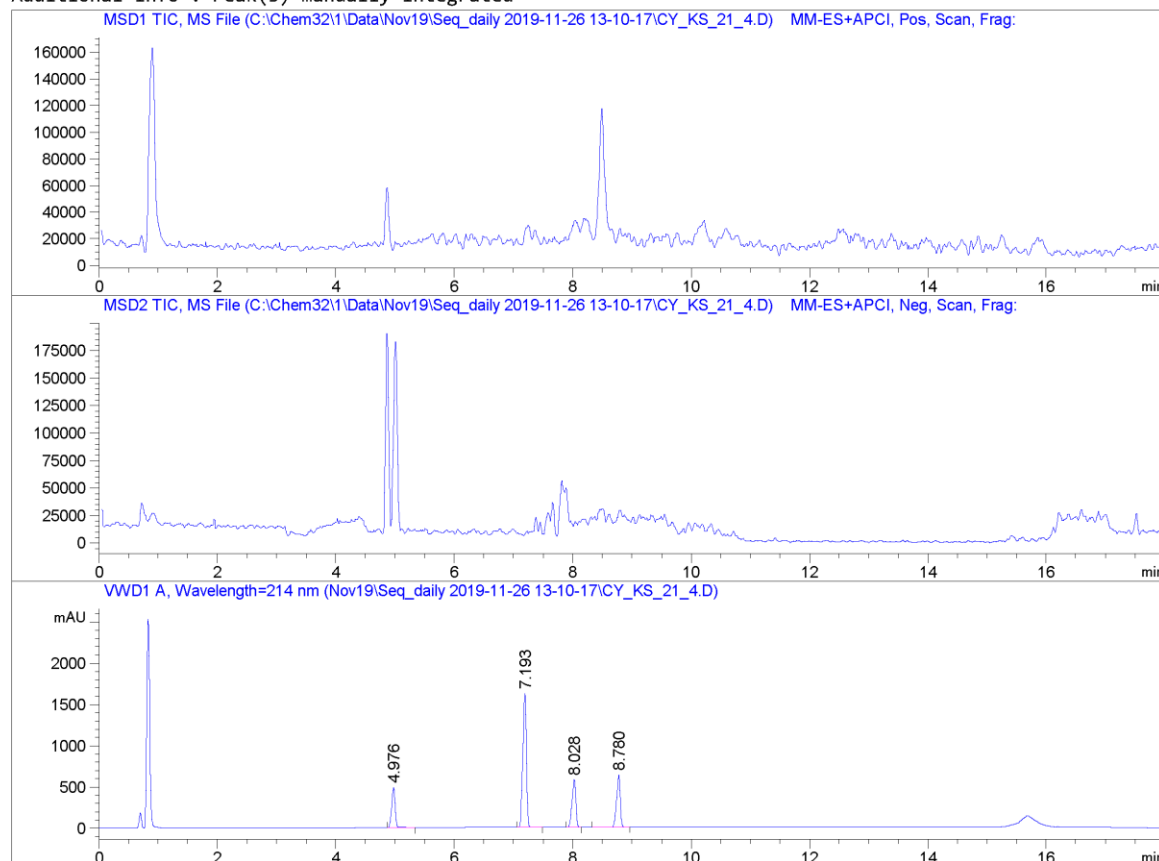

```
=====
                          Area Percent Report
=====
```

```
Sorted By      :      Signal
Multiplier     :      1.0000
Dilution       :      1.0000
Use Multiplier & Dilution Factor with ISTDs
```

Signal 1: MSD1 TIC, MS File

Signal 2: MSD2 TIC, MS File

Signal 3: VWD1 A, Wavelength=214 nm

| Peak # | RetTime [min] | Type | Width [min] | Area [mAU*s] | Height [mAU] | Area %  |
|--------|---------------|------|-------------|--------------|--------------|---------|
| 1      | 4.976         | VV   | 0.0629      | 2030.24597   | 490.44662    | 14.4207 |
| 2      | 7.193         | BB   | 0.0632      | 6763.53760   | 1621.19019   | 48.0410 |
| 3      | 8.028         | BV   | 0.0657      | 2523.23267   | 575.54480    | 17.9224 |
| 4      | 8.780         | VV   | 0.0626      | 2761.67383   | 631.83099    | 19.6160 |

Totals : 1.40787e4 3319.01260

=====  
\*\*\* End of Report \*\*\*

Data File C:\Chem32\1\Data\Nov19\Seq\_daily 2019-11-26 13-10-17\CY\_KS\_21\_5.D  
Sample Name: CY\_KS\_21\_5

```
=====
Acq. Operator   : SYSTEM                      Seq. Line :   15
Acq. Instrument : 6130B LCMS                  Location  :   56
Injection Date  : 26-Nov-19 5:47:32 PM       Inj       :    1
                                           Inj Volume: 10.000 µl
Method         : C:\Chem32\1\Data\Nov19\Seq_daily 2019-11-26 13-10-17\PORO_AMMACE_214_70.M (
                Sequence Method)
Last changed   : 26-Nov-19 2:13:51 PM by SYSTEM
Method Info    : method for Poroshell 120 4.6 x75 x2.7um
=====
```

Additional Info : Peak(s) manually integrated

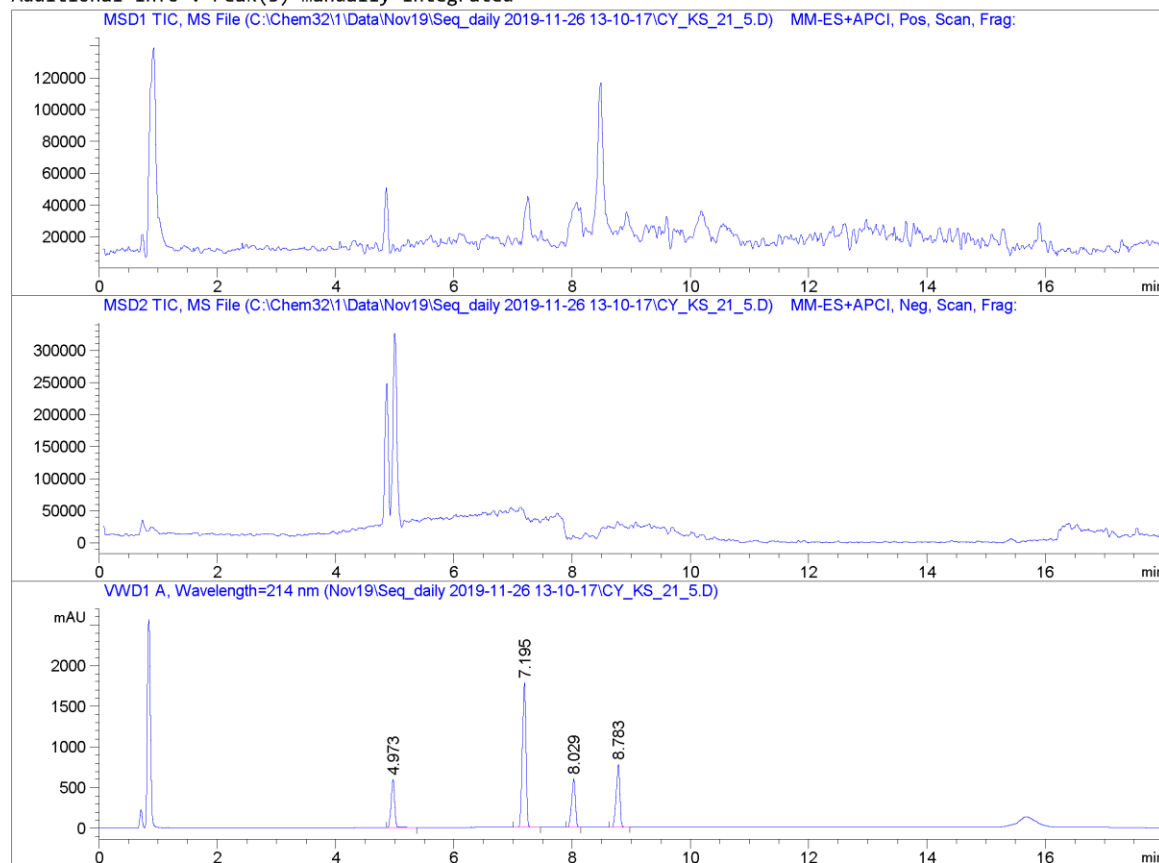

=====  
Area Percent Report  
=====

```
Sorted By      :      Signal
Multiplier     :      1.0000
Dilution       :      1.0000
Use Multiplier & Dilution Factor with ISTDs
```

Signal 1: MSD1 TIC, MS File

Signal 2: MSD2 TIC, MS File

Signal 3: VWD1 A, Wavelength=214 nm

| Peak # | RetTime [min] | Type | Width [min] | Area [mAU*s] | Height [mAU] | Area %  |
|--------|---------------|------|-------------|--------------|--------------|---------|
| 1      | 4.973         | VV   | 0.0630      | 2454.64478   | 591.52423    | 15.5047 |
| 2      | 7.195         | BV   | 0.0621      | 7472.76025   | 1781.17200   | 47.2015 |
| 3      | 8.029         | BV   | 0.0657      | 2598.99829   | 593.48499    | 16.4165 |
| 4      | 8.783         | BV   | 0.0630      | 3305.21948   | 773.07556    | 20.8773 |

Totals : 1.58316e4 3739.25677

=====  
\*\*\* End of Report \*\*\*

Data File C:\Chem32\1\Data\Nov19\Seq\_daily 2019-11-26 13-10-17\CY\_KS\_21\_6.D  
Sample Name: CY\_KS\_21\_6

```
=====
Acq. Operator   : SYSTEM                      Seq. Line :   17
Acq. Instrument : 6130B LCMS                 Location  :   57
Injection Date  : 26-Nov-19 6:27:22 PM      Inj       :    1
                                           Inj Volume: 10.000 µl
Method          : C:\Chem32\1\Data\Nov19\Seq_daily 2019-11-26 13-10-17\PORO_AMMACE_214_70.M (
                : Sequence Method)
Last changed    : 26-Nov-19 2:13:51 PM by SYSTEM
Method Info     : method for Poroshell 120 4.6 x75 x2.7um
=====
```

Additional Info : Peak(s) manually integrated

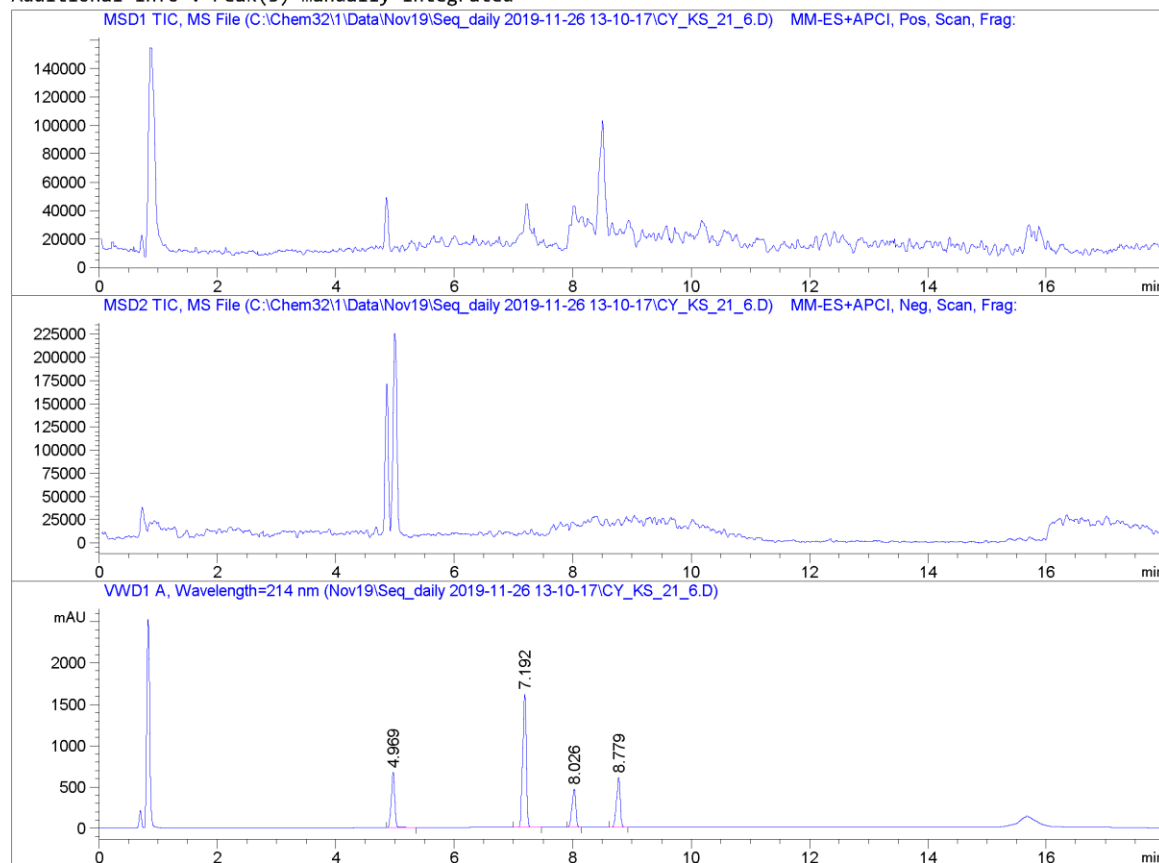

=====  
Area Percent Report  
=====

```
Sorted By      :      Signal
Multiplier     :      1.0000
Dilution       :      1.0000
Use Multiplier & Dilution Factor with ISTDs
```

Data File C:\Chem32\1\Data\Nov19\Seq\_daily 2019-11-26 13-10-17\CY\_KS\_21\_6.D  
Sample Name: CY\_KS\_21\_6

Signal 1: MSD1 TIC, MS File

Signal 2: MSD2 TIC, MS File

Signal 3: VWD1 A, Wavelength=214 nm

| Peak # | RetTime [min] | Type | Width [min] | Area [mAU*s] | Height [mAU] | Area %  |
|--------|---------------|------|-------------|--------------|--------------|---------|
| 1      | 4.969         | VV   | 0.0614      | 2786.43335   | 673.43005    | 19.6341 |
| 2      | 7.192         | BV   | 0.0623      | 6795.67432   | 1613.15320   | 47.8846 |
| 3      | 8.026         | BV   | 0.0646      | 2032.14758   | 460.48703    | 14.3192 |
| 4      | 8.779         | VB   | 0.0618      | 2577.52051   | 599.82239    | 18.1621 |

Totals : 1.41918e4 3346.89267

=====  
\*\*\* End of Report \*\*\*



Data File C:\Chem32\1\Data\Nov19\Seq\_daily 2019-11-26 13-10-17\CY\_KS\_21\_7.D  
Sample Name: CY\_KS\_21\_7

```
=====
Acq. Operator   : SYSTEM                      Seq. Line :   18
Acq. Instrument : 6130B LCMS                 Location  :   58
Injection Date  : 26-Nov-19 6:46:57 PM      Inj       :    1
                                           Inj Volume: 10.000 µl
Method          : C:\Chem32\1\Data\Nov19\Seq_daily 2019-11-26 13-10-17\PORO_AMMACE_214_70.M (
                : Sequence Method)
Last changed    : 26-Nov-19 2:13:51 PM by SYSTEM
Method Info     : method for Poroshell 120 4.6 x75 x2.7µm
=====
```

Additional Info : Peak(s) manually integrated

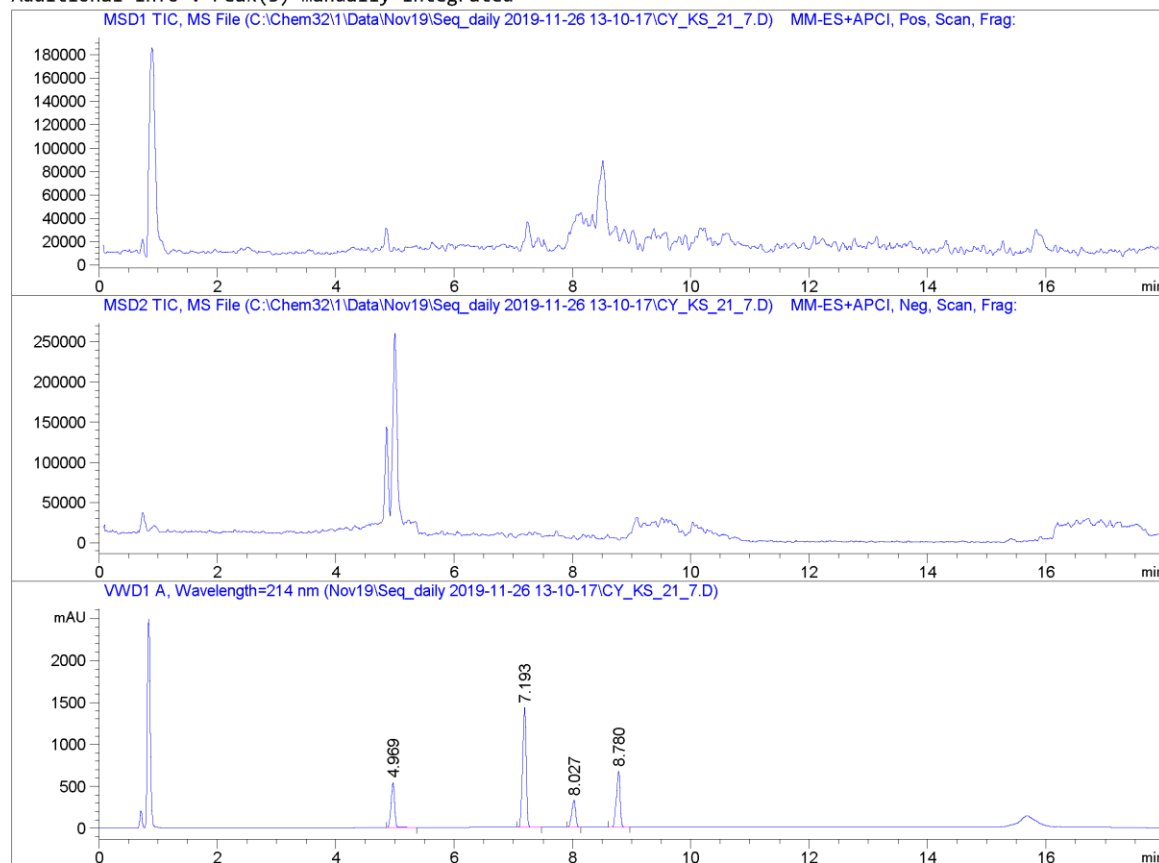

=====  
Area Percent Report  
=====

```
Sorted By      :      Signal
Multiplier     :      1.0000
Dilution       :      1.0000
Use Multiplier & Dilution Factor with ISTDs
```

Data File C:\Chem32\1\Data\Nov19\Seq\_daily 2019-11-26 13-10-17\CY\_KS\_21\_7.D  
Sample Name: CY\_KS\_21\_7

Signal 1: MSD1 TIC, MS File

Signal 2: MSD2 TIC, MS File

Signal 3: VWD1 A, Wavelength=214 nm

| Peak # | RetTime [min] | Type | Width [min] | Area [mAU*s] | Height [mAU] | Area %  |
|--------|---------------|------|-------------|--------------|--------------|---------|
| 1      | 4.969         | BV   | 0.0635      | 2273.87061   | 542.35571    | 17.9416 |
| 2      | 7.193         | BB   | 0.0624      | 6046.22070   | 1429.55090   | 47.7068 |
| 3      | 8.027         | BV   | 0.0665      | 1444.36121   | 324.48328    | 11.3965 |
| 4      | 8.780         | BV   | 0.0625      | 2909.26050   | 667.66852    | 22.9551 |

Totals : 1.26737e4 2964.05841

=====  
\*\*\* End of Report \*\*\*

Data File C:\Chem32\1\Data\Nov19\Seq\_daily 2019-11-26 13-10-17\CY\_KS\_21\_8.D  
Sample Name: CY\_KS\_21\_8

```
=====
Acq. Operator   : SYSTEM                      Seq. Line :   19
Acq. Instrument : 6130B LCMS                  Location  :   59
Injection Date  : 26-Nov-19 7:06:31 PM       Inj       :    1
                                           Inj Volume: 10.000 µl
Method          : C:\Chem32\1\Data\Nov19\Seq_daily 2019-11-26 13-10-17\PORO_AMMACE_214_70.M (
                Sequence Method)
Last changed    : 26-Nov-19 2:13:51 PM by SYSTEM
Method Info     : method for Poroshell 120 4.6 x75 x2.7µm
=====
```

Additional Info : Peak(s) manually integrated

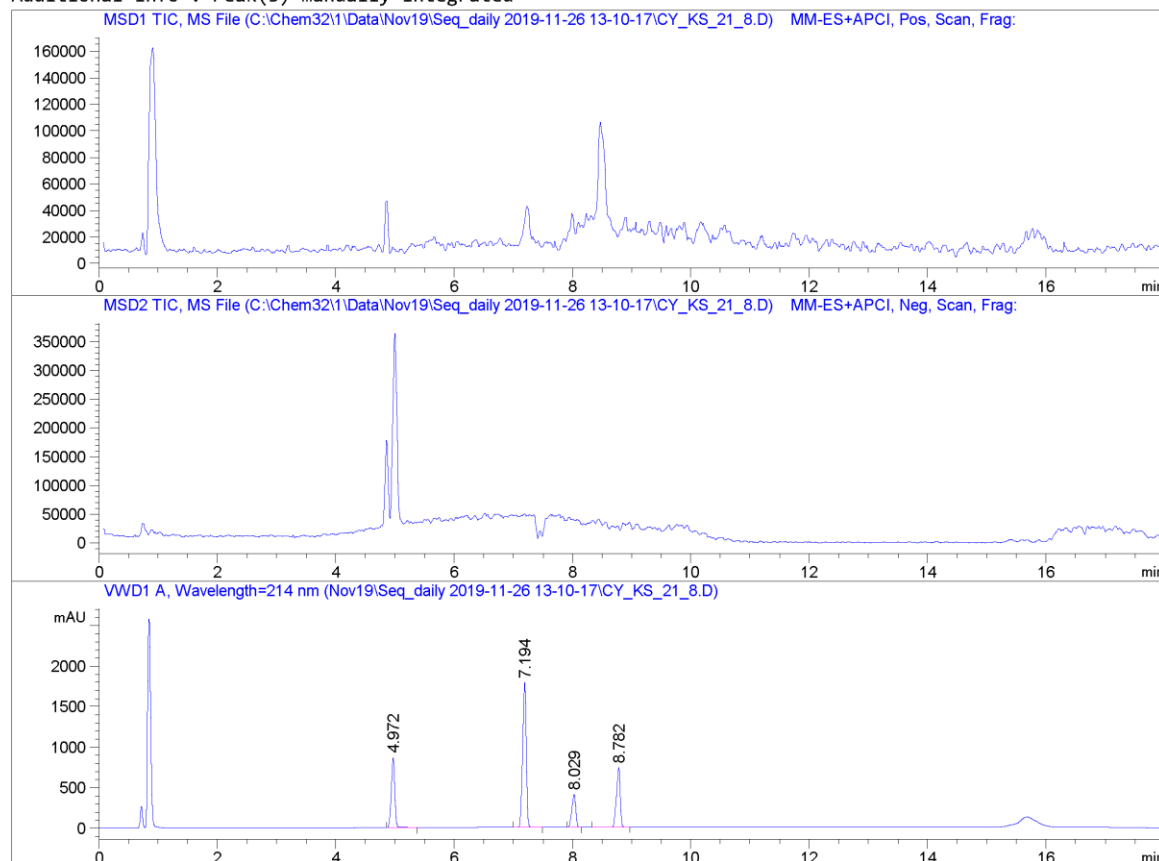

```
=====
                          Area Percent Report
=====
```

```
Sorted By      :      Signal
Multiplier     :      1.0000
Dilution       :      1.0000
Use Multiplier & Dilution Factor with ISTDs
```

Data File C:\Chem32\1\Data\Nov19\Seq\_daily 2019-11-26 13-10-17\CY\_KS\_21\_8.D  
Sample Name: CY\_KS\_21\_8

Signal 1: MSD1 TIC, MS File

Signal 2: MSD2 TIC, MS File

Signal 3: VWD1 A, Wavelength=214 nm

| Peak # | RetTime [min] | Type | Width [min] | Area [mAU*s] | Height [mAU] | Area %  |
|--------|---------------|------|-------------|--------------|--------------|---------|
| 1      | 4.972         | VV   | 0.0630      | 3595.41870   | 866.59143    | 22.0969 |
| 2      | 7.194         | BB   | 0.0643      | 7607.51514   | 1784.80261   | 46.7547 |
| 3      | 8.029         | BV   | 0.0666      | 1820.84729   | 408.46149    | 11.1907 |
| 4      | 8.782         | BV   | 0.0645      | 3247.34546   | 736.75909    | 19.9577 |

Totals : 1.62711e4 3796.61462

=====  
\*\*\* End of Report \*\*\*

Data File C:\Chem32\1\Data\Nov19\Seq\_daily 2019-11-26 13-10-17\CY\_KS\_21\_9.D  
Sample Name: CY\_KS\_21\_9

```
=====
Acq. Operator   : SYSTEM                      Seq. Line :   20
Acq. Instrument : 6130B LCMS                 Location  :   60
Injection Date  : 26-Nov-19 7:26:08 PM      Inj       :    1
                                           Inj Volume: 10.000 µl
Method         : C:\Chem32\1\Data\Nov19\Seq_daily 2019-11-26 13-10-17\PORO_AMMACE_214_70.M (
                Sequence Method)
Last changed   : 26-Nov-19 2:13:51 PM by SYSTEM
Method Info    : method for Poroshell 120 4.6 x75 x2.7µm
=====
```

Additional Info : Peak(s) manually integrated

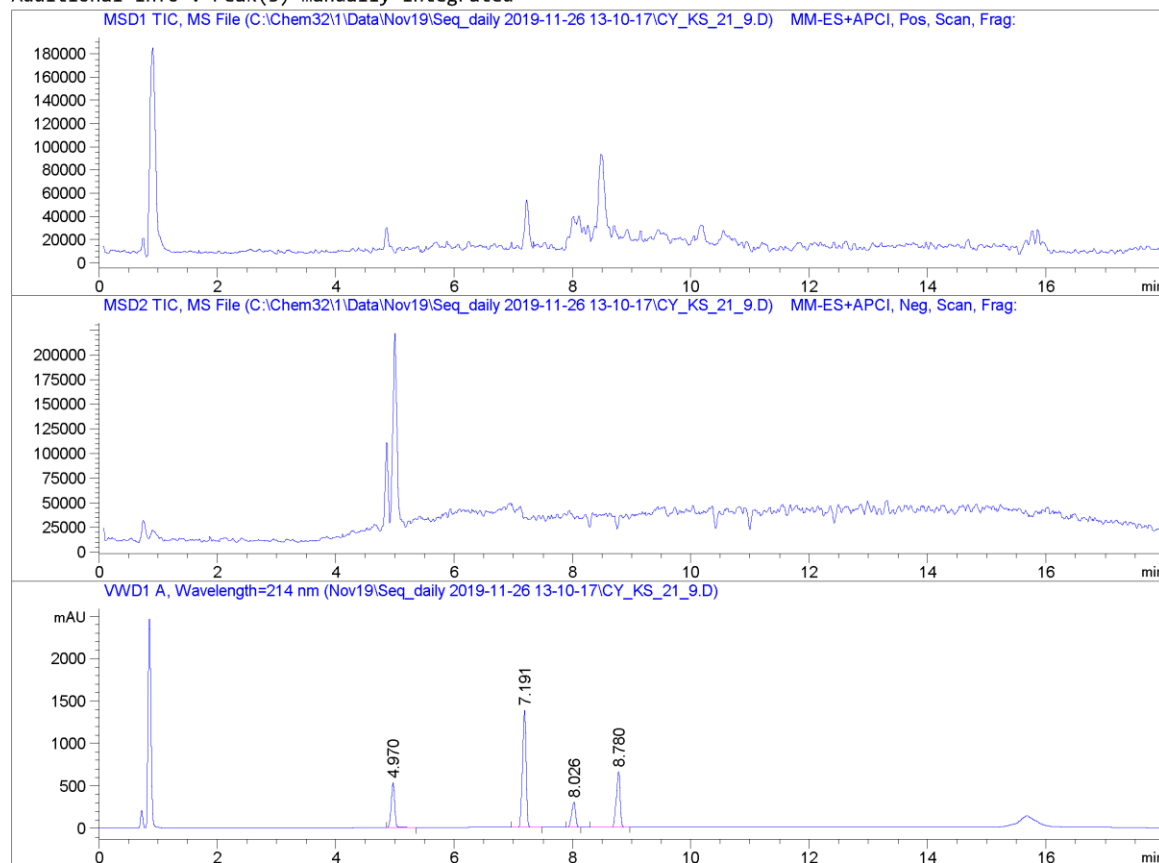

```
=====
                          Area Percent Report
=====
```

```
Sorted By      :      Signal
Multiplier     :      1.0000
Dilution       :      1.0000
Use Multiplier & Dilution Factor with ISTDs
```

Data File C:\Chem32\1\Data\Nov19\Seq\_daily 2019-11-26 13-10-17\CY\_KS\_21\_9.D  
Sample Name: CY\_KS\_21\_9

Signal 1: MSD1 TIC, MS File

Signal 2: MSD2 TIC, MS File

Signal 3: VWD1 A, Wavelength=214 nm

| Peak # | RetTime [min] | Type | Width [min] | Area [mAU*s] | Height [mAU] | Area %  |
|--------|---------------|------|-------------|--------------|--------------|---------|
| 1      | 4.970         | VV   | 0.0633      | 2214.12158   | 530.49738    | 17.9647 |
| 2      | 7.191         | VB   | 0.0627      | 5872.97852   | 1382.46716   | 47.6515 |
| 3      | 8.026         | BV   | 0.0654      | 1320.62268   | 294.62619    | 10.7151 |
| 4      | 8.780         | BV   | 0.0634      | 2917.13647   | 657.61914    | 23.6687 |

Totals : 1.23249e4 2865.20987

=====  
\*\*\* End of Report \*\*\*

```
=====
Acq. Operator   : SYSTEM                      Seq. Line :   24
Acq. Instrument : 6130B LCMS                 Location  :   69
Injection Date  : 26-Nov-19 8:44:52 PM      Inj       :    1
                                           Inj Volume: 10.000 µl
Method          : C:\Chem32\1\Data\Nov19\Seq_daily 2019-11-26 13-10-17\PORO_AMMACE_214_70.M (
                : Sequence Method)
Last changed    : 26-Nov-19 2:13:51 PM by SYSTEM
Method Info     : method for Poroshell 120 4.6 x75 x2.7µm
=====
```

Additional Info : Peak(s) manually integrated

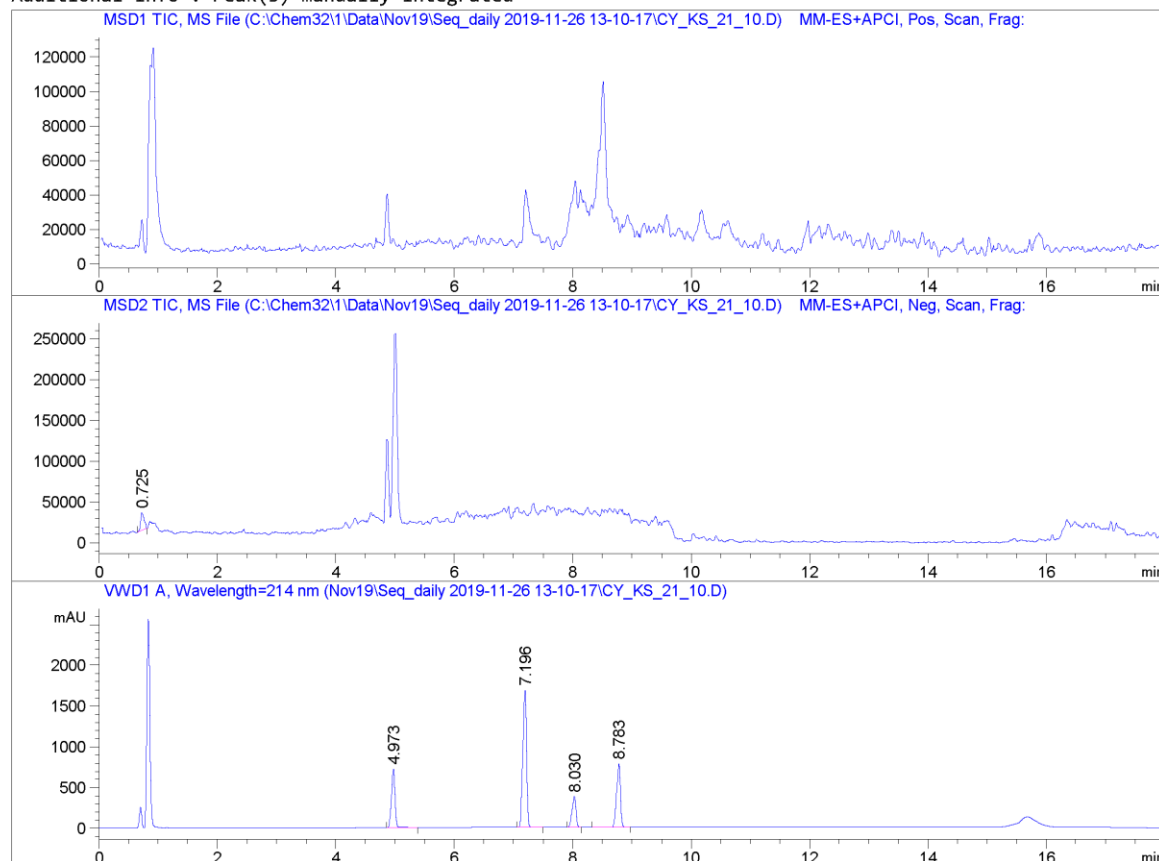

```
=====
                          Area Percent Report
=====
```

```
Sorted By      :      Signal
Multiplier     :      1.0000
Dilution       :      1.0000
Use Multiplier & Dilution Factor with ISTDs
```

Signal 1: MSD1 TIC, MS File

Signal 2: MSD2 TIC, MS File

| Peak # | RetTime [min] | Type | Width [min] | Area      | Height    | Area %   |
|--------|---------------|------|-------------|-----------|-----------|----------|
| 1      | 0.725         | BB   | 0.0630      | 8.93777e4 | 2.21501e4 | 100.0000 |

Totals :                    8.93777e4 2.21501e4

Signal 3: VWD1 A, Wavelength=214 nm

| Peak # | RetTime [min] | Type | Width [min] | Area [mAU*s] | Height [mAU] | Area %  |
|--------|---------------|------|-------------|--------------|--------------|---------|
| 1      | 4.973         | VV   | 0.0640      | 3066.78076   | 723.77808    | 19.5501 |
| 2      | 7.196         | BB   | 0.0640      | 7358.13770   | 1686.30530   | 46.9067 |
| 3      | 8.030         | BV   | 0.0680      | 1714.08752   | 373.96356    | 10.9270 |
| 4      | 8.783         | BV   | 0.0660      | 3547.74805   | 781.92694    | 22.6162 |

Totals :                    1.56868e4 3565.97388

=====  
\*\*\* End of Report \*\*\*



Data File C:\Chem32\1\Data\Nov19\Seq\_daily 2019-11-26 13-10-17\CY\_KS\_21\_11.D  
Sample Name: CY\_KS\_21\_11

```
=====
Acq. Operator   : SYSTEM                      Seq. Line : 25
Acq. Instrument : 6130B LCMS                  Location  : 70
Injection Date  : 26-Nov-19 9:04:32 PM       Inj       : 1
                                           Inj Volume: 10.000 µl
Method          : C:\Chem32\1\Data\Nov19\Seq_daily 2019-11-26 13-10-17\PORO_AMMACE_214_70.M (
                  Sequence Method)
Last changed    : 26-Nov-19 2:13:51 PM by SYSTEM
Method Info     : method for Poroshell 120 4.6 x75 x2.7µm
=====
```

Additional Info : Peak(s) manually integrated

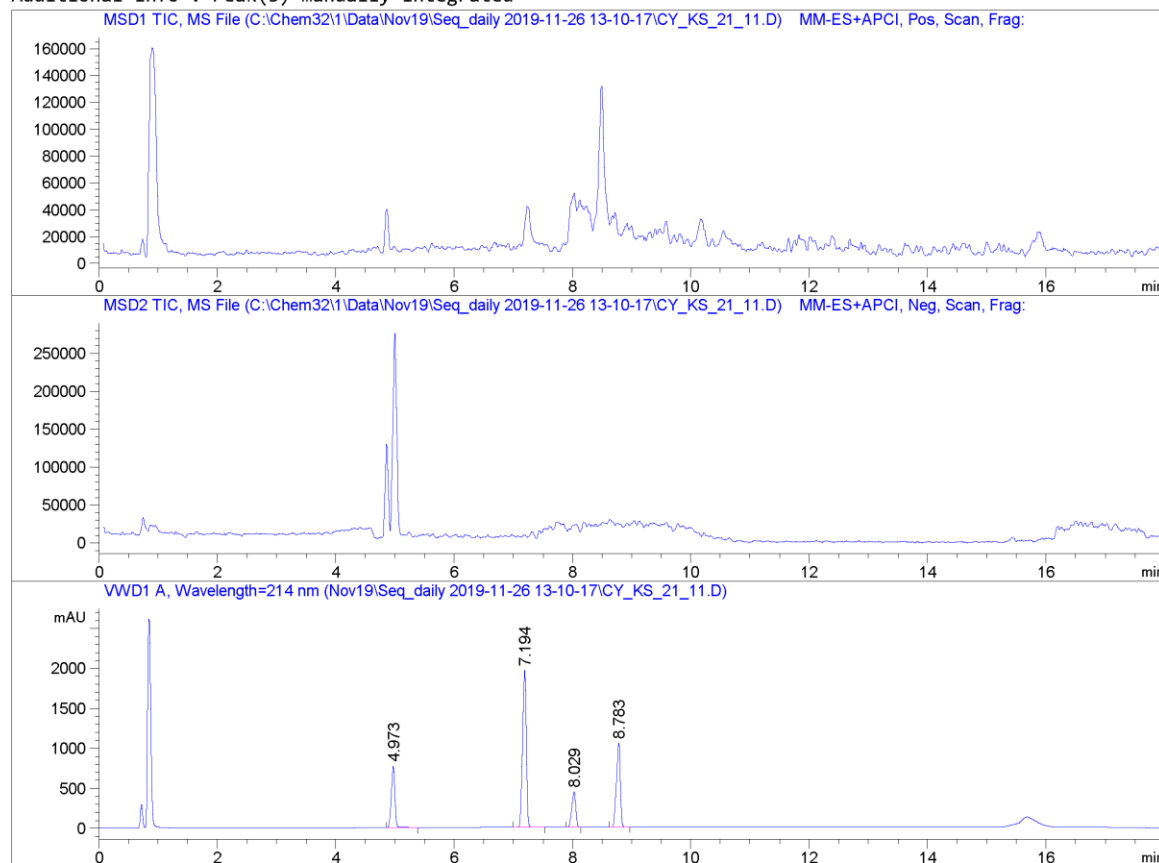

=====  
Area Percent Report  
=====

```
Sorted By      : Signal
Multiplier     : 1.0000
Dilution       : 1.0000
Use Multiplier & Dilution Factor with ISTDs
```

Data File C:\Chem32\1\Data\Nov19\Seq\_daily 2019-11-26 13-10-17\CY\_KS\_21\_11.D  
Sample Name: CY\_KS\_21\_11

Signal 1: MSD1 TIC, MS File

Signal 2: MSD2 TIC, MS File

Signal 3: VWD1 A, Wavelength=214 nm

| Peak # | RetTime [min] | Type | Width [min] | Area [mAU*s] | Height [mAU] | Area %  |
|--------|---------------|------|-------------|--------------|--------------|---------|
| 1      | 4.973         | VV   | 0.0645      | 3308.16919   | 772.48804    | 17.6441 |
| 2      | 7.194         | VB   | 0.0660      | 8666.34668   | 1964.11804   | 46.2220 |
| 3      | 8.029         | BV   | 0.0683      | 2036.13196   | 442.26819    | 10.8597 |
| 4      | 8.783         | BV   | 0.0658      | 4738.74072   | 1048.40881   | 25.2741 |

Totals : 1.87494e4 4227.28308

=====  
\*\*\* End of Report \*\*\*
